# Supplementary material for: Meta-Analysis of Neonicotinoid Insecticides in Global Surface Waters
Source: Research Square preprint supplement (doi:10.21203/rs.3.rs-1298825/v1), 2022-02-15
Supplement: Supplementary file 1 [file 3dd387781ba81e8dd432a059.xlsx]

## Sheet: Table S1(1)-All data
Reference	Type of NEO	Sites/River/Water samples	Country	longitude	Latitude	Date	Turbidity	pH	Temperature	DO（mg/L）	ORP（Eh）（mV）	COD（mg/L）	Stream discharge (m3/s)	Precipitation (mm)	Cultivated crops (%)	Mean Concentration	Units（单位）
Changing Patterns in Water Toxicity Associated with Current Use Pesticides in Three California Agriculture Regions	IMI	Alisal Slough	USA	-121.684	36.6863	2014-9										1330	ng/L
	IMI	Chualar Creek	USA	-121.523	36.5616	2014-9										1740	ng/L
	IMI	Main St.Ditch	USA			2014-9										1390	ng/L
	IMI	Orcutt Creek	USA	-120.524	34.9025	2014-9										1540	ng/L
	IMI	Oso Flaco Creek	USA	-120.59	35.0191	2014-9										580	ng/L
	IMI	Quail Creek	USA	-113.382	37.1778	2014-9										920	ng/L
	IMI	Rec Ditch Ⅲ	USA			2014-9										2010	ng/L
	IMI	Solomon Creek	USA	-85.7683	41.4698	2014-9										9140	ng/L
	IMI	Tembladero Slough	USA	-121.719	36.7197	2014-9										170	ng/L
	IMI	Alamo River Garst	USA	-115.621	33.2122	2014-10										350	ng/L
	IMI	Alamo River Ruth.	USA			2014-10										410	ng/L
	IMI	Holtville Main	USA	-115.501	32.863	2014-10										180	ng/L
	IMI	Malva Drain	USA	-115.479	33.0505	2014-10										ND	ng/L
	IMI	New River	USA	-115.668	33.1059	2014-10										70	ng/L
	IMI	Rice Drain Ⅲ	USA	-115.715	32.8265	2014-10										210	ng/L
	IMI	Vail Drain	USA	-115.637	33.1011	2014-10										900	ng/L
	IMI	Verde Drain	USA	-115.338	32.7415	2014-10										100	ng/L
	IMI	Alamo River Garst	USA	-115.63	33.2123	2015-9										460	ng/L
	IMI	Alamo River Ruth.	USA			2015-9										618	ng/L
	IMI	Holtville Main	USA	-115.501	32.863	2015-9										914	ng/L
	IMI	Malva Drain	USA	-115.479	33.0505	2015-9										ND	ng/L
	IMI	New River	USA	-115.668	33.1059	2015-9										234	ng/L
	IMI	Rice Drain Ⅲ	USA	-115.715	32.8265	2015-9										3480	ng/L
	IMI	Vail Drain	USA	-115.637	33.1011	2015-9										178	ng/L
	IMI	Verde Drain	USA	-115.338	32.7415	2015-9										103	ng/L
Consequences of IMI treatments for hemlock woolly adelgid on stream water quality in the southern Appalachians	IMI	Alum Creek	USA	-83.0341	40.2546	2012-6								24.4		28.5	ng/L
	IMI	Camel Hump Creek	USA	-83.2072	35.7448	2012-5										<20（MDL）	ng/L
	IMI	Cane Creek	USA	-82.1558	36.026	2013-2								5.3		<20（MDL）	ng/L
	IMI	Chasteen Creek	USA	-83.3163	35.5922	2012-12										36.8	ng/L
	IMI	Dunn Creek	USA	-83.3955	35.7725	2012-6								9.7		379.1	ng/L
	IMI	Indian Camp Creek	USA	-83.3354	35.7604	2012-6								9.7		78	ng/L
	IMI	Indian Creek	USA	-83.233	35.5499	2012-8								33.5		31.2	ng/L
	IMI	Kingfisher Creek	USA			2012-10										33.6	ng/L
	IMI	Panther Creek	USA	-95.5079	30.1633	2012-8								2		<20（MDL）	ng/L
	IMI	Shop Creek	USA	-93.2659	36.0527	2012-10								7.1		82.2	ng/L
Detection and analysis of neonicotinoids in river waters-Development of a passive sampler for three commonly used insecticides	ACE	Eastern creek	AUS	150.815	-33.8016	2013-1-29		6.89								190	ng/L
	ACE	Bell creek	AUS			2013-1-29	148	6.87								ND	ng/L
	ACE	South creek	AUS	150.628	-33.8545	2013-1-29	290	6.83								100	ng/L
	ACE	Yarramundi lagoon(inlet)	AUS	150.698	-33.6124	2013-1-29	93	6.9								ND	ng/L
	ACE	Nepean	AUS	150.115	-33.9743	2013-1-29	245	6.95								20	ng/L
	ACE	Nepean	AUS	150.115	-33.9743	2013-2-7	26	7.17								120	ng/L
	ACE	Nepean	AUS	150.115	-33.9743	2013-1-29	328	6.96								30	ng/L
	ACE	Cosgrove creek	AUS	149.126	-35.9715	2013-1-29	58	6.88								30	ng/L
	ACE	South creek	AUS	150.628	-33.8545	2013-1-29	343	6.92								20	ng/L
	ACE	South creek	AUS	150.628	-33.8545	2013-2-7	153	7.04								110	ng/L
	ACE	Kemps creek	AUS	150.719	-33.8692	2013-2-7	50	7.08								ND	ng/L
	ACE	Badgery's creek	AUS	150.709	-33.8817	2013-2-7	109	7.03								380	ng/L
	ACE	Yarramundi lagoon (outlet)	AUS	150.698	-33.6124	2013-2-7	39	7.1								ND	ng/L
	ACE	Wianamatta creek	AUS			2013-2-7	78	7.08								50	ng/L
	ACE	Eastern creek	AUS	150.815	-33.8016	2013-2-7	47	7.26								370	ng/L
	CLO	Eastern creek	AUS	150.815	-33.8016	2013-1-29		6.89								110	ng/L
	CLO	Bell creek	AUS			2013-1-29	148	6.87								90	ng/L
	CLO	South creek	AUS	150.628	-33.8545	2013-1-29	290	6.83								40	ng/L
	CLO	Yarramundi lagoon(inlet)	AUS	150.698	-33.6124	2013-1-29	93	6.9								ND	ng/L
	CLO	Nepean	AUS	150.115	-33.9743	2013-1-29	245	6.95								ND	ng/L
	CLO	Nepean	AUS	150.115	-33.9743	2013-2-7	26	7.17								20	ng/L
	CLO	Nepean	AUS	150.115	-33.9743	2013-1-29	328	6.96								ND	ng/L
	CLO	Cosgrove creek	AUS	149.126	-35.9715	2013-1-29	58	6.88								20	ng/L
	CLO	South creek	AUS	150.628	-33.8545	2013-1-29	343	6.92								120	ng/L
	CLO	South creek	AUS	150.628	-33.8545	2013-2-7	153	7.04								ND	ng/L
	CLO	Kemps creek	AUS	150.719	-33.8692	2013-2-7	50	7.08								ND	ng/L
	CLO	Badgery's creek	AUS	150.709	-33.8817	2013-2-7	109	7.03								ND	ng/L
	CLO	Yarramundi lagoon (outlet)	AUS	150.698	-33.6124	2013-2-7	39	7.1								ND	ng/L
	CLO	Wianamatta creek	AUS			2013-2-7	78	7.08								60	ng/L
	CLO	Eastern creek	AUS	150.815	-33.8016	2013-2-7	47	7.26								420	ng/L
	IMI	Eastern creek	AUS	150.815	-33.8016	2013-1-29		6.89								320	ng/L
	IMI	Bell creek	AUS			2013-1-29	148	6.87								50	ng/L
	IMI	South creek	AUS	150.628	-33.8545	2013-1-29	290	6.83								200	ng/L
	IMI	Yarramundi lagoon(inlet)	AUS	150.698	-33.6124	2013-1-29	93	6.9								240	ng/L
	IMI	Nepean	AUS	150.115	-33.9743	2013-1-29	245	6.95								170	ng/L
	IMI	Nepean	AUS	150.115	-33.9743	2013-2-7	26	7.17								ND	ng/L
	IMI	Nepean	AUS	150.115	-33.9743	2013-1-29	328	6.96								40	ng/L
	IMI	Cosgrove creek	AUS	149.126	-35.9715	2013-1-29	58	6.88								120	ng/L
	IMI	South creek	AUS	150.628	-33.8545	2013-1-29	343	6.92								170	ng/L
	IMI	South creek	AUS	150.628	-33.8545	2013-2-7	153	7.04								70	ng/L
	IMI	Kemps creek	AUS	150.719	-33.8692	2013-2-7	50	7.08								210	ng/L
	IMI	Badgery's creek	AUS	150.709	-33.8817	2013-2-7	109	7.03								740	ng/L
	IMI	Yarramundi lagoon (outlet)	AUS	150.698	-33.6124	2013-2-7	39	7.1								4560	ng/L
	IMI	Wianamatta creek	AUS			2013-2-7	78	7.08								70	ng/L
	IMI	Eastern creek	AUS	150.815	-33.8016	2013-2-7	47	7.26								420	ng/L
	THI	Eastern creek	AUS	150.815	-33.8016	2013-1-29		6.89								400	ng/L
	THI	Bell creek	AUS			2013-1-29	148	6.87								120	ng/L
	THI	South creek	AUS	150.628	-33.8545	2013-1-29	290	6.83								350	ng/L
	THI	Yarramundi lagoon(inlet)	AUS	150.698	-33.6124	2013-1-29	93	6.9								150	ng/L
	THI	Nepean	AUS	150.115	-33.9743	2013-1-29	245	6.95								130	ng/L
	THI	Nepean	AUS	150.115	-33.9743	2013-2-7	26	7.17								20	ng/L
	THI	Nepean	AUS	150.115	-33.9743	2013-1-29	328	6.96								60	ng/L
	THI	Cosgrove creek	AUS	149.126	-35.9715	2013-1-29	58	6.88								70	ng/L
	THI	South creek	AUS	150.628	-33.8545	2013-1-29	343	6.92								70	ng/L
	THI	South creek	AUS	150.628	-33.8545	2013-2-7	153	7.04								ND	ng/L
	THI	Kemps creek	AUS	150.719	-33.8692	2013-2-7	50	7.08								ND	ng/L
	THI	Badgery's creek	AUS	150.709	-33.8817	2013-2-7	109	7.03								180	ng/L
	THI	Yarramundi lagoon (outlet)	AUS	150.698	-33.6124	2013-2-7	39	7.1								1370	ng/L
	THI	Wianamatta creek	AUS			2013-2-7	78	7.08								ND	ng/L
	THI	Eastern creek	AUS	150.815	-33.8016	2013-2-7	47	7.26								160	ng/L
	TXM	Eastern creek	AUS	150.815	-33.8016	2013-1-29		6.89								170	ng/L
	TXM	Bell creek	AUS			2013-1-29	148	6.87								80	ng/L
	TXM	South creek	AUS	150.628	-33.8545	2013-1-29	290	6.83								ND	ng/L
	TXM	Yarramundi lagoon(inlet)	AUS	150.698	-33.6124	2013-1-29	93	6.9								ND	ng/L
	TXM	Nepean	AUS	150.115	-33.9743	2013-1-29	245	6.95								ND	ng/L
	TXM	Nepean	AUS	150.115	-33.9743	2013-2-7	26	7.17								ND	ng/L
	TXM	Nepean	AUS	150.115	-33.9743	2013-1-29	328	6.96								ND	ng/L
	TXM	Cosgrove creek	AUS	149.126	-35.9715	2013-1-29	58	6.88								ND	ng/L
	TXM	South creek	AUS	150.628	-33.8545	2013-1-29	343	6.92								40	ng/L
	TXM	South creek	AUS	150.628	-33.8545	2013-2-7	153	7.04								ND	ng/L
	TXM	Kemps creek	AUS	150.719	-33.8692	2013-2-7	50	7.08								ND	ng/L
	TXM	Badgery's creek	AUS	150.709	-33.8817	2013-2-7	109	7.03								ND	ng/L
	TXM	Yarramundi lagoon (outlet)	AUS	150.698	-33.6124	2013-2-7	39	7.1								ND	ng/L
	TXM	Wianamatta creek	AUS			2013-2-7	78	7.08								ND	ng/L
	TXM	Eastern creek	AUS	150.815	-33.8016	2013-2-7	47	7.26								200	ng/L
Detections of the Neonicotinoid Insecticide IMI in Surface Waters of Three Agricultural Regions of California, USA,2010-2011	IMI	Imperial 13-10	USA	-115.596	33.1992	2010-10-5										353	ng/L
	IMI	Imperial 13-22	USA	-115.405	32.9307	2010-10-5										133	ng/L
	IMI	Imperial 13-25	USA	-115.337	32.7555	2010-10-5										80	ng/L
	IMI	Imperial 13-56	USA	-115.487	33.0445	2010-10-5										276	ng/L
	IMI	Imperial 13-69	USA	-115.651	32.8689	2010-10-5										602	ng/L
	IMI	Imperial 13-71	USA	-115.606	32.9132	2011-10-11										559	ng/L
	IMI	Imperial 13-69	USA	-115.651	32.8689	2011-10-11										789	ng/L
	IMI	Imperial 13-25	USA	-115.337	32.7555	2011-10-11										114	ng/L
	IMI	Imperial 13-73	USA	-115.415	32.8617	2011-10-11										ND	ng/L
	IMI	Imperial 13-22	USA	-115.405	32.9307	2011-10-11										262	ng/L
	IMI	Imperial 13-23	USA	-115.478	33.0518	2011-10-11										329	ng/L
	IMI	Imperial 13-56	USA	-115.487	33.0445	2011-10-11										269	ng/L
	IMI	Imperial 13-10	USA	-115.596	33.1992	2011-10-11										301	ng/L
	IMI	Imperial 13-24	USA	-115.665	33.1328	2011-10-11										241	ng/L
	IMI	Salinas 27-10	USA	-121.619	36.6612	2010-5-17										103	ng/L
	IMI	Salinas 27-14	USA	-121.781	36.7319	2010-5-17										ND	ng/L
	IMI	Salinas 27-66	USA	-121.754	36.7596	2010-5-17										223	ng/L
	IMI	Salinas 27-7	USA	-121.562	36.6092	2010-5-17										1020	ng/L
	IMI	Salinas 27-70	USA	-121.577	36.6436	2010-5-17										489	ng/L
	IMI	Salinas 27-8	USA	-121.529	36.5586	2010-5-17										443	ng/L
	IMI	Salinas 27-10	USA	-121.619	36.6612	2010-6-7										1240	ng/L
	IMI	Salinas 27-66	USA	-121.754	36.7596	2010-6-7										647	ng/L
	IMI	Salinas 27-7	USA	-121.562	36.6092	2010-6-7										554	ng/L
	IMI	Salinas 27-70	USA	-121.577	36.6436	2010-6-7										924	ng/L
	IMI	Salinas 27-8	USA	-121.529	36.5586	2010-6-7										626	ng/L
	IMI	Salinas 27-10	USA	-121.619	36.6612	2011-4-25										3050	ng/L
	IMI	Salinas 27-14	USA	-121.781	36.7319	2011-4-25										ND	ng/L
	IMI	Salinas 27-66	USA	-121.754	36.7596	2011-4-25										418	ng/L
	IMI	Salinas 27-7	USA	-121.562	36.6092	2011-4-25										581	ng/L
	IMI	Salinas 27-70	USA	-121.577	36.6436	2011-4-25										2090	ng/L
	IMI	Salinas 27-8	USA	-121.529	36.5586	2011-4-25										372	ng/L
	IMI	Salinas 27-11	USA	-121.79	36.7908	2011-4-26										272	ng/L
	IMI	Salinas 27-13	USA	-121.701	36.6471	2011-4-26										ND	ng/L
	IMI	Salinas 27-9	USA	-121.734	36.6988	2011-4-26										ND	ng/L
	IMI	Salinas 27-10	USA	-121.619	36.6612	2011-5-16										2060	ng/L
	IMI	Salinas 27-14	USA	-121.781	36.7319	2011-5-16										50	ng/L
	IMI	Salinas 27-66	USA	-121.754	36.7596	2011-5-16										448	ng/L
	IMI	Salinas 27-70	USA	-121.577	36.6436	2011-5-16										1790	ng/L
	IMI	Salinas 27-8	USA	-121.529	36.5586	2011-5-16										787	ng/L
	IMI	Salinas 27-10	USA	-121.619	36.6612	2011-6-13										570	ng/L
	IMI	Salinas 27-14	USA	-121.781	36.7319	2011-6-13										ND	ng/L
	IMI	Salinas 27-66	USA	-121.754	36.7596	2011-6-13										334	ng/L
	IMI	Salinas 27-7	USA	-121.562	36.6092	2011-6-13										2090	ng/L
	IMI	Salinas 27-70	USA	-121.577	36.6436	2011-6-13										480	ng/L
	IMI	Salinas 27-8	USA	-121.529	36.5586	2011-6-13										440	ng/L
	IMI	Salinas 27-11	USA	-121.79	36.7908	2011-6-14										20	ng/L
	IMI	Salinas 27-50	USA	-121.789	36.7716	2011-6-14										167	ng/L
	IMI	Salinas 27-66	USA	-121.754	36.7596	2011-6-14										203	ng/L
	IMI	Salinas 27-66	USA	-121.754	36.7596	2011-7-18										178	ng/L
	IMI	Salinas 27-11	USA	-121.79	36.7908	2011-7-19										114	ng/L
	IMI	Salinas 27-14	USA	-121.781	36.7319	2011-7-19										ND	ng/L
	IMI	Salinas 27-7	USA	-121.562	36.6092	2011-7-19										157	ng/L
	IMI	Salinas 27-70	USA	-121.577	36.6436	2011-7-19										1030	ng/L
	IMI	Salinas 27-8	USA	-121.529	36.5586	2011-7-19										635	ng/L
	IMI	Salinas 27-10	USA	-121.619	36.6612	2011-8-30										1300	ng/L
	IMI	Salinas 27-11	USA	-121.79	36.7908	2011-8-30										130	ng/L
	IMI	Salinas 27-14	USA	-121.781	36.7319	2011-8-30										ND	ng/L
	IMI	Salinas 27-66	USA	-121.754	36.7596	2011-8-30										162	ng/L
	IMI	Salinas 27-70	USA	-121.577	36.6436	2011-8-30										450	ng/L
	IMI	Salinas 27-8	USA	-121.529	36.5586	2011-8-30										350	ng/L
	IMI	Santa Maria 40-13	USA	-120.587	35.0164	2010-6-8										544	ng/L
	IMI	Santa Maria 42-48	USA	-120.573	34.9415	2010-6-8										723	ng/L
	IMI	Santa Maria 42-49	USA	-120.484	34.9549	2010-6-8										168	ng/L
	IMI	Santa Maria 42-50	USA	-120.632	34.9576	2010-6-8										938	ng/L
	IMI	Santa Maria 42-50	USA	-120.632	34.9576	2010-6-8										876	ng/L
	IMI	Santa Maria 42-50	USA	-120.632	34.9576	2011-5-17										1110	ng/L
	IMI	Santa Maria 42-50	USA	-120.632	34.9576	2011-5-17										1180	ng/L
	IMI	Santa Maria 42-50	USA	-120.632	34.9576	2011-5-17										1380	ng/L
	IMI	Santa Maria 42-50	USA	-120.632	34.9576	2011-5-17										1260	ng/L
	IMI	Santa Maria 42-50	USA	-120.632	34.9576	2011-5-17										1210	ng/L
	IMI	Santa Maria 40-13	USA	-120.587	35.0164	2011-8-31										578	ng/L
	IMI	Santa Maria 42-48	USA	-120.573	34.9415	2011-8-31										1240	ng/L
	IMI	Santa Maria 42-50	USA	-120.632	34.9576	2011-8-31										984	ng/L
	IMI	Santa Maria 42-50	USA	-120.632	34.9576	2011-8-31										842	ng/L
	IMI	Santa Maria 42-50	USA	-120.632	34.9576	2011-8-31										878	ng/L
Ecological and landscape drivers of neonicotinoid insecticide detections and concentrations in Canada's Prairie wetlands	CLO		CAN	-105.814	54.9626	2012-7~8										142	ng/L
	TXM		CAN	-105.814	54.9626											40.3	ng/L
	IMI		CAN	-105.814	54.9626											15.9	ng/L
	ACE		CAN	-105.814	54.9626											1.1	ng/L
	CLO		CAN	-105.814	54.9626	2013-7~8										59.7	ng/L
	TXM		CAN	-105.814	54.9626											40.6	ng/L
	IMI		CAN	-105.814	54.9626											7.1	ng/L
	ACE		CAN	-105.814	54.9626											0.6	ng/L
Ecological risk assessment of the increasing use of the neonicotinoid insecticides along the east coast of China	ACE	Yalu River	CHN	124.39	40.12	Dry season 10~4										ND	ng/L
	ACE	Liao River	CHN	122.07	41.18	Dry season 10~4										33.57	ng/L
	ACE	Luan River	CHN	118.76	39.74	Dry season 10~4										2.78	ng/L
	ACE	Yellow River	CHN	118.07	37.35	Dry season 10~4										25.49	ng/L
	ACE	Yangtze River.	CHN	120.73	32.05	Dry season 10~4										5.67	ng/L
	ACE	Huangpu River	CHN	121.51	31.21	Dry season 10~4										48.76	ng/L
	ACE	Qiantang River	CHN	120.27	30.29	Dry season 10~4										3.14	ng/L
	ACE	Oujiang River	CHN	120.77	28	Dry season 10~4										3.95	ng/L
	ACE	Minjiang River	CHN	119.46	25.98	Dry season 10~4										0.27	ng/L
	ACE	Jinjiang River	CHN	118.56	24.94	Dry season 10~4										9.43	ng/L
	ACE	Jiulong River	CHN	117.76	24.48	Dry season 10~4										30.39	ng/L
	ACE	Hanjiang River	CHN	116.65	23.65	Dry season 10~4										2.16	ng/L
	ACE	East River	CHN	113.87	23.11	Dry season 10~4										7.73	ng/L
	ACE	North River	CHN	112.83	23.16	Dry season 10~4										0.77	ng/L
	ACE	West River	CHN	112.47	23.03	Dry season 10~4										ND	ng/L
	ACE	Nandu River	CHN	110.38	20.02	Dry season 10~4										118.49	ng/L
	CLO	Yalu River	CHN	124.39	40.12	Dry season 10~4										ND	ng/L
	CLO	Liao River	CHN	122.07	41.18	Dry season 10~4										1.2	ng/L
	CLO	Luan River	CHN	118.76	39.74	Dry season 10~4										71.05	ng/L
	CLO	Yellow River	CHN	118.07	37.35	Dry season 10~4										ND	ng/L
	CLO	Yangtze River.	CHN	120.73	32.05	Dry season 10~4										1.55	ng/L
	CLO	Huangpu River	CHN	121.51	31.21	Dry season 10~4										ND	ng/L
	CLO	Qiantang River	CHN	120.27	30.29	Dry season 10~4										5.04	ng/L
	CLO	Oujiang River	CHN	120.77	28	Dry season 10~4										3.63	ng/L
	CLO	Minjiang River	CHN	119.46	25.98	Dry season 10~4										ND	ng/L
	CLO	Jinjiang River	CHN	118.56	24.94	Dry season 10~4										5.9	ng/L
	CLO	Jiulong River	CHN	117.76	24.48	Dry season 10~4										5.98	ng/L
	CLO	Hanjiang River	CHN	116.65	23.65	Dry season 10~4										2.6	ng/L
	CLO	East River	CHN	113.87	23.11	Dry season 10~4										13.58	ng/L
	CLO	North River	CHN	112.83	23.16	Dry season 10~4										93.86	ng/L
	CLO	West River	CHN	112.47	23.03	Dry season 10~4										35.98	ng/L
	CLO	Nandu River	CHN	110.38	20.02	Dry season 10~4										2.76	ng/L
	DIN	Yalu River	CHN	124.39	40.12	Dry season 10~4										2.54	ng/L
	DIN	Liao River	CHN	122.07	41.18	Dry season 10~4										392.56	ng/L
	DIN	Luan River	CHN	118.76	39.74	Dry season 10~4										10.99	ng/L
	DIN	Yellow River	CHN	118.07	37.35	Dry season 10~4										16.42	ng/L
	DIN	Yangtze River.	CHN	120.73	32.05	Dry season 10~4										1022.2	ng/L
	DIN	Huangpu River	CHN	121.51	31.21	Dry season 10~4										26.26	ng/L
	DIN	Qiantang River	CHN	120.27	30.29	Dry season 10~4										27.44	ng/L
	DIN	Oujiang River	CHN	120.77	28	Dry season 10~4										1.14	ng/L
	DIN	Minjiang River	CHN	119.46	25.98	Dry season 10~4										4	ng/L
	DIN	Jinjiang River	CHN	118.56	24.94	Dry season 10~4										10.44	ng/L
	DIN	Jiulong River	CHN	117.76	24.48	Dry season 10~4										ND	ng/L
	DIN	Hanjiang River	CHN	116.65	23.65	Dry season 10~4										4.66	ng/L
	DIN	East River	CHN	113.87	23.11	Dry season 10~4										24.08	ng/L
	DIN	North River	CHN	112.83	23.16	Dry season 10~4										166.93	ng/L
	DIN	West River	CHN	112.47	23.03	Dry season 10~4										39.75	ng/L
	DIN	Nandu River	CHN	110.38	20.02	Dry season 10~4										73.77	ng/L
	IMI	Yalu River	CHN	124.39	40.12	Dry season 10~4										1.25	ng/L
	IMI	Liao River	CHN	122.07	41.18	Dry season 10~4										1.33	ng/L
	IMI	Luan River	CHN	118.76	39.74	Dry season 10~4										1.53	ng/L
	IMI	Yellow River	CHN	118.07	37.35	Dry season 10~4										8.04	ng/L
	IMI	Yangtze River.	CHN	120.73	32.05	Dry season 10~4										30.9	ng/L
	IMI	Huangpu River	CHN	121.51	31.21	Dry season 10~4										73.28	ng/L
	IMI	Qiantang River	CHN	120.27	30.29	Dry season 10~4										7.41	ng/L
	IMI	Oujiang River	CHN	120.77	28	Dry season 10~4										14.72	ng/L
	IMI	Minjiang River	CHN	119.46	25.98	Dry season 10~4										3.11	ng/L
	IMI	Jinjiang River	CHN	118.56	24.94	Dry season 10~4										31.52	ng/L
	IMI	Jiulong River	CHN	117.76	24.48	Dry season 10~4										33.16	ng/L
	IMI	Hanjiang River	CHN	116.65	23.65	Dry season 10~4										7.39	ng/L
	IMI	East River	CHN	113.87	23.11	Dry season 10~4										10.04	ng/L
	IMI	North River	CHN	112.83	23.16	Dry season 10~4										31.72	ng/L
	IMI	West River	CHN	112.47	23.03	Dry season 10~4										22.64	ng/L
	IMI	Nandu River	CHN	110.38	20.02	Dry season 10~4										354.86	ng/L
	IMZ	Yalu River	CHN	124.39	40.12	Dry season 10~4										15.35	ng/L
	IMZ	Liao River	CHN	122.07	41.18	Dry season 10~4										34.27	ng/L
	IMZ	Luan River	CHN	118.76	39.74	Dry season 10~4										27.54	ng/L
	IMZ	Yellow River	CHN	118.07	37.35	Dry season 10~4										39.08	ng/L
	IMZ	Yangtze River.	CHN	120.73	32.05	Dry season 10~4										81.92	ng/L
	IMZ	Huangpu River	CHN	121.51	31.21	Dry season 10~4										47.35	ng/L
	IMZ	Qiantang River	CHN	120.27	30.29	Dry season 10~4										21.07	ng/L
	IMZ	Oujiang River	CHN	120.77	28	Dry season 10~4										15.89	ng/L
	IMZ	Minjiang River	CHN	119.46	25.98	Dry season 10~4										21.14	ng/L
	IMZ	Jinjiang River	CHN	118.56	24.94	Dry season 10~4										21.27	ng/L
	IMZ	Jiulong River	CHN	117.76	24.48	Dry season 10~4										16.75	ng/L
	IMZ	Hanjiang River	CHN	116.65	23.65	Dry season 10~4										15.78	ng/L
	IMZ	East River	CHN	113.87	23.11	Dry season 10~4										32.44	ng/L
	IMZ	North River	CHN	112.83	23.16	Dry season 10~4										68.23	ng/L
	IMZ	West River	CHN	112.47	23.03	Dry season 10~4										41.04	ng/L
	IMZ	Nandu River	CHN	110.38	20.02	Dry season 10~4										47.45	ng/L
	NIT	Yalu River	CHN	124.39	40.12	Dry season 10~4										152.54	ng/L
	NIT	Liao River	CHN	122.07	41.18	Dry season 10~4										7.52	ng/L
	NIT	Luan River	CHN	118.76	39.74	Dry season 10~4										5.05	ng/L
	NIT	Yellow River	CHN	118.07	37.35	Dry season 10~4										11.5	ng/L
	NIT	Yangtze River.	CHN	120.73	32.05	Dry season 10~4										672.9	ng/L
	NIT	Huangpu River	CHN	121.51	31.21	Dry season 10~4										42.32	ng/L
	NIT	Qiantang River	CHN	120.27	30.29	Dry season 10~4										30.21	ng/L
	NIT	Oujiang River	CHN	120.77	28	Dry season 10~4										ND	ng/L
	NIT	Minjiang River	CHN	119.46	25.98	Dry season 10~4										6.93	ng/L
	NIT	Jinjiang River	CHN	118.56	24.94	Dry season 10~4										11.21	ng/L
	NIT	Jiulong River	CHN	117.76	24.48	Dry season 10~4										6.52	ng/L
	NIT	Hanjiang River	CHN	116.65	23.65	Dry season 10~4										6.74	ng/L
	NIT	East River	CHN	113.87	23.11	Dry season 10~4										92.48	ng/L
	NIT	North River	CHN	112.83	23.16	Dry season 10~4										400.31	ng/L
	NIT	West River	CHN	112.47	23.03	Dry season 10~4										173.18	ng/L
	NIT	Nandu River	CHN	110.38	20.02	Dry season 10~4										55.44	ng/L
	THI	Yalu River	CHN	124.39	40.12	Dry season 10~4										ND	ng/L
	THI	Liao River	CHN	122.07	41.18	Dry season 10~4										0.42	ng/L
	THI	Luan River	CHN	118.76	39.74	Dry season 10~4										ND	ng/L
	THI	Yellow River	CHN	118.07	37.35	Dry season 10~4										0.19	ng/L
	THI	Yangtze River.	CHN	120.73	32.05	Dry season 10~4										3.07	ng/L
	THI	Huangpu River	CHN	121.51	31.21	Dry season 10~4										1.67	ng/L
	THI	Qiantang River	CHN	120.27	30.29	Dry season 10~4										0.1	ng/L
	THI	Oujiang River	CHN	120.77	28	Dry season 10~4										ND	ng/L
	THI	Minjiang River	CHN	119.46	25.98	Dry season 10~4										ND	ng/L
	THI	Jinjiang River	CHN	118.56	24.94	Dry season 10~4										0.11	ng/L
	THI	Jiulong River	CHN	117.76	24.48	Dry season 10~4										0.13	ng/L
	THI	Hanjiang River	CHN	116.65	23.65	Dry season 10~4										0.84	ng/L
	THI	East River	CHN	113.87	23.11	Dry season 10~4										1.77	ng/L
	THI	North River	CHN	112.83	23.16	Dry season 10~4										1.08	ng/L
	THI	West River	CHN	112.47	23.03	Dry season 10~4										0.62	ng/L
	THI	Nandu River	CHN	110.38	20.02	Dry season 10~4										3.84	ng/L
	TXM	Yalu River	CHN	124.39	40.12	Dry season 10~4										1.79	ng/L
	TXM	Liao River	CHN	122.07	41.18	Dry season 10~4										7.12	ng/L
	TXM	Luan River	CHN	118.76	39.74	Dry season 10~4										6.76	ng/L
	TXM	Yellow River	CHN	118.07	37.35	Dry season 10~4										1.67	ng/L
	TXM	Yangtze River.	CHN	120.73	32.05	Dry season 10~4										43.43	ng/L
	TXM	Huangpu River	CHN	121.51	31.21	Dry season 10~4										8.99	ng/L
	TXM	Qiantang River	CHN	120.27	30.29	Dry season 10~4										1.81	ng/L
	TXM	Oujiang River	CHN	120.77	28	Dry season 10~4										12.18	ng/L
	TXM	Minjiang River	CHN	119.46	25.98	Dry season 10~4										1.34	ng/L
	TXM	Jinjiang River	CHN	118.56	24.94	Dry season 10~4										9.33	ng/L
	TXM	Jiulong River	CHN	117.76	24.48	Dry season 10~4										6.98	ng/L
	TXM	Hanjiang River	CHN	116.65	23.65	Dry season 10~4										2.78	ng/L
	TXM	East River	CHN	113.87	23.11	Dry season 10~4										13.7	ng/L
	TXM	North River	CHN	112.83	23.16	Dry season 10~4										27.31	ng/L
	TXM	West River	CHN	112.47	23.03	Dry season 10~4										13.83	ng/L
	TXM	Nandu River	CHN	110.38	20.02	Dry season 10~4										95.85	ng/L
	ACE	Yalu River	CHN	124.39	40.12	Wet season 5~9										ND	ng/L
	ACE	Liao River	CHN	122.07	41.18	Wet season 5~9										11.46	ng/L
	ACE	Luan River	CHN	118.76	39.74	Wet season 5~9										12.61	ng/L
	ACE	Yellow River	CHN	118.07	37.35	Wet season 5~9										26.36	ng/L
	ACE	Yangtze River.	CHN	120.73	32.05	Wet season 5~9										9.77	ng/L
	ACE	Huangpu River	CHN	121.51	31.21	Wet season 5~9										43.11	ng/L
	ACE	Qiantang River	CHN	120.27	30.29	Wet season 5~9										23.28	ng/L
	ACE	Oujiang River	CHN	120.77	28	Wet season 5~9										3.84	ng/L
	ACE	Minjiang River	CHN	119.46	25.98	Wet season 5~9										4.61	ng/L
	ACE	Jinjiang River	CHN	118.56	24.94	Wet season 5~9										4.56	ng/L
	ACE	Jiulong River	CHN	117.76	24.48	Wet season 5~9										73.42	ng/L
	ACE	Hanjiang River	CHN	116.65	23.65	Wet season 5~9										2.27	ng/L
	ACE	East River	CHN	113.87	23.11	Wet season 5~9										15.25	ng/L
	ACE	North River	CHN	112.83	23.16	Wet season 5~9										5.35	ng/L
	ACE	West River	CHN	112.47	23.03	Wet season 5~9										1.35	ng/L
	ACE	Nandu River	CHN	110.38	20.02	Wet season 5~9										4.13	ng/L
	CLO	Yalu River	CHN	124.39	40.12	Wet season 5~9										ND	ng/L
	CLO	Liao River	CHN	122.07	41.18	Wet season 5~9										5.12	ng/L
	CLO	Luan River	CHN	118.76	39.74	Wet season 5~9										2.44	ng/L
	CLO	Yellow River	CHN	118.07	37.35	Wet season 5~9										5.81	ng/L
	CLO	Yangtze River.	CHN	120.73	32.05	Wet season 5~9										14.43	ng/L
	CLO	Huangpu River	CHN	121.51	31.21	Wet season 5~9										16.08	ng/L
	CLO	Qiantang River	CHN	120.27	30.29	Wet season 5~9										2.64	ng/L
	CLO	Oujiang River	CHN	120.77	28	Wet season 5~9										6.1	ng/L
	CLO	Minjiang River	CHN	119.46	25.98	Wet season 5~9										ND	ng/L
	CLO	Jinjiang River	CHN	118.56	24.94	Wet season 5~9										ND	ng/L
	CLO	Jiulong River	CHN	117.76	24.48	Wet season 5~9										6.9	ng/L
	CLO	Hanjiang River	CHN	116.65	23.65	Wet season 5~9										1.31	ng/L
	CLO	East River	CHN	113.87	23.11	Wet season 5~9										2.46	ng/L
	CLO	North River	CHN	112.83	23.16	Wet season 5~9										2.93	ng/L
	CLO	West River	CHN	112.47	23.03	Wet season 5~9										ND	ng/L
	CLO	Nandu River	CHN	110.38	20.02	Wet season 5~9										9.61	ng/L
	DIN	Yalu River	CHN	124.39	40.12	Wet season 5~9										12.22	ng/L
	DIN	Liao River	CHN	122.07	41.18	Wet season 5~9										10.72	ng/L
	DIN	Luan River	CHN	118.76	39.74	Wet season 5~9										ND	ng/L
	DIN	Yellow River	CHN	118.07	37.35	Wet season 5~9										2.47	ng/L
	DIN	Yangtze River.	CHN	120.73	32.05	Wet season 5~9										274.24	ng/L
	DIN	Huangpu River	CHN	121.51	31.21	Wet season 5~9										7.48	ng/L
	DIN	Qiantang River	CHN	120.27	30.29	Wet season 5~9										11.4	ng/L
	DIN	Oujiang River	CHN	120.77	28	Wet season 5~9										ND	ng/L
	DIN	Minjiang River	CHN	119.46	25.98	Wet season 5~9										25.99	ng/L
	DIN	Jinjiang River	CHN	118.56	24.94	Wet season 5~9										2.54	ng/L
	DIN	Jiulong River	CHN	117.76	24.48	Wet season 5~9										7.02	ng/L
	DIN	Hanjiang River	CHN	116.65	23.65	Wet season 5~9										10.7	ng/L
	DIN	East River	CHN	113.87	23.11	Wet season 5~9										6.15	ng/L
	DIN	North River	CHN	112.83	23.16	Wet season 5~9										84.2	ng/L
	DIN	West River	CHN	112.47	23.03	Wet season 5~9										6.45	ng/L
	DIN	Nandu River	CHN	110.38	20.02	Wet season 5~9										44.35	ng/L
	IMI	Yalu River	CHN	124.39	40.12	Wet season 5~9										0.86	ng/L
	IMI	Liao River	CHN	122.07	41.18	Wet season 5~9										9.34	ng/L
	IMI	Luan River	CHN	118.76	39.74	Wet season 5~9										38.98	ng/L
	IMI	Yellow River	CHN	118.07	37.35	Wet season 5~9										65.11	ng/L
	IMI	Yangtze River.	CHN	120.73	32.05	Wet season 5~9										36.27	ng/L
	IMI	Huangpu River	CHN	121.51	31.21	Wet season 5~9										84.52	ng/L
	IMI	Qiantang River	CHN	120.27	30.29	Wet season 5~9										33.35	ng/L
	IMI	Oujiang River	CHN	120.77	28	Wet season 5~9										8.91	ng/L
	IMI	Minjiang River	CHN	119.46	25.98	Wet season 5~9										14.55	ng/L
	IMI	Jinjiang River	CHN	118.56	24.94	Wet season 5~9										15.91	ng/L
	IMI	Jiulong River	CHN	117.76	24.48	Wet season 5~9										72.86	ng/L
	IMI	Hanjiang River	CHN	116.65	23.65	Wet season 5~9										17.7	ng/L
	IMI	East River	CHN	113.87	23.11	Wet season 5~9										12.82	ng/L
	IMI	North River	CHN	112.83	23.16	Wet season 5~9										31.7	ng/L
	IMI	West River	CHN	112.47	23.03	Wet season 5~9										24.54	ng/L
	IMI	Nandu River	CHN	110.38	20.02	Wet season 5~9										77.69	ng/L
	IMZ	Yalu River	CHN	124.39	40.12	Wet season 5~9										22.86	ng/L
	IMZ	Liao River	CHN	122.07	41.18	Wet season 5~9										23.94	ng/L
	IMZ	Luan River	CHN	118.76	39.74	Wet season 5~9										32.65	ng/L
	IMZ	Yellow River	CHN	118.07	37.35	Wet season 5~9										24.68	ng/L
	IMZ	Yangtze River.	CHN	120.73	32.05	Wet season 5~9										32.57	ng/L
	IMZ	Huangpu River	CHN	121.51	31.21	Wet season 5~9										17.87	ng/L
	IMZ	Qiantang River	CHN	120.27	30.29	Wet season 5~9										16.11	ng/L
	IMZ	Oujiang River	CHN	120.77	28	Wet season 5~9										15.4	ng/L
	IMZ	Minjiang River	CHN	119.46	25.98	Wet season 5~9										21.57	ng/L
	IMZ	Jinjiang River	CHN	118.56	24.94	Wet season 5~9										16.58	ng/L
	IMZ	Jiulong River	CHN	117.76	24.48	Wet season 5~9										15.34	ng/L
	IMZ	Hanjiang River	CHN	116.65	23.65	Wet season 5~9										15.68	ng/L
	IMZ	East River	CHN	113.87	23.11	Wet season 5~9										17.3	ng/L
	IMZ	North River	CHN	112.83	23.16	Wet season 5~9										35.04	ng/L
	IMZ	West River	CHN	112.47	23.03	Wet season 5~9										15.23	ng/L
	IMZ	Nandu River	CHN	110.38	20.02	Wet season 5~9										38.61	ng/L
	NIT	Yalu River	CHN	124.39	40.12	Wet season 5~9										6.18	ng/L
	NIT	Liao River	CHN	122.07	41.18	Wet season 5~9										18.06	ng/L
	NIT	Luan River	CHN	118.76	39.74	Wet season 5~9										110.03	ng/L
	NIT	Yellow River	CHN	118.07	37.35	Wet season 5~9										2	ng/L
	NIT	Yangtze River.	CHN	120.73	32.05	Wet season 5~9										291.51	ng/L
	NIT	Huangpu River	CHN	121.51	31.21	Wet season 5~9										95.62	ng/L
	NIT	Qiantang River	CHN	120.27	30.29	Wet season 5~9										12.64	ng/L
	NIT	Oujiang River	CHN	120.77	28	Wet season 5~9										ND	ng/L
	NIT	Minjiang River	CHN	119.46	25.98	Wet season 5~9										136.31	ng/L
	NIT	Jinjiang River	CHN	118.56	24.94	Wet season 5~9										8.15	ng/L
	NIT	Jiulong River	CHN	117.76	24.48	Wet season 5~9										18.71	ng/L
	NIT	Hanjiang River	CHN	116.65	23.65	Wet season 5~9										13.03	ng/L
	NIT	East River	CHN	113.87	23.11	Wet season 5~9										ND	ng/L
	NIT	North River	CHN	112.83	23.16	Wet season 5~9										120.16	ng/L
	NIT	West River	CHN	112.47	23.03	Wet season 5~9										5.22	ng/L
	NIT	Nandu River	CHN	110.38	20.02	Wet season 5~9										41.75	ng/L
	THI	Yalu River	CHN	124.39	40.12	Wet season 5~9										0.08	ng/L
	THI	Liao River	CHN	122.07	41.18	Wet season 5~9										0.84	ng/L
	THI	Luan River	CHN	118.76	39.74	Wet season 5~9										ND	ng/L
	THI	Yellow River	CHN	118.07	37.35	Wet season 5~9										ND	ng/L
	THI	Yangtze River.	CHN	120.73	32.05	Wet season 5~9										1.37	ng/L
	THI	Huangpu River	CHN	121.51	31.21	Wet season 5~9										ND	ng/L
	THI	Qiantang River	CHN	120.27	30.29	Wet season 5~9										ND	ng/L
	THI	Oujiang River	CHN	120.77	28	Wet season 5~9										0.62	ng/L
	THI	Minjiang River	CHN	119.46	25.98	Wet season 5~9										0.49	ng/L
	THI	Jinjiang River	CHN	118.56	24.94	Wet season 5~9										0.34	ng/L
	THI	Jiulong River	CHN	117.76	24.48	Wet season 5~9										3.24	ng/L
	THI	Hanjiang River	CHN	116.65	23.65	Wet season 5~9										0.02	ng/L
	THI	East River	CHN	113.87	23.11	Wet season 5~9										0.67	ng/L
	THI	North River	CHN	112.83	23.16	Wet season 5~9										0.63	ng/L
	THI	West River	CHN	112.47	23.03	Wet season 5~9										0.43	ng/L
	THI	Nandu River	CHN	110.38	20.02	Wet season 5~9										1.31	ng/L
	TXM	Yalu River	CHN	124.39	40.12	Wet season 5~9										1.17	ng/L
	TXM	Liao River	CHN	122.07	41.18	Wet season 5~9										8.93	ng/L
	TXM	Luan River	CHN	118.76	39.74	Wet season 5~9										3.21	ng/L
	TXM	Yellow River	CHN	118.07	37.35	Wet season 5~9										1.58	ng/L
	TXM	Yangtze River.	CHN	120.73	32.05	Wet season 5~9										22.63	ng/L
	TXM	Huangpu River	CHN	121.51	31.21	Wet season 5~9										15.04	ng/L
	TXM	Qiantang River	CHN	120.27	30.29	Wet season 5~9										6.71	ng/L
	TXM	Oujiang River	CHN	120.77	28	Wet season 5~9										6.82	ng/L
	TXM	Minjiang River	CHN	119.46	25.98	Wet season 5~9										7.7	ng/L
	TXM	Jinjiang River	CHN	118.56	24.94	Wet season 5~9										2.65	ng/L
	TXM	Jiulong River	CHN	117.76	24.48	Wet season 5~9										16.2	ng/L
	TXM	Hanjiang River	CHN	116.65	23.65	Wet season 5~9										6.52	ng/L
	TXM	East River	CHN	113.87	23.11	Wet season 5~9										10.29	ng/L
	TXM	North River	CHN	112.83	23.16	Wet season 5~9										17.64	ng/L
	TXM	West River	CHN	112.47	23.03	Wet season 5~9										14.72	ng/L
	TXM	Nandu River	CHN	110.38	20.02	Wet season 5~9										28.89	ng/L
Evaluation of river pollution of neonicotinoids in Osaka City(Japan) by LC/MS with dopant-assisted photoionisationt	ACE	St.1	JPN	135.536	34.756	2009-8-18、24										ND	ng/L
	ACE	St.2	JPN	135.529	34.7342	2009-8-18、24										NA	ng/L
	ACE	St.3	JPN	135.446	34.7105	2009-8-18、24										ND	ng/L
	ACE	St.4	JPN	135.416	34.6893	2009-8-18、24										ND	ng/L
	ACE	St.5	JPN	135.419	34.6831	2009-8-18、24										ND	ng/L
	ACE	St.6	JPN	135.583	34.7003	2009-8-18、24										ND	ng/L
	ACE	St.7	JPN	135.579	34.6968	2009-8-18、24										ND	ng/L
	ACE	St.8	JPN	135.556	34.6879	2009-8-18、24										ND	ng/L
	ACE	St.9	JPN	135.554	34.6872	2009-8-18、24										ND	ng/L
	ACE	St.10	JPN	135.54	34.6892	2009-8-18、24										ND	ng/L
	ACE	St.11	JPN	135.541	34.6879	2009-8-18、24										ND	ng/L
	ACE	St.12	JPN	135.54	34.6618	2009-8-18、24										ND	ng/L
	ACE	St.13	JPN	135.522	34.7	2009-8-18、24										ND	ng/L
	ACE	St.14	JPN	135.521	34.6919	2009-8-18、24										ND	ng/L
	ACE	St.15	JPN	135.513	34.6917	2009-8-18、24										ND	ng/L
	ACE	St.16	JPN	135.51	34.6908	2009-8-18、24										ND	ng/L
	ACE	St.17	JPN	135.511	34.6823	2009-8-18、24										ND	ng/L
	ACE	St.18	JPN	135.497	34.669	2009-8-18、24										ND	ng/L
	ACE	St.19	JPN	135.458	34.6777	2009-8-18、24										ND	ng/L
	ACE	St.20	JPN	135.429	34.6578	2009-8-18、24										ND	ng/L
	ACE	St.21	JPN	135.462	34.6567	2009-8-18、24										ND	ng/L
	ACE	St.22	JPN	135.475	34.6313	2009-8-18、24										ND	ng/L
	ACE	St.23	JPN	135.458	34.6331	2009-8-18、24										ND	ng/L
	ACE	St.24	JPN	135.448	34.6276	2009-8-18、24										ND	ng/L
	ACE	St.25	JPN	135.459	34.6163	2009-8-18、24										ND	ng/L
	ACE	St.26	JPN	135.393	34.6414	2009-8-18、24										ND	ng/L
	CLO	St.1	JPN	135.536	34.756	2009-8-18、24										5.7	ng/L
	CLO	St.2	JPN	135.529	34.7342	2009-8-18、24										NA	ng/L
	CLO	St.3	JPN	135.446	34.7105	2009-8-18、24										3.3	ng/L
	CLO	St.4	JPN	135.416	34.6893	2009-8-18、24										3.3	ng/L
	CLO	St.5	JPN	135.419	34.6831	2009-8-18、24										12	ng/L
	CLO	St.6	JPN	135.583	34.7003	2009-8-18、24										2.4	ng/L
	CLO	St.7	JPN	135.579	34.6968	2009-8-18、24										2	ng/L
	CLO	St.8	JPN	135.556	34.6879	2009-8-18、24										NA	ng/L
	CLO	St.9	JPN	135.554	34.6872	2009-8-18、24										ND	ng/L
	CLO	St.10	JPN	135.54	34.6892	2009-8-18、24										ND	ng/L
	CLO	St.11	JPN	135.541	34.6879	2009-8-18、24										ND	ng/L
	CLO	St.12	JPN	135.54	34.6618	2009-8-18、24										ND	ng/L
	CLO	St.13	JPN	135.522	34.7	2009-8-18、24										5.6	ng/L
	CLO	St.14	JPN	135.521	34.6919	2009-8-18、24										6.1	ng/L
	CLO	St.15	JPN	135.513	34.6917	2009-8-18、24										5.5	ng/L
	CLO	St.16	JPN	135.51	34.6908	2009-8-18、24										5.1	ng/L
	CLO	St.17	JPN	135.511	34.6823	2009-8-18、24										2.8	ng/L
	CLO	St.18	JPN	135.497	34.669	2009-8-18、24										6.8	ng/L
	CLO	St.19	JPN	135.458	34.6777	2009-8-18、24										3.5	ng/L
	CLO	St.20	JPN	135.429	34.6578	2009-8-18、24										3.5	ng/L
	CLO	St.21	JPN	135.462	34.6567	2009-8-18、24										2.2	ng/L
	CLO	St.22	JPN	135.475	34.6313	2009-8-18、24										3.1	ng/L
	CLO	St.23	JPN	135.458	34.6331	2009-8-18、24										2.7	ng/L
	CLO	St.24	JPN	135.448	34.6276	2009-8-18、24										4.7	ng/L
	CLO	St.25	JPN	135.459	34.6163	2009-8-18、24										0.8	ng/L
	CLO	St.26	JPN	135.393	34.6414	2009-8-18、24										1.6	ng/L
	DIN	St.1	JPN	135.536	34.756	2009-8-18、24										35	ng/L
	DIN	St.2	JPN	135.529	34.7342	2009-8-18、24										NA	ng/L
	DIN	St.3	JPN	135.446	34.7105	2009-8-18、24										36	ng/L
	DIN	St.4	JPN	135.416	34.6893	2009-8-18、24										38	ng/L
	DIN	St.5	JPN	135.419	34.6831	2009-8-18、24										31	ng/L
	DIN	St.6	JPN	135.583	34.7003	2009-8-18、24										45	ng/L
	DIN	St.7	JPN	135.579	34.6968	2009-8-18、24										34	ng/L
	DIN	St.8	JPN	135.556	34.6879	2009-8-18、24										NA	ng/L
	DIN	St.9	JPN	135.554	34.6872	2009-8-18、24										63	ng/L
	DIN	St.10	JPN	135.54	34.6892	2009-8-18、24										63	ng/L
	DIN	St.11	JPN	135.541	34.6879	2009-8-18、24										54	ng/L
	DIN	St.12	JPN	135.54	34.6618	2009-8-18、24										100	ng/L
	DIN	St.13	JPN	135.522	34.7	2009-8-18、24										18	ng/L
	DIN	St.14	JPN	135.521	34.6919	2009-8-18、24										21	ng/L
	DIN	St.15	JPN	135.513	34.6917	2009-8-18、24										21	ng/L
	DIN	St.16	JPN	135.51	34.6908	2009-8-18、24										21	ng/L
	DIN	St.17	JPN	135.511	34.6823	2009-8-18、24										38	ng/L
	DIN	St.18	JPN	135.497	34.669	2009-8-18、24										53	ng/L
	DIN	St.19	JPN	135.458	34.6777	2009-8-18、24										20	ng/L
	DIN	St.20	JPN	135.429	34.6578	2009-8-18、24										21	ng/L
	DIN	St.21	JPN	135.462	34.6567	2009-8-18、24										30	ng/L
	DIN	St.22	JPN	135.475	34.6313	2009-8-18、24										28	ng/L
	DIN	St.23	JPN	135.458	34.6331	2009-8-18、24										19	ng/L
	DIN	St.24	JPN	135.448	34.6276	2009-8-18、24										27	ng/L
	DIN	St.25	JPN	135.459	34.6163	2009-8-18、24										16	ng/L
	DIN	St.26	JPN	135.393	34.6414	2009-8-18、24										9.4	ng/L
	IMI	St.1	JPN	135.536	34.756	2009-8-18、24										1.3	ng/L
	IMI	St.2	JPN	135.529	34.7342	2009-8-18、24										NA	ng/L
	IMI	St.3	JPN	135.446	34.7105	2009-8-18、24										2.3	ng/L
	IMI	St.4	JPN	135.416	34.6893	2009-8-18、24										2.7	ng/L
	IMI	St.5	JPN	135.419	34.6831	2009-8-18、24										1.3	ng/L
	IMI	St.6	JPN	135.583	34.7003	2009-8-18、24										3.5	ng/L
	IMI	St.7	JPN	135.579	34.6968	2009-8-18、24										1.8	ng/L
	IMI	St.8	JPN	135.556	34.6879	2009-8-18、24										NA	ng/L
	IMI	St.9	JPN	135.554	34.6872	2009-8-18、24										4.5	ng/L
	IMI	St.10	JPN	135.54	34.6892	2009-8-18、24										7	ng/L
	IMI	St.11	JPN	135.541	34.6879	2009-8-18、24										5.6	ng/L
	IMI	St.12	JPN	135.54	34.6618	2009-8-18、24										4.1	ng/L
	IMI	St.13	JPN	135.522	34.7	2009-8-18、24										ND	ng/L
	IMI	St.14	JPN	135.521	34.6919	2009-8-18、24										ND	ng/L
	IMI	St.15	JPN	135.513	34.6917	2009-8-18、24										ND	ng/L
	IMI	St.16	JPN	135.51	34.6908	2009-8-18、24										ND	ng/L
	IMI	St.17	JPN	135.511	34.6823	2009-8-18、24										3.5	ng/L
	IMI	St.18	JPN	135.497	34.669	2009-8-18、24										1.3	ng/L
	IMI	St.19	JPN	135.458	34.6777	2009-8-18、24										ND	ng/L
	IMI	St.20	JPN	135.429	34.6578	2009-8-18、24										ND	ng/L
	IMI	St.21	JPN	135.462	34.6567	2009-8-18、24										2.9	ng/L
	IMI	St.22	JPN	135.475	34.6313	2009-8-18、24										1.8	ng/L
	IMI	St.23	JPN	135.458	34.6331	2009-8-18、24										0.9	ng/L
	IMI	St.24	JPN	135.448	34.6276	2009-8-18、24										2.1	ng/L
	IMI	St.25	JPN	135.459	34.6163	2009-8-18、24										2.6	ng/L
	IMI	St.26	JPN	135.393	34.6414	2009-8-18、24										ND	ng/L
	NIT	St.1	JPN	135.536	34.756	2009-8-18、24										ND	ng/L
	NIT	St.2	JPN	135.529	34.7342	2009-8-18、24										NA	ng/L
	NIT	St.3	JPN	135.446	34.7105	2009-8-18、24										ND	ng/L
	NIT	St.4	JPN	135.416	34.6893	2009-8-18、24										ND	ng/L
	NIT	St.5	JPN	135.419	34.6831	2009-8-18、24										ND	ng/L
	NIT	St.6	JPN	135.583	34.7003	2009-8-18、24										ND	ng/L
	NIT	St.7	JPN	135.579	34.6968	2009-8-18、24										ND	ng/L
	NIT	St.8	JPN	135.556	34.6879	2009-8-18、24										NA	ng/L
	NIT	St.9	JPN	135.554	34.6872	2009-8-18、24										ND	ng/L
	NIT	St.10	JPN	135.54	34.6892	2009-8-18、24										ND	ng/L
	NIT	St.11	JPN	135.541	34.6879	2009-8-18、24										ND	ng/L
	NIT	St.12	JPN	135.54	34.6618	2009-8-18、24										ND	ng/L
	NIT	St.13	JPN	135.522	34.7	2009-8-18、24										ND	ng/L
	NIT	St.14	JPN	135.521	34.6919	2009-8-18、24										ND	ng/L
	NIT	St.15	JPN	135.513	34.6917	2009-8-18、24										ND	ng/L
	NIT	St.16	JPN	135.51	34.6908	2009-8-18、24										ND	ng/L
	NIT	St.17	JPN	135.511	34.6823	2009-8-18、24										ND	ng/L
	NIT	St.18	JPN	135.497	34.669	2009-8-18、24										ND	ng/L
	NIT	St.19	JPN	135.458	34.6777	2009-8-18、24										ND	ng/L
	NIT	St.20	JPN	135.429	34.6578	2009-8-18、24										ND	ng/L
	NIT	St.21	JPN	135.462	34.6567	2009-8-18、24										ND	ng/L
	NIT	St.22	JPN	135.475	34.6313	2009-8-18、24										ND	ng/L
	NIT	St.23	JPN	135.458	34.6331	2009-8-18、24										ND	ng/L
	NIT	St.24	JPN	135.448	34.6276	2009-8-18、24										ND	ng/L
	NIT	St.25	JPN	135.459	34.6163	2009-8-18、24										ND	ng/L
	NIT	St.26	JPN	135.393	34.6414	2009-8-18、24										ND	ng/L
	TXM	St.1	JPN	135.536	34.756	2009-8-18、24										1	ng/L
	TXM	St.2	JPN	135.529	34.7342	2009-8-18、24										NA	ng/L
	TXM	St.3	JPN	135.446	34.7105	2009-8-18、24										0.8	ng/L
	TXM	St.4	JPN	135.416	34.6893	2009-8-18、24										2.7	ng/L
	TXM	St.5	JPN	135.419	34.6831	2009-8-18、24										1.7	ng/L
	TXM	St.6	JPN	135.583	34.7003	2009-8-18、24										1.8	ng/L
	TXM	St.7	JPN	135.579	34.6968	2009-8-18、24										2.7	ng/L
	TXM	St.8	JPN	135.556	34.6879	2009-8-18、24										NA	ng/L
	TXM	St.9	JPN	135.554	34.6872	2009-8-18、24										ND	ng/L
	TXM	St.10	JPN	135.54	34.6892	2009-8-18、24										2.3	ng/L
	TXM	St.11	JPN	135.541	34.6879	2009-8-18、24										3.1	ng/L
	TXM	St.12	JPN	135.54	34.6618	2009-8-18、24										3.2	ng/L
	TXM	St.13	JPN	135.522	34.7	2009-8-18、24										0.7	ng/L
	TXM	St.14	JPN	135.521	34.6919	2009-8-18、24										ND	ng/L
	TXM	St.15	JPN	135.513	34.6917	2009-8-18、24										0.7	ng/L
	TXM	St.16	JPN	135.51	34.6908	2009-8-18、24										ND	ng/L
	TXM	St.17	JPN	135.511	34.6823	2009-8-18、24										2.2	ng/L
	TXM	St.18	JPN	135.497	34.669	2009-8-18、24										2.3	ng/L
	TXM	St.19	JPN	135.458	34.6777	2009-8-18、24										1	ng/L
	TXM	St.20	JPN	135.429	34.6578	2009-8-18、24										ND	ng/L
	TXM	St.21	JPN	135.462	34.6567	2009-8-18、24										ND	ng/L
	TXM	St.22	JPN	135.475	34.6313	2009-8-18、24										ND	ng/L
	TXM	St.23	JPN	135.458	34.6331	2009-8-18、24										0.7	ng/L
	TXM	St.24	JPN	135.448	34.6276	2009-8-18、24										1.8	ng/L
	TXM	St.25	JPN	135.459	34.6163	2009-8-18、24										0.8	ng/L
	TXM	St.26	JPN	135.393	34.6414	2009-8-18、24										0.8	ng/L
	ACE	St.1	JPN	135.536	34.756	2010-5-26、28										ND	ng/L
	ACE	St.2	JPN	135.529	34.7342	2010-5-26、28										NA	ng/L
	ACE	St.3	JPN	135.446	34.7105	2010-5-26、28										ND	ng/L
	ACE	St.4	JPN	135.416	34.6893	2010-5-26、28										NA	ng/L
	ACE	St.5	JPN	135.419	34.6831	2010-5-26、28										NA	ng/L
	ACE	St.6	JPN	135.583	34.7003	2010-5-26、28										ND	ng/L
	ACE	St.7	JPN	135.579	34.6968	2010-5-26、28										1.4	ng/L
	ACE	St.8	JPN	135.556	34.6879	2010-5-26、28										1.4	ng/L
	ACE	St.9	JPN	135.554	34.6872	2010-5-26、28										ND	ng/L
	ACE	St.10	JPN	135.54	34.6892	2010-5-26、28										ND	ng/L
	ACE	St.11	JPN	135.541	34.6879	2010-5-26、28										ND	ng/L
	ACE	St.12	JPN	135.54	34.6618	2010-5-26、28										ND	ng/L
	ACE	St.13	JPN	135.522	34.7	2010-5-26、28										ND	ng/L
	ACE	St.14	JPN	135.521	34.6919	2010-5-26、28										ND	ng/L
	ACE	St.15	JPN	135.513	34.6917	2010-5-26、28										ND	ng/L
	ACE	St.16	JPN	135.51	34.6908	2010-5-26、28										ND	ng/L
	ACE	St.17	JPN	135.511	34.6823	2010-5-26、28										ND	ng/L
	ACE	St.18	JPN	135.497	34.669	2010-5-26、28										ND	ng/L
	ACE	St.19	JPN	135.458	34.6777	2010-5-26、28										ND	ng/L
	ACE	St.20	JPN	135.429	34.6578	2010-5-26、28										ND	ng/L
	ACE	St.21	JPN	135.462	34.6567	2010-5-26、28										ND	ng/L
	ACE	St.22	JPN	135.475	34.6313	2010-5-26、28										ND	ng/L
	ACE	St.23	JPN	135.458	34.6331	2010-5-26、28										ND	ng/L
	ACE	St.24	JPN	135.448	34.6276	2010-5-26、28										NA	ng/L
	ACE	St.25	JPN	135.459	34.6163	2010-5-26、28										ND	ng/L
	ACE	St.26	JPN	135.393	34.6414	2010-5-26、28										NA	ng/L
	CLO	St.1	JPN	135.536	34.756	2010-5-26、28										3.7	ng/L
	CLO	St.2	JPN	135.529	34.7342	2010-5-26、28										NA	ng/L
	CLO	St.3	JPN	135.446	34.7105	2010-5-26、28										3.4	ng/L
	CLO	St.4	JPN	135.416	34.6893	2010-5-26、28										NA	ng/L
	CLO	St.5	JPN	135.419	34.6831	2010-5-26、28										NA	ng/L
	CLO	St.6	JPN	135.583	34.7003	2010-5-26、28										2.9	ng/L
	CLO	St.7	JPN	135.579	34.6968	2010-5-26、28										5.7	ng/L
	CLO	St.8	JPN	135.556	34.6879	2010-5-26、28										1	ng/L
	CLO	St.9	JPN	135.554	34.6872	2010-5-26、28										2.5	ng/L
	CLO	St.10	JPN	135.54	34.6892	2010-5-26、28										1.5	ng/L
	CLO	St.11	JPN	135.541	34.6879	2010-5-26、28										1.4	ng/L
	CLO	St.12	JPN	135.54	34.6618	2010-5-26、28										1.7	ng/L
	CLO	St.13	JPN	135.522	34.7	2010-5-26、28										7.8	ng/L
	CLO	St.14	JPN	135.521	34.6919	2010-5-26、28										2.3	ng/L
	CLO	St.15	JPN	135.513	34.6917	2010-5-26、28										6.2	ng/L
	CLO	St.16	JPN	135.51	34.6908	2010-5-26、28										4.9	ng/L
	CLO	St.17	JPN	135.511	34.6823	2010-5-26、28										4.9	ng/L
	CLO	St.18	JPN	135.497	34.669	2010-5-26、28										1.2	ng/L
	CLO	St.19	JPN	135.458	34.6777	2010-5-26、28										3.5	ng/L
	CLO	St.20	JPN	135.429	34.6578	2010-5-26、28										3	ng/L
	CLO	St.21	JPN	135.462	34.6567	2010-5-26、28										3.4	ng/L
	CLO	St.22	JPN	135.475	34.6313	2010-5-26、28										3.4	ng/L
	CLO	St.23	JPN	135.458	34.6331	2010-5-26、28										3.7	ng/L
	CLO	St.24	JPN	135.448	34.6276	2010-5-26、28										NA	ng/L
	CLO	St.25	JPN	135.459	34.6163	2010-5-26、28										1.5	ng/L
	CLO	St.26	JPN	135.393	34.6414	2010-5-26、28										NA	ng/L
	DIN	St.1	JPN	135.536	34.756	2010-5-26、28										6.7	ng/L
	DIN	St.2	JPN	135.529	34.7342	2010-5-26、28										NA	ng/L
	DIN	St.3	JPN	135.446	34.7105	2010-5-26、28										4.9	ng/L
	DIN	St.4	JPN	135.416	34.6893	2010-5-26、28										NA	ng/L
	DIN	St.5	JPN	135.419	34.6831	2010-5-26、28										NA	ng/L
	DIN	St.6	JPN	135.583	34.7003	2010-5-26、28										8.9	ng/L
	DIN	St.7	JPN	135.579	34.6968	2010-5-26、28										21	ng/L
	DIN	St.8	JPN	135.556	34.6879	2010-5-26、28										30	ng/L
	DIN	St.9	JPN	135.554	34.6872	2010-5-26、28										21	ng/L
	DIN	St.10	JPN	135.54	34.6892	2010-5-26、28										31	ng/L
	DIN	St.11	JPN	135.541	34.6879	2010-5-26、28										18	ng/L
	DIN	St.12	JPN	135.54	34.6618	2010-5-26、28										16	ng/L
	DIN	St.13	JPN	135.522	34.7	2010-5-26、28										6.8	ng/L
	DIN	St.14	JPN	135.521	34.6919	2010-5-26、28										20	ng/L
	DIN	St.15	JPN	135.513	34.6917	2010-5-26、28										11	ng/L
	DIN	St.16	JPN	135.51	34.6908	2010-5-26、28										12	ng/L
	DIN	St.17	JPN	135.511	34.6823	2010-5-26、28										10	ng/L
	DIN	St.18	JPN	135.497	34.669	2010-5-26、28										6.7	ng/L
	DIN	St.19	JPN	135.458	34.6777	2010-5-26、28										6.5	ng/L
	DIN	St.20	JPN	135.429	34.6578	2010-5-26、28										3.7	ng/L
	DIN	St.21	JPN	135.462	34.6567	2010-5-26、28										5.4	ng/L
	DIN	St.22	JPN	135.475	34.6313	2010-5-26、28										3.7	ng/L
	DIN	St.23	JPN	135.458	34.6331	2010-5-26、28										6.3	ng/L
	DIN	St.24	JPN	135.448	34.6276	2010-5-26、28										NA	ng/L
	DIN	St.25	JPN	135.459	34.6163	2010-5-26、28										5.8	ng/L
	DIN	St.26	JPN	135.393	34.6414	2010-5-26、28										NA	ng/L
	IMI	St.1	JPN	135.536	34.756	2010-5-26、28										6.3	ng/L
	IMI	St.2	JPN	135.529	34.7342	2010-5-26、28										NA	ng/L
	IMI	St.3	JPN	135.446	34.7105	2010-5-26、28										10	ng/L
	IMI	St.4	JPN	135.416	34.6893	2010-5-26、28										NA	ng/L
	IMI	St.5	JPN	135.419	34.6831	2010-5-26、28										NA	ng/L
	IMI	St.6	JPN	135.583	34.7003	2010-5-26、28										ND	ng/L
	IMI	St.7	JPN	135.579	34.6968	2010-5-26、28										25	ng/L
	IMI	St.8	JPN	135.556	34.6879	2010-5-26、28										19	ng/L
	IMI	St.9	JPN	135.554	34.6872	2010-5-26、28										16	ng/L
	IMI	St.10	JPN	135.54	34.6892	2010-5-26、28										15	ng/L
	IMI	St.11	JPN	135.541	34.6879	2010-5-26、28										12	ng/L
	IMI	St.12	JPN	135.54	34.6618	2010-5-26、28										8.9	ng/L
	IMI	St.13	JPN	135.522	34.7	2010-5-26、28										6.5	ng/L
	IMI	St.14	JPN	135.521	34.6919	2010-5-26、28										16	ng/L
	IMI	St.15	JPN	135.513	34.6917	2010-5-26、28										9.1	ng/L
	IMI	St.16	JPN	135.51	34.6908	2010-5-26、28										13	ng/L
	IMI	St.17	JPN	135.511	34.6823	2010-5-26、28										11	ng/L
	IMI	St.18	JPN	135.497	34.669	2010-5-26、28										4.4	ng/L
	IMI	St.19	JPN	135.458	34.6777	2010-5-26、28										5.7	ng/L
	IMI	St.20	JPN	135.429	34.6578	2010-5-26、28										3.7	ng/L
	IMI	St.21	JPN	135.462	34.6567	2010-5-26、28										4.3	ng/L
	IMI	St.22	JPN	135.475	34.6313	2010-5-26、28										4.9	ng/L
	IMI	St.23	JPN	135.458	34.6331	2010-5-26、28										5.4	ng/L
	IMI	St.24	JPN	135.448	34.6276	2010-5-26、28										NA	ng/L
	IMI	St.25	JPN	135.459	34.6163	2010-5-26、28										4.9	ng/L
	IMI	St.26	JPN	135.393	34.6414	2010-5-26、28										NA	ng/L
	NIT	St.1	JPN	135.536	34.756	2010-5-26、28										ND	ng/L
	NIT	St.2	JPN	135.529	34.7342	2010-5-26、28										NA	ng/L
	NIT	St.3	JPN	135.446	34.7105	2010-5-26、28										ND	ng/L
	NIT	St.4	JPN	135.416	34.6893	2010-5-26、28										NA	ng/L
	NIT	St.5	JPN	135.419	34.6831	2010-5-26、28										NA	ng/L
	NIT	St.6	JPN	135.583	34.7003	2010-5-26、28										ND	ng/L
	NIT	St.7	JPN	135.579	34.6968	2010-5-26、28										ND	ng/L
	NIT	St.8	JPN	135.556	34.6879	2010-5-26、28										ND	ng/L
	NIT	St.9	JPN	135.554	34.6872	2010-5-26、28										ND	ng/L
	NIT	St.10	JPN	135.54	34.6892	2010-5-26、28										ND	ng/L
	NIT	St.11	JPN	135.541	34.6879	2010-5-26、28										ND	ng/L
	NIT	St.12	JPN	135.54	34.6618	2010-5-26、28										ND	ng/L
	NIT	St.13	JPN	135.522	34.7	2010-5-26、28										ND	ng/L
	NIT	St.14	JPN	135.521	34.6919	2010-5-26、28										ND	ng/L
	NIT	St.15	JPN	135.513	34.6917	2010-5-26、28										ND	ng/L
	NIT	St.16	JPN	135.51	34.6908	2010-5-26、28										ND	ng/L
	NIT	St.17	JPN	135.511	34.6823	2010-5-26、28										ND	ng/L
	NIT	St.18	JPN	135.497	34.669	2010-5-26、28										ND	ng/L
	NIT	St.19	JPN	135.458	34.6777	2010-5-26、28										ND	ng/L
	NIT	St.20	JPN	135.429	34.6578	2010-5-26、28										ND	ng/L
	NIT	St.21	JPN	135.462	34.6567	2010-5-26、28										ND	ng/L
	NIT	St.22	JPN	135.475	34.6313	2010-5-26、28										ND	ng/L
	NIT	St.23	JPN	135.458	34.6331	2010-5-26、28										ND	ng/L
	NIT	St.24	JPN	135.448	34.6276	2010-5-26、28										NA	ng/L
	NIT	St.25	JPN	135.459	34.6163	2010-5-26、28										ND	ng/L
	NIT	St.26	JPN	135.393	34.6414	2010-5-26、28										NA	ng/L
	TXM	St.1	JPN	135.536	34.756	2010-5-26、28										2.6	ng/L
	TXM	St.2	JPN	135.529	34.7342	2010-5-26、28										NA	ng/L
	TXM	St.3	JPN	135.446	34.7105	2010-5-26、28										3	ng/L
	TXM	St.4	JPN	135.416	34.6893	2010-5-26、28										NA	ng/L
	TXM	St.5	JPN	135.419	34.6831	2010-5-26、28										NA	ng/L
	TXM	St.6	JPN	135.583	34.7003	2010-5-26、28										3.9	ng/L
	TXM	St.7	JPN	135.579	34.6968	2010-5-26、28										11	ng/L
	TXM	St.8	JPN	135.556	34.6879	2010-5-26、28										8.1	ng/L
	TXM	St.9	JPN	135.554	34.6872	2010-5-26、28										3.5	ng/L
	TXM	St.10	JPN	135.54	34.6892	2010-5-26、28										3.3	ng/L
	TXM	St.11	JPN	135.541	34.6879	2010-5-26、28										2.6	ng/L
	TXM	St.12	JPN	135.54	34.6618	2010-5-26、28										4.5	ng/L
	TXM	St.13	JPN	135.522	34.7	2010-5-26、28										4.4	ng/L
	TXM	St.14	JPN	135.521	34.6919	2010-5-26、28										6.8	ng/L
	TXM	St.15	JPN	135.513	34.6917	2010-5-26、28										5.1	ng/L
	TXM	St.16	JPN	135.51	34.6908	2010-5-26、28										7.6	ng/L
	TXM	St.17	JPN	135.511	34.6823	2010-5-26、28										4	ng/L
	TXM	St.18	JPN	135.497	34.669	2010-5-26、28										1.5	ng/L
	TXM	St.19	JPN	135.458	34.6777	2010-5-26、28										3.4	ng/L
	TXM	St.20	JPN	135.429	34.6578	2010-5-26、28										2.9	ng/L
	TXM	St.21	JPN	135.462	34.6567	2010-5-26、28										2.2	ng/L
	TXM	St.22	JPN	135.475	34.6313	2010-5-26、28										2.6	ng/L
	TXM	St.23	JPN	135.458	34.6331	2010-5-26、28										3.1	ng/L
	TXM	St.24	JPN	135.448	34.6276	2010-5-26、28										NA	ng/L
	TXM	St.25	JPN	135.459	34.6163	2010-5-26、28										3.2	ng/L
	TXM	St.26	JPN	135.393	34.6414	2010-5-26、28										NA	ng/L
Extraction of neonicotinoid insecticides from environmental water samples with magnetic graphene nanoparticles as adsorbent followed by determination with HPLC	TXM	Reservoir water	CHN	114.643	39.0953											ND	mg/mL
	TXM	Sea water	CHN	121.559	36.8509											ND	mg/mL
	TXM	River water	CHN	115.768	39.045											ND	mg/mL
	IMI	Reservoir water	CHN	114.643	39.0953											ND	mg/mL
	IMI	Sea water	CHN	121.559	36.8509											ND	mg/mL
	IMI	River water	CHN	115.768	39.045											ND	mg/mL
	ACE	Reservoir water	CHN	114.643	39.0953											ND	mg/mL
	ACE	Sea water	CHN	121.559	36.8509											ND	mg/mL
	ACE	River water	CHN	115.768	39.045											ND	mg/mL
	THI	Reservoir water	CHN	114.643	39.0953											ND	mg/mL
	THI	Sea water	CHN	121.559	36.8509											0.09	mg/mL
	THI	River water	CHN	115.768	39.045											ND	mg/mL
Factors influencing the occurrence and distribution of neonicotinoid insecticides in surface waters of southern Ontario, Canada	ACE	Twenty Mile Creek	CAN	-79.3698	43.1618	2012-2014 4-12							0.15	0.045		0.21	ng/L
	ACE	Two Mile Creek	CAN	-79.103	43.258	2012-2014 4-12										20.8	ng/L
	ACE	Four Mile Creek	CAN	-79.1204	43.2558	2012-2014 4-12							0.15	0.121		14.3	ng/L
	ACE	Big Creek	CAN	-80.5381	42.6434	2012-2014 4-12										ND	ng/L
	ACE	West Holland River	CAN	-79.546	44.1127	2012-2014 4-12										2.7	ng/L
	ACE	Indian Creek	CAN	-79.8062	43.3132	2012-2014 4-12										0.34	ng/L
	ACE	Innisfil Creek	CAN	-79.7912	44.13	2012-2014 4-12										ND	ng/L
	ACE	Lebo Drain	CAN	-82.5019	42.0359	2012-2014 4-12										59.3	ng/L
	ACE	Nissouri Creek	CAN	-80.9899	43.0898	2012-2014 4-12										ND	ng/L
	ACE	Nottawasaga River	CAN	-79.8225	44.2484	2012-2014 4-12										ND	ng/L
	ACE	Spring Creek	CAN	-81.6179	45.0672	2012-2014 4-12										ND	ng/L
	ACE	Sturgeon Creek	CAN	-82.5609	42.0213	2012-2014 4-12										21.6	ng/L
	ACE	Sydenham River	CAN	-81.956	42.7169	2012-2014 4-12							-0.025	0.145		0.26	ng/L
	ACE	Thames River	CAN	-82.0889	42.4934	2012-2014 4-12										ND	ng/L
	ACE	Prudhomme Creek	CAN	-79.394	43.1927	2012-2014 4-12										9.58	ng/L
	CLO	Twenty Mile Creek	CAN	-79.3698	43.1618	2012-2014 4-12							0.225	0.251		31.6	ng/L
	CLO	Two Mile Creek	CAN	-79.103	43.258	2012-2014 4-12										13.8	ng/L
	CLO	Four Mile Creek	CAN	-79.1204	43.2558	2012-2014 4-12							0.105	0.12		13.3	ng/L
	CLO	Big Creek	CAN	-80.5381	42.6434	2012-2014 4-12										4.19	ng/L
	CLO	West Holland River	CAN	-79.546	44.1127	2012-2014 4-12										7.78	ng/L
	CLO	Indian Creek	CAN	-79.8062	43.3132	2012-2014 4-12										2.65	ng/L
	CLO	Innisfil Creek	CAN	-79.7912	44.13	2012-2014 4-12										7.28	ng/L
	CLO	Lebo Drain	CAN	-82.5019	42.0359	2012-2014 4-12										41.8	ng/L
	CLO	Nissouri Creek	CAN	-80.9899	43.0898	2012-2014 4-12										22.8	ng/L
	CLO	Nottawasaga River	CAN	-79.8225	44.2484	2012-2014 4-12										11.1	ng/L
	CLO	Spring Creek	CAN	-81.6179	45.0672	2012-2014 4-12										ND	ng/L
	CLO	Sturgeon Creek	CAN	-82.5609	42.0213	2012-2014 4-12										5.17	ng/L
	CLO	Sydenham River	CAN	-81.956	42.7169	2012-2014 4-12							0.345	-0.003		28.7	ng/L
	CLO	Thames River	CAN	-82.0889	42.4934	2012-2014 4-12										17.5	ng/L
	CLO	Prudhomme Creek	CAN	-79.394	43.1927	2012-2014 4-12										22.3	ng/L
	IMI	Twenty Mile Creek	CAN	-79.3698	43.1618	2012-2014 4-12							0.346	0.08		11.8	ng/L
	IMI	Two Mile Creek	CAN	-79.103	43.258	2012-2014 4-12										113	ng/L
	IMI	Four Mile Creek	CAN	-79.1204	43.2558	2012-2014 4-12							0.136	-0.048		30.7	ng/L
	IMI	Big Creek	CAN	-80.5381	42.6434	2012-2014 4-12										2.53	ng/L
	IMI	West Holland River	CAN	-79.546	44.1127	2012-2014 4-12										21.7	ng/L
	IMI	Indian Creek	CAN	-79.8062	43.3132	2012-2014 4-12										4.32	ng/L
	IMI	Innisfil Creek	CAN	-79.7912	44.13	2012-2014 4-12										5.25	ng/L
	IMI	Lebo Drain	CAN	-82.5019	42.0359	2012-2014 4-12										856	ng/L
	IMI	Nissouri Creek	CAN	-80.9899	43.0898	2012-2014 4-12										1.82	ng/L
	IMI	Nottawasaga River	CAN	-79.8225	44.2484	2012-2014 4-12										4.08	ng/L
	IMI	Spring Creek	CAN	-81.6179	45.0672	2012-2014 4-12										-	ng/L
	IMI	Sturgeon Creek	CAN	-82.5609	42.0213	2012-2014 4-12										1390	ng/L
	IMI	Sydenham River	CAN	-81.956	42.7169	2012-2014 4-12							-0.085	-0.045		5.49	ng/L
	IMI	Thames River	CAN	-82.0889	42.4934	2012-2014 4-12										4.56	ng/L
	IMI	Prudhomme Creek	CAN	-79.394	43.1927	2012-2014 4-12										19.4	ng/L
	THI	Twenty Mile Creek	CAN	-79.3698	43.1618	2012-2014 4-12							0.264	0.28		0.52	ng/L
	THI	Two Mile Creek	CAN	-79.103	43.258	2012-2014 4-12										2.71	ng/L
	THI	Four Mile Creek	CAN	-79.1204	43.2558	2012-2014 4-12							0.219	0.077		0.72	ng/L
	THI	Big Creek	CAN	-80.5381	42.6434	2012-2014 4-12										-	ng/L
	THI	West Holland River	CAN	-79.546	44.1127	2012-2014 4-12										-	ng/L
	THI	Indian Creek	CAN	-79.8062	43.3132	2012-2014 4-12										0.89	ng/L
	THI	Innisfil Creek	CAN	-79.7912	44.13	2012-2014 4-12										-	ng/L
	THI	Lebo Drain	CAN	-82.5019	42.0359	2012-2014 4-12										2.19	ng/L
	THI	Nissouri Creek	CAN	-80.9899	43.0898	2012-2014 4-12										-	ng/L
	THI	Nottawasaga River	CAN	-79.8225	44.2484	2012-2014 4-12										-	ng/L
	THI	Spring Creek	CAN	-81.6179	45.0672	2012-2014 4-12										-	ng/L
	THI	Sturgeon Creek	CAN	-82.5609	42.0213	2012-2014 4-12										2.81	ng/L
	THI	Sydenham River	CAN	-81.956	42.7169	2012-2014 4-12							0.022	-0.063		-	ng/L
	THI	Thames River	CAN	-82.0889	42.4934	2012-2014 4-12										-	ng/L
	THI	Prudhomme Creek	CAN	-79.394	43.1927	2012-2014 4-12										46.2	ng/L
	TXM	Twenty Mile Creek	CAN	-79.3698	43.1618	2012-2014 4-12							0.079	-0.108		172	ng/L
	TXM	Two Mile Creek	CAN	-79.103	43.258	2012-2014 4-12										5.79	ng/L
	TXM	Four Mile Creek	CAN	-79.1204	43.2558	2012-2014 4-12							0.096	0.086		17.8	ng/L
	TXM	Big Creek	CAN	-80.5381	42.6434	2012-2014 4-12										4.69	ng/L
	TXM	West Holland River	CAN	-79.546	44.1127	2012-2014 4-12										21.2	ng/L
	TXM	Indian Creek	CAN	-79.8062	43.3132	2012-2014 4-12										7.11	ng/L
	TXM	Innisfil Creek	CAN	-79.7912	44.13	2012-2014 4-12										20.1	ng/L
	TXM	Lebo Drain	CAN	-82.5019	42.0359	2012-2014 4-12										137	ng/L
	TXM	Nissouri Creek	CAN	-80.9899	43.0898	2012-2014 4-12										4.28	ng/L
	TXM	Nottawasaga River	CAN	-79.8225	44.2484	2012-2014 4-12										23.5	ng/L
	TXM	Spring Creek	CAN	-81.6179	45.0672	2012-2014 4-12										-	ng/L
	TXM	Sturgeon Creek	CAN	-82.5609	42.0213	2012-2014 4-12										12.5	ng/L
	TXM	Sydenham River	CAN	-81.956	42.7169	2012-2014 4-12							0.168	-0.201		58.6	ng/L
	TXM	Thames River	CAN	-82.0889	42.4934	2012-2014 4-12										24.9	ng/L
	TXM	Prudhomme Creek	CAN	-79.394	43.1927	2012-2014 4-12										15.3	ng/L
First national-scale reconnaissance of neonicotinoid insecticides in streams across the USA	ACE	02350524	USA	-83.5326	39.7279	2013-7-23									25	ND	ng/L
	ACE	06893500	USA	-90.5652	43.1854	2014-2-11									9	ND	ng/L
	ACE	252414080333200	USA	-80.3332	25.2414	2013-4-9									65	ND	ng/L
	ACE	05537000	USA	-88.1543	41.7005	2014-2-11									1	ND	ng/L
	ACE	07159735	USA	-97.2677	37.7412	2012-11-28									5	ND	ng/L
	ACE	452340122251000	USA	-122.251	45.234	2014-1-13									19	ND	ng/L
	ACE	01472705	USA	-75.2829	40.4033	2014-1-14									16	ND	ng/L
	ACE	02160326	USA	-82.21	34.7036	2014-5-19									0	ND	ng/L
	ACE	04234000	USA	-76.5064	42.4528	2014-6-9									16	ND	ng/L
	ACE	12211900	USA	-83.9077	38.339	2013-12-10									26	ND	ng/L
	ACE	05485605	USA	-93.7163	41.6951	2012-11-19									76	ND	ng/L
	ACE	12211900	USA	-78.6096	38.618	2014-4-15									2	ND	ng/L
	ACE	02281200	USA	-80.4169	26.4234	2013-3-12									93	ND	ng/L
	ACE	382054085332600	USA	-85.3326	38.2054	2014-5-20									2	ND	ng/L
	ACE	01391100	USA	-74.152	40.9885	2012-11-28									0	ND	ng/L
	ACE	01452040	USA	-75.7375	40.6647	2013-6-17									22	ND	ng/L
	ACE	03220000	USA	-80.6833	41.0871	2013-6-4									63	ND	ng/L
	ACE	10255550	USA	-115.668	33.1059	2013-3-5									14	ND	ng/L
	ACE	06770195	USA	-99.2544	40.5941	2013-6-10									88	ND	ng/L
	ACE	07060710	USA	-92.1564	35.9534	2014-1-6									0	ND	ng/L
	ACE	01409480	USA	-74.6597	39.6919	2012-11-10									0	ND	ng/L
	ACE	50055410	USA	-68.4472	17.4892	2013-3-19									0	ND	ng/L
	ACE	181847065391301	USA	-65.3913	18.1847	2013-3-25									0	ND	ng/L
	ACE	324305097101900	USA	-97.1019	32.4305	2013-5-13									0	ND	ng/L
	ACE	13210360	USA	-117.026	43.8274	2013-6-18									39	ND	ng/L
	ACE	11074000	USA	-117.998	33.6938	2014-3-25									3	ND	ng/L
	ACE	02335870	USA	-84.5289	33.897	2013-4-16									0	ND	ng/L
	ACE	05451210	USA	-93.6502	42.43	2013-5-20									85	ND	ng/L
	ACE	05373005	USA	-92.5305	44.1027	2012-12-5									51	ND	ng/L
	ACE	394847104570700	USA	-104.571	39.4847	2012-12-11									0	ND	ng/L
	ACE	05340041	USA	-92.893	45.5401	2012-12-4									11	ND	ng/L
	ACE	05014300	USA	-113.711	48.7958	2013-8-28									0	ND	ng/L
	ACE	385531121532001	USA	-121.532	38.5531	2013-6-18									94	ND	ng/L
	ACE	364554121453401	USA	-121.453	36.4554	2014-3-3									26	39.5	ng/L
	ACE	08057410	USA	-94.7121	29.7431	2012-12-4									6	ND	ng/L
	ACE	01421640	USA	-75.294	42.1949	2012-11-19									7	ND	ng/L
	ACE	09505800	USA	-111.758	34.5424	2014-1-15									0	ND	ng/L
	ACE	14201300	USA	-122.813	45.0895	2014-5-19									52	ND	ng/L
	CLO	02350524	USA	-83.5326	39.7279	2013-7-23									25	ND	ng/L
	CLO	06893500	USA	-90.5652	43.1854	2014-2-11									9	ND	ng/L
	CLO	252414080333200	USA	-80.3332	25.2414	2013-4-9									65	ND	ng/L
	CLO	05537000	USA	-88.1543	41.7005	2014-2-11									1	ND	ng/L
	CLO	07159735	USA	-97.2677	37.7412	2012-11-28									5	ND	ng/L
	CLO	452340122251000	USA	-122.251	45.234	2014-1-13									19	ND	ng/L
	CLO	01472705	USA	-75.2829	40.4033	2014-1-14									16	ND	ng/L
	CLO	02160326	USA	-82.21	34.7036	2014-5-19									0	ND	ng/L
	CLO	04234000	USA	-76.5064	42.4528	2014-6-9									16	20	ng/L
	CLO	12211900	USA	-83.9077	38.339	2013-12-10									26	ND	ng/L
	CLO	05485605	USA	-93.7163	41.6951	2012-11-19									76	9.4	ng/L
	CLO	12211900	USA	-78.6096	38.618	2014-4-15									2	ND	ng/L
	CLO	02281200	USA	-80.4169	26.4234	2013-3-12									93	ND	ng/L
	CLO	382054085332600	USA	-85.3326	38.2054	2014-5-20									2	ND	ng/L
	CLO	01391100	USA	-74.152	40.9885	2012-11-28									0	ND	ng/L
	CLO	01452040	USA	-75.7375	40.6647	2013-6-17									22	ND	ng/L
	CLO	03220000	USA	-80.6833	41.0871	2013-6-4									63	66.3	ng/L
	CLO	10255550	USA	-115.668	33.1059	2013-3-5									14	ND	ng/L
	CLO	06770195	USA	-99.2544	40.5941	2013-6-10									88	2.9	ng/L
	CLO	07060710	USA	-92.1564	35.9534	2014-1-6									0	ND	ng/L
	CLO	01409480	USA	-74.6597	39.6919	2012-11-10									0	ND	ng/L
	CLO	50055410	USA	-68.4472	17.4892	2013-3-19									0	ND	ng/L
	CLO	181847065391301	USA	-65.3913	18.1847	2013-3-25									0	ND	ng/L
	CLO	324305097101900	USA	-97.1019	32.4305	2013-5-13									0	ND	ng/L
	CLO	13210360	USA	-117.026	43.8274	2013-6-18									39	11.3	ng/L
	CLO	11074000	USA	-117.998	33.6938	2014-3-25									3	ND	ng/L
	CLO	02335870	USA	-84.5289	33.897	2013-4-16									0	ND	ng/L
	CLO	05451210	USA	-93.6502	42.43	2013-5-20									85	20.5	ng/L
	CLO	05373005	USA	-92.5305	44.1027	2012-12-5									51	ND	ng/L
	CLO	394847104570700	USA	-104.571	39.4847	2012-12-11									0	ND	ng/L
	CLO	05340041	USA	-92.893	45.5401	2012-12-4									11	ND	ng/L
	CLO	05014300	USA	-113.711	48.7958	2013-8-28									0	ND	ng/L
	CLO	385531121532001	USA	-121.532	38.5531	2013-6-18									94	2.6	ng/L
	CLO	364554121453401	USA	-121.453	36.4554	2014-3-3									26	38.2	ng/L
	CLO	08057410	USA	-94.7121	29.7431	2012-12-4									6	ND	ng/L
	CLO	01421640	USA	-75.294	42.1949	2012-11-19									7	ND	ng/L
	CLO	09505800	USA	-111.758	34.5424	2014-1-15									0	3.3	ng/L
	CLO	14201300	USA	-122.813	45.0895	2014-5-19									52	ND	ng/L
	DIN	02350524	USA	-83.5326	39.7279	2013-7-23									25	ND	ng/L
	DIN	06893500	USA	-90.5652	43.1854	2014-2-11									9	ND	ng/L
	DIN	252414080333200	USA	-80.3332	25.2414	2013-4-9									65	ND	ng/L
	DIN	05537000	USA	-88.1543	41.7005	2014-2-11									1	ND	ng/L
	DIN	07159735	USA	-97.2677	37.7412	2012-11-28									5	12.5	ng/L
	DIN	452340122251000	USA	-122.251	45.234	2014-1-13									19	ND	ng/L
	DIN	01472705	USA	-75.2829	40.4033	2014-1-14									16	ND	ng/L
	DIN	02160326	USA	-82.21	34.7036	2014-5-19									0	ND	ng/L
	DIN	04234000	USA	-76.5064	42.4528	2014-6-9									16	ND	ng/L
	DIN	12211900	USA	-83.9077	38.339	2013-12-10									26	ND	ng/L
	DIN	05485605	USA	-93.7163	41.6951	2012-11-19									76	6.4	ng/L
	DIN	12211900	USA	-78.6096	38.618	2014-4-15									2	ND	ng/L
	DIN	02281200	USA	-80.4169	26.4234	2013-3-12									93	ND	ng/L
	DIN	382054085332600	USA	-85.3326	38.2054	2014-5-20									2	ND	ng/L
	DIN	01391100	USA	-74.152	40.9885	2012-11-28									0	ND	ng/L
	DIN	01452040	USA	-75.7375	40.6647	2013-6-17									22	ND	ng/L
	DIN	03220000	USA	-80.6833	41.0871	2013-6-4									63	ND	ng/L
	DIN	10255550	USA	-115.668	33.1059	2013-3-5									14	ND	ng/L
	DIN	06770195	USA	-99.2544	40.5941	2013-6-10									88	ND	ng/L
	DIN	07060710	USA	-92.1564	35.9534	2014-1-6									0	ND	ng/L
	DIN	01409480	USA	-74.6597	39.6919	2012-11-10									0	ND	ng/L
	DIN	50055410	USA	-68.4472	17.4892	2013-3-19									0	ND	ng/L
	DIN	181847065391301	USA	-65.3913	18.1847	2013-3-25									0	ND	ng/L
	DIN	324305097101900	USA	-97.1019	32.4305	2013-5-13									0	ND	ng/L
	DIN	13210360	USA	-117.026	43.8274	2013-6-18									39	ND	ng/L
	DIN	11074000	USA	-117.998	33.6938	2014-3-25									3	ND	ng/L
	DIN	02335870	USA	-84.5289	33.897	2013-4-16									0	ND	ng/L
	DIN	05451210	USA	-93.6502	42.43	2013-5-20									85	ND	ng/L
	DIN	05373005	USA	-92.5305	44.1027	2012-12-5									51	ND	ng/L
	DIN	394847104570700	USA	-104.571	39.4847	2012-12-11									0	ND	ng/L
	DIN	05340041	USA	-92.893	45.5401	2012-12-4									11	ND	ng/L
	DIN	05014300	USA	-113.711	48.7958	2013-8-28									0	ND	ng/L
	DIN	385531121532001	USA	-121.532	38.5531	2013-6-18									94	ND	ng/L
	DIN	364554121453401	USA	-121.453	36.4554	2014-3-3									26	13.8	ng/L
	DIN	08057410	USA	-94.7121	29.7431	2012-12-4									6	6.6	ng/L
	DIN	01421640	USA	-75.294	42.1949	2012-11-19									7	ND	ng/L
	DIN	09505800	USA	-111.758	34.5424	2014-1-15									0	ND	ng/L
	DIN	14201300	USA	-122.813	45.0895	2014-5-19									52	133.8	ng/L
	IMI	02350524	USA	-83.5326	39.7279	2013-7-23									25	ND	ng/L
	IMI	06893500	USA	-90.5652	43.1854	2014-2-11									9	33	ng/L
	IMI	252414080333200	USA	-80.3332	25.2414	2013-4-9									65	ND	ng/L
	IMI	05537000	USA	-88.1543	41.7005	2014-2-11									1	19	ng/L
	IMI	07159735	USA	-97.2677	37.7412	2012-11-28									5	40.5	ng/L
	IMI	452340122251000	USA	-122.251	45.234	2014-1-13									19	ND	ng/L
	IMI	01472705	USA	-75.2829	40.4033	2014-1-14									16	ND	ng/L
	IMI	02160326	USA	-82.21	34.7036	2014-5-19									0	3.6	ng/L
	IMI	04234000	USA	-76.5064	42.4528	2014-6-9									16	ND	ng/L
	IMI	12211900	USA	-83.9077	38.339	2013-12-10									26	ND	ng/L
	IMI	05485605	USA	-93.7163	41.6951	2012-11-19									76	10.7	ng/L
	IMI	12211900	USA	-78.6096	38.618	2014-4-15									2	ND	ng/L
	IMI	02281200	USA	-80.4169	26.4234	2013-3-12									93	ND	ng/L
	IMI	382054085332600	USA	-85.3326	38.2054	2014-5-20									2	31.6	ng/L
	IMI	01391100	USA	-74.152	40.9885	2012-11-28									0	ND	ng/L
	IMI	01452040	USA	-75.7375	40.6647	2013-6-17									22	ND	ng/L
	IMI	03220000	USA	-80.6833	41.0871	2013-6-4									63	30.5	ng/L
	IMI	10255550	USA	-115.668	33.1059	2013-3-5									14	82	ng/L
	IMI	06770195	USA	-99.2544	40.5941	2013-6-10									88	ND	ng/L
	IMI	07060710	USA	-92.1564	35.9534	2014-1-6									0	ND	ng/L
	IMI	01409480	USA	-74.6597	39.6919	2012-11-10									0	ND	ng/L
	IMI	50055410	USA	-68.4472	17.4892	2013-3-19									0	5.8	ng/L
	IMI	181847065391301	USA	-65.3913	18.1847	2013-3-25									0	ND	ng/L
	IMI	324305097101900	USA	-97.1019	32.4305	2013-5-13									0	ND	ng/L
	IMI	13210360	USA	-117.026	43.8274	2013-6-18									39	ND	ng/L
	IMI	11074000	USA	-117.998	33.6938	2014-3-25									3	ND	ng/L
	IMI	02335870	USA	-84.5289	33.897	2013-4-16									0	8.4	ng/L
	IMI	05451210	USA	-93.6502	42.43	2013-5-20									85	ND	ng/L
	IMI	05373005	USA	-92.5305	44.1027	2012-12-5									51	ND	ng/L
	IMI	394847104570700	USA	-104.571	39.4847	2012-12-11									0	31	ng/L
	IMI	05340041	USA	-92.893	45.5401	2012-12-4									11	ND	ng/L
	IMI	05014300	USA	-113.711	48.7958	2013-8-28									0	ND	ng/L
	IMI	385531121532001	USA	-121.532	38.5531	2013-6-18									94	ND	ng/L
	IMI	364554121453401	USA	-121.453	36.4554	2014-3-3									26	142.8	ng/L
	IMI	08057410	USA	-94.7121	29.7431	2012-12-4									6	24.5	ng/L
	IMI	01421640	USA	-75.294	42.1949	2012-11-19									7	ND	ng/L
	IMI	09505800	USA	-111.758	34.5424	2014-1-15									0	ND	ng/L
	IMI	14201300	USA	-122.813	45.0895	2014-5-19									52	11.5	ng/L
	TXM	02350524	USA	-83.5326	39.7279	2013-7-23									25	ND	ng/L
	TXM	06893500	USA	-90.5652	43.1854	2014-2-11									9	ND	ng/L
	TXM	252414080333200	USA	-80.3332	25.2414	2013-4-9									65	ND	ng/L
	TXM	05537000	USA	-88.1543	41.7005	2014-2-11									1	ND	ng/L
	TXM	07159735	USA	-97.2677	37.7412	2012-11-28									5	ND	ng/L
	TXM	452340122251000	USA	-122.251	45.234	2014-1-13									19	ND	ng/L
	TXM	01472705	USA	-75.2829	40.4033	2014-1-14									16	ND	ng/L
	TXM	02160326	USA	-82.21	34.7036	2014-5-19									0	ND	ng/L
	TXM	04234000	USA	-76.5064	42.4528	2014-6-9									16	11.9	ng/L
	TXM	12211900	USA	-83.9077	38.339	2013-12-10									26	ND	ng/L
	TXM	05485605	USA	-93.7163	41.6951	2012-11-19									76	ND	ng/L
	TXM	12211900	USA	-78.6096	38.618	2014-4-15									2	ND	ng/L
	TXM	02281200	USA	-80.4169	26.4234	2013-3-12									93	ND	ng/L
	TXM	382054085332600	USA	-85.3326	38.2054	2014-5-20									2	ND	ng/L
	TXM	01391100	USA	-74.152	40.9885	2012-11-28									0	ND	ng/L
	TXM	01452040	USA	-75.7375	40.6647	2013-6-17									22	ND	ng/L
	TXM	03220000	USA	-80.6833	41.0871	2013-6-4									63	20.2	ng/L
	TXM	10255550	USA	-115.668	33.1059	2013-3-5									14	4.2	ng/L
	TXM	06770195	USA	-99.2544	40.5941	2013-6-10									88	ND	ng/L
	TXM	07060710	USA	-92.1564	35.9534	2014-1-6									0	ND	ng/L
	TXM	01409480	USA	-74.6597	39.6919	2012-11-10									0	ND	ng/L
	TXM	50055410	USA	-68.4472	17.4892	2013-3-19									0	ND	ng/L
	TXM	181847065391301	USA	-65.3913	18.1847	2013-3-25									0	ND	ng/L
	TXM	324305097101900	USA	-97.1019	32.4305	2013-5-13									0	ND	ng/L
	TXM	13210360	USA	-117.026	43.8274	2013-6-18									39	1.9	ng/L
	TXM	11074000	USA	-117.998	33.6938	2014-3-25									3	ND	ng/L
	TXM	02335870	USA	-84.5289	33.897	2013-4-16									0	ND	ng/L
	TXM	05451210	USA	-93.6502	42.43	2013-5-20									85	31.9	ng/L
	TXM	05373005	USA	-92.5305	44.1027	2012-12-5									51	ND	ng/L
	TXM	394847104570700	USA	-104.571	39.4847	2012-12-11									0	ND	ng/L
	TXM	05340041	USA	-92.893	45.5401	2012-12-4									11	ND	ng/L
	TXM	05014300	USA	-113.711	48.7958	2013-8-28									0	ND	ng/L
	TXM	385531121532001	USA	-121.532	38.5531	2013-6-18									94	2.8	ng/L
	TXM	364554121453401	USA	-121.453	36.4554	2014-3-3									26	190.4	ng/L
	TXM	08057410	USA	-94.7121	29.7431	2012-12-4									6	ND	ng/L
	TXM	01421640	USA	-75.294	42.1949	2012-11-19									7	ND	ng/L
	TXM	09505800	USA	-111.758	34.5424	2014-1-15									0	ND	ng/L
	TXM	14201300	USA	-122.813	45.0895	2014-5-19									52	20.9	ng/L
	ACE	02335870	USA	-84.5289	33.897	2011-10-4										ND	ng/L
	ACE	02335870	USA	-84.5289	33.897	2011-10-18										ND	ng/L
	ACE	02335870	USA	-84.5289	33.897	2011-11-2										ND	ng/L
	ACE	02335870	USA	-84.5289	33.897	2011-11-17										ND	ng/L
	ACE	02335870	USA	-84.5289	33.897	2011-12-5										ND	ng/L
	ACE	02335870	USA	-84.5289	33.897	2011-12-22										ND	ng/L
	ACE	02335870	USA	-84.5289	33.897	2012-1-5										ND	ng/L
	ACE	02335870	USA	-84.5289	33.897	2012-1-19										ND	ng/L
	ACE	02335870	USA	-84.5289	33.897	2012-2-2										ND	ng/L
	ACE	02335870	USA	-84.5289	33.897	2012-2-14										ND	ng/L
	ACE	02335870	USA	-84.5289	33.897	2012-3-6										ND	ng/L
	ACE	02335870	USA	-84.5289	33.897	2012-3-22										ND	ng/L
	ACE	02335870	USA	-84.5289	33.897	2012-4-9										ND	ng/L
	ACE	02335870	USA	-84.5289	33.897	2012-4-24										ND	ng/L
	ACE	02335870	USA	-84.5289	33.897	2012-5-8										ND	ng/L
	ACE	02335870	USA	-84.5289	33.897	2012-5--29										ND	ng/L
	ACE	02335870	USA	-84.5289	33.897	2012-6-14										ND	ng/L
	ACE	02335870	USA	-84.5289	33.897	2012-6-27										ND	ng/L
	ACE	02335870	USA	-84.5289	33.897	2012-7-10										ND	ng/L
	ACE	02335870	USA	-84.5289	33.897	2012-7-25										ND	ng/L
	ACE	02335870	USA	-84.5289	33.897	2012-8-9										ND	ng/L
	ACE	02335870	USA	-84.5289	33.897	2012-8-23										ND	ng/L
	ACE	02335870	USA	-84.5289	33.897	2012-9-6										4	ng/L
	ACE	02335870	USA	-84.5289	33.897	2012-9-20										ND	ng/L
	ACE	02335870	USA	-84.5289	33.897	2012-10-11										ND	ng/L
	ACE	02335870	USA	-84.5289	33.897	2012-10-25										ND	ng/L
	ACE	02335870	USA	-84.5289	33.897	2012-11-5										ND	ng/L
	ACE	02335870	USA	-84.5289	33.897	2012-11-19										ND	ng/L
	ACE	02335870	USA	-84.5289	33.897	2012-12-5										ND	ng/L
	ACE	02335870	USA	-84.5289	33.897	2012-12-18										ND	ng/L
	ACE	02335870	USA	-84.5289	33.897	2013-1-8										ND	ng/L
	ACE	02335870	USA	-84.5289	33.897	2013-1-22										ND	ng/L
	ACE	02335870	USA	-84.5289	33.897	2013-2-5										ND	ng/L
	ACE	02335870	USA	-84.5289	33.897	2013-2-19										ND	ng/L
	ACE	02335870	USA	-84.5289	33.897	2013-3-7										ND	ng/L
	ACE	02335870	USA	-84.5289	33.897	2013-3-21										ND	ng/L
	ACE	02335870	USA	-84.5289	33.897	2013-4-1										ND	ng/L
	ACE	02335870	USA	-84.5289	33.897	2013-4-16										ND	ng/L
	ACE	02335870	USA	-84.5289	33.897	2013-5-7										ND	ng/L
	ACE	02335870	USA	-84.5289	33.897	2013-5-23										ND	ng/L
	ACE	02335870	USA	-84.5289	33.897	2013-6-5										ND	ng/L
	ACE	02335870	USA	-84.5289	33.897	2013-6-27										ND	ng/L
	ACE	02335870	USA	-84.5289	33.897	2013-7-11										ND	ng/L
	ACE	02335870	USA	-84.5289	33.897	2013-7-22										ND	ng/L
	ACE	02335870	USA	-84.5289	33.897	2013-8-7										ND	ng/L
	ACE	02335870	USA	-84.5289	33.897	2013-8-26										ND	ng/L
	ACE	02335870	USA	-84.5289	33.897	2013-9-10										ND	ng/L
	ACE	02335870	USA	-84.5289	33.897	2013-9-13										ND	ng/L
	ACE	02338000	USA	-86.6455	32.7735	2011-9-9										ND	ng/L
	ACE	02338000	USA	-86.6455	32.7735	2011-10-18										ND	ng/L
	ACE	02338000	USA	-86.6455	32.7735	2011-11-2										ND	ng/L
	ACE	02338000	USA	-86.6455	32.7735	2011-11-17										ND	ng/L
	ACE	02338000	USA	-86.6455	32.7735	2011-12-5										ND	ng/L
	ACE	02338000	USA	-86.6455	32.7735	2012-1-5										ND	ng/L
	ACE	02338000	USA	-86.6455	32.7735	2012-1-19										ND	ng/L
	ACE	02338000	USA	-86.6455	32.7735	2012-2-2										ND	ng/L
	ACE	02338000	USA	-86.6455	32.7735	2012-3-6										ND	ng/L
	ACE	02338000	USA	-86.6455	32.7735	2012-3-22										ND	ng/L
	ACE	02338000	USA	-86.6455	32.7735	2012-4-9										ND	ng/L
	ACE	02338000	USA	-86.6455	32.7735	2012-5-8										ND	ng/L
	ACE	02338000	USA	-86.6455	32.7735	2012-5-29										ND	ng/L
	ACE	02338000	USA	-86.6455	32.7735	2012-6-21										6.7	ng/L
	ACE	02338000	USA	-86.6455	32.7735	2012-7-10										45.6	ng/L
	ACE	02338000	USA	-86.6455	32.7735	202-7-25										2.9	ng/L
	ACE	02338000	USA	-86.6455	32.7735	2012-8-9										2.5	ng/L
	ACE	02338000	USA	-86.6455	32.7735	2012-9-6										ND	ng/L
	ACE	02338000	USA	-86.6455	32.7735	2012-9-20										ND	ng/L
	IMI	02335870	USA	-84.5289	33.897	2011-10-4										ND	ng/L
	IMI	02335870	USA	-84.5289	33.897	2011-10-18										ND	ng/L
	IMI	02335870	USA	-84.5289	33.897	2011-11-2										ND	ng/L
	IMI	02335870	USA	-84.5289	33.897	2011-11-17										ND	ng/L
	IMI	02335870	USA	-84.5289	33.897	2011-12-5										ND	ng/L
	IMI	02335870	USA	-84.5289	33.897	2011-12-22										ND	ng/L
	IMI	02335870	USA	-84.5289	33.897	2012-1-5										ND	ng/L
	IMI	02335870	USA	-84.5289	33.897	2012-1-19										ND	ng/L
	IMI	02335870	USA	-84.5289	33.897	2012-2-2										ND	ng/L
	IMI	02335870	USA	-84.5289	33.897	2012-2-14										ND	ng/L
	IMI	02335870	USA	-84.5289	33.897	2012-3-6										ND	ng/L
	IMI	02335870	USA	-84.5289	33.897	2012-3-22										ND	ng/L
	IMI	02335870	USA	-84.5289	33.897	2012-4-9										ND	ng/L
	IMI	02335870	USA	-84.5289	33.897	2012-4-24										ND	ng/L
	IMI	02335870	USA	-84.5289	33.897	2012-5-8										ND	ng/L
	IMI	02335870	USA	-84.5289	33.897	2012-5--29										ND	ng/L
	IMI	02335870	USA	-84.5289	33.897	2012-6-14										ND	ng/L
	IMI	02335870	USA	-84.5289	33.897	2012-6-27										ND	ng/L
	IMI	02335870	USA	-84.5289	33.897	2012-7-10										ND	ng/L
	IMI	02335870	USA	-84.5289	33.897	2012-7-25										ND	ng/L
	IMI	02335870	USA	-84.5289	33.897	2012-8-9										ND	ng/L
	IMI	02335870	USA	-84.5289	33.897	2012-8-23										ND	ng/L
	IMI	02335870	USA	-84.5289	33.897	2012-9-6										4.1	ng/L
	IMI	02335870	USA	-84.5289	33.897	2012-9-20										ND	ng/L
	IMI	02335870	USA	-84.5289	33.897	2012-10-11										ND	ng/L
	IMI	02335870	USA	-84.5289	33.897	2012-10-25										ND	ng/L
	IMI	02335870	USA	-84.5289	33.897	2012-11-5										ND	ng/L
	IMI	02335870	USA	-84.5289	33.897	2012-11-19										ND	ng/L
	IMI	02335870	USA	-84.5289	33.897	2012-12-5										ND	ng/L
	IMI	02335870	USA	-84.5289	33.897	2012-12-18										ND	ng/L
	IMI	02335870	USA	-84.5289	33.897	2013-1-8										ND	ng/L
	IMI	02335870	USA	-84.5289	33.897	2013-1-22										ND	ng/L
	IMI	02335870	USA	-84.5289	33.897	2013-2-5										ND	ng/L
	IMI	02335870	USA	-84.5289	33.897	2013-2-19										ND	ng/L
	IMI	02335870	USA	-84.5289	33.897	2013-3-7										ND	ng/L
	IMI	02335870	USA	-84.5289	33.897	2013-3-21										ND	ng/L
	IMI	02335870	USA	-84.5289	33.897	2013-4-1										ND	ng/L
	IMI	02335870	USA	-84.5289	33.897	2013-4-16										ND	ng/L
	IMI	02335870	USA	-84.5289	33.897	2013-5-7										ND	ng/L
	IMI	02335870	USA	-84.5289	33.897	2013-5-23										ND	ng/L
	IMI	02335870	USA	-84.5289	33.897	2013-6-5										ND	ng/L
	IMI	02335870	USA	-84.5289	33.897	2013-6-27										ND	ng/L
	IMI	02335870	USA	-84.5289	33.897	2013-7-11										ND	ng/L
	IMI	02335870	USA	-84.5289	33.897	2013-7-22										ND	ng/L
	IMI	02335870	USA	-84.5289	33.897	2013-8-7										ND	ng/L
	IMI	02335870	USA	-84.5289	33.897	2013-8-26										ND	ng/L
	IMI	02335870	USA	-84.5289	33.897	2013-9-10										ND	ng/L
	IMI	02335870	USA	-84.5289	33.897	2013-9-13										ND	ng/L
	IMI	02338000	USA	-86.6455	32.7735	2011-9-9										ND	ng/L
	IMI	02338000	USA	-86.6455	32.7735	2011-10-18										ND	ng/L
	IMI	02338000	USA	-86.6455	32.7735	2011-11-2										ND	ng/L
	IMI	02338000	USA	-86.6455	32.7735	2011-11-17										ND	ng/L
	IMI	02338000	USA	-86.6455	32.7735	2011-12-5										ND	ng/L
	IMI	02338000	USA	-86.6455	32.7735	2012-1-5										ND	ng/L
	IMI	02338000	USA	-86.6455	32.7735	2012-1-19										ND	ng/L
	IMI	02338000	USA	-86.6455	32.7735	2012-2-2										ND	ng/L
	IMI	02338000	USA	-86.6455	32.7735	2012-3-6										ND	ng/L
	IMI	02338000	USA	-86.6455	32.7735	2012-3-22										ND	ng/L
	IMI	02338000	USA	-86.6455	32.7735	2012-4-9										1.6	ng/L
	IMI	02338000	USA	-86.6455	32.7735	2012-5-8										3	ng/L
	IMI	02338000	USA	-86.6455	32.7735	2012-5-29										ND	ng/L
	IMI	02338000	USA	-86.6455	32.7735	2012-6-21										3.2	ng/L
	IMI	02338000	USA	-86.6455	32.7735	2012-7-10										ND	ng/L
	IMI	02338000	USA	-86.6455	32.7735	202-7-25										3.5	ng/L
	IMI	02338000	USA	-86.6455	32.7735	2012-8-9										2.5	ng/L
	IMI	02338000	USA	-86.6455	32.7735	2012-9-6										ND	ng/L
	IMI	02338000	USA	-86.6455	32.7735	2012-9-20										3.1	ng/L
	TXM	02335870	USA	-84.5289	33.897	2011-10-4										17.5	ng/L
	TXM	02335870	USA	-84.5289	33.897	2011-10-18										ND	ng/L
	TXM	02335870	USA	-84.5289	33.897	2011-11-2										ND	ng/L
	TXM	02335870	USA	-84.5289	33.897	2011-11-17										8.5	ng/L
	TXM	02335870	USA	-84.5289	33.897	2011-12-5										6.8	ng/L
	TXM	02335870	USA	-84.5289	33.897	2011-12-22										10.4	ng/L
	TXM	02335870	USA	-84.5289	33.897	2012-1-5										8.8	ng/L
	TXM	02335870	USA	-84.5289	33.897	2012-1-19										35.3	ng/L
	TXM	02335870	USA	-84.5289	33.897	2012-2-2										11	ng/L
	TXM	02335870	USA	-84.5289	33.897	2012-2-14										4.5	ng/L
	TXM	02335870	USA	-84.5289	33.897	2012-3-6										8.6	ng/L
	TXM	02335870	USA	-84.5289	33.897	2012-3-22										7	ng/L
	TXM	02335870	USA	-84.5289	33.897	2012-4-9										6.4	ng/L
	TXM	02335870	USA	-84.5289	33.897	2012-4-24										7.2	ng/L
	TXM	02335870	USA	-84.5289	33.897	2012-5-8										30.2	ng/L
	TXM	02335870	USA	-84.5289	33.897	2012-5--29										6	ng/L
	TXM	02335870	USA	-84.5289	33.897	2012-6-14										18.8	ng/L
	TXM	02335870	USA	-84.5289	33.897	2012-6-27										28	ng/L
	TXM	02335870	USA	-84.5289	33.897	2012-7-10										65.9	ng/L
	TXM	02335870	USA	-84.5289	33.897	2012-7-25										10.9	ng/L
	TXM	02335870	USA	-84.5289	33.897	2012-8-9										14.8	ng/L
	TXM	02335870	USA	-84.5289	33.897	2012-8-23										4	ng/L
	TXM	02335870	USA	-84.5289	33.897	2012-9-6										14.7	ng/L
	TXM	02335870	USA	-84.5289	33.897	2012-9-20										7.7	ng/L
	TXM	02335870	USA	-84.5289	33.897	2012-10-11										5.5	ng/L
	TXM	02335870	USA	-84.5289	33.897	2012-10-25										5.3	ng/L
	TXM	02335870	USA	-84.5289	33.897	2012-11-5										ND	ng/L
	TXM	02335870	USA	-84.5289	33.897	2012-11-19										ND	ng/L
	TXM	02335870	USA	-84.5289	33.897	2012-12-5										ND	ng/L
	TXM	02335870	USA	-84.5289	33.897	2012-12-18										2.6	ng/L
	TXM	02335870	USA	-84.5289	33.897	2013-1-8										3	ng/L
	TXM	02335870	USA	-84.5289	33.897	2013-1-22										1.2	ng/L
	TXM	02335870	USA	-84.5289	33.897	2013-2-5										2.7	ng/L
	TXM	02335870	USA	-84.5289	33.897	2013-2-19										4.8	ng/L
	TXM	02335870	USA	-84.5289	33.897	2013-3-7										10.6	ng/L
	TXM	02335870	USA	-84.5289	33.897	2013-3-21										5.5	ng/L
	TXM	02335870	USA	-84.5289	33.897	2013-4-1										5.7	ng/L
	TXM	02335870	USA	-84.5289	33.897	2013-4-16										8	ng/L
	TXM	02335870	USA	-84.5289	33.897	2013-5-7										12.5	ng/L
	TXM	02335870	USA	-84.5289	33.897	2013-5-23										14.1	ng/L
	TXM	02335870	USA	-84.5289	33.897	2013-6-5										10.6	ng/L
	TXM	02335870	USA	-84.5289	33.897	2013-6-27										14.6	ng/L
	TXM	02335870	USA	-84.5289	33.897	2013-7-11										8.4	ng/L
	TXM	02335870	USA	-84.5289	33.897	2013-7-22										9.6	ng/L
	TXM	02335870	USA	-84.5289	33.897	2013-8-7										10.7	ng/L
	TXM	02335870	USA	-84.5289	33.897	2013-8-26										9.8	ng/L
	TXM	02335870	USA	-84.5289	33.897	2013-9-10										10.5	ng/L
	TXM	02335870	USA	-84.5289	33.897	2013-9-13										15.1	ng/L
	TXM	02338000	USA	-86.6455	32.7735	2011-9-9										33.7	ng/L
	TXM	02338000	USA	-86.6455	32.7735	2011-10-18										ND	ng/L
	TXM	02338000	USA	-86.6455	32.7735	2011-11-2										ND	ng/L
	TXM	02338000	USA	-86.6455	32.7735	2011-11-17										ND	ng/L
	TXM	02338000	USA	-86.6455	32.7735	2011-12-5										ND	ng/L
	TXM	02338000	USA	-86.6455	32.7735	2012-1-5										7.9	ng/L
	TXM	02338000	USA	-86.6455	32.7735	2012-1-19										6.1	ng/L
	TXM	02338000	USA	-86.6455	32.7735	2012-2-2										4.3	ng/L
	TXM	02338000	USA	-86.6455	32.7735	2012-3-6										3.4	ng/L
	TXM	02338000	USA	-86.6455	32.7735	2012-3-22										7.5	ng/L
	TXM	02338000	USA	-86.6455	32.7735	2012-4-9										10.1	ng/L
	TXM	02338000	USA	-86.6455	32.7735	2012-5-8										10.9	ng/L
	TXM	02338000	USA	-86.6455	32.7735	2012-5-29										5.9	ng/L
	TXM	02338000	USA	-86.6455	32.7735	2012-6-21										11.1	ng/L
	TXM	02338000	USA	-86.6455	32.7735	2012-7-10										51	ng/L
	TXM	02338000	USA	-86.6455	32.7735	202-7-25										12	ng/L
	TXM	02338000	USA	-86.6455	32.7735	2012-8-9										12.1	ng/L
	TXM	02338000	USA	-86.6455	32.7735	2012-9-6										8.8	ng/L
	TXM	02338000	USA	-86.6455	32.7735	2012-9-20										10.2	ng/L
	CLO	01619500	USA	-77.8173	39.5616	2014-4-15										ND	ng/L
	CLO	01619500	USA	-77.8173	39.5616	2014-4-25										3	ng/L
	CLO	01619500	USA	-77.8173	39.5616	2014-4-30										2.6	ng/L
	CLO	01619500	USA	-77.8173	39.5616	2014-5-12										ND	ng/L
	CLO	01619500	USA	-77.8173	39.5616	2014-5-16										4	ng/L
	CLO	01619500	USA	-77.8173	39.5616	2014-5-30										ND	ng/L
	CLO	01639500	USA	-77.8173	39.5616	2014-4-4										4.8	ng/L
	CLO	01639500	USA	-77.8173	39.5616	2014-4-14										ND	ng/L
	CLO	01639500	USA	-77.8173	39.5616	2014-4-15										ND	ng/L
	CLO	01639500	USA	-77.8173	39.5616	2014-4-25										ND	ng/L
	CLO	01639500	USA	-77.8173	39.5616	2014-4-30										10	ng/L
	CLO	01639500	USA	-77.8173	39.5616	2014-5-12										ND	ng/L
	CLO	01639500	USA	-77.8173	39.5616	2014-5-16										62	ng/L
	CLO	01639500	USA	-77.8173	39.5616	2014-5-30										20.7	ng/L
	CLO	01553860	USA	-76.8156	40.9684	2014-4-26										3.3	ng/L
	CLO	01553860	USA	-76.8156	40.9684	2014-5-9										ND	ng/L
	CLO	01553860	USA	-76.8156	40.9684	2014-5-16										28.4	ng/L
	CLO	01553860	USA	-76.8156	40.9684	2014-5-28										8.3	ng/L
	IMI	01619500	USA	-77.8173	39.5616	2014-4-15										ND	ng/L
	IMI	01619500	USA	-77.8173	39.5616	2014-4-25										ND	ng/L
	IMI	01619500	USA	-77.8173	39.5616	2014-4-30										ND	ng/L
	IMI	01619500	USA	-77.8173	39.5616	2014-5-12										ND	ng/L
	IMI	01619500	USA	-77.8173	39.5616	2014-5-16										ND	ng/L
	IMI	01619500	USA	-77.8173	39.5616	2014-5-30										ND	ng/L
	IMI	01639500	USA	-77.8173	39.5616	2014-4-4										ND	ng/L
	IMI	01639500	USA	-77.8173	39.5616	2014-4-14										ND	ng/L
	IMI	01639500	USA	-77.8173	39.5616	2014-4-15										ND	ng/L
	IMI	01639500	USA	-77.8173	39.5616	2014-4-25										ND	ng/L
	IMI	01639500	USA	-77.8173	39.5616	2014-4-30										ND	ng/L
	IMI	01639500	USA	-77.8173	39.5616	2014-5-12										ND	ng/L
	IMI	01639500	USA	-77.8173	39.5616	2014-5-16										ND	ng/L
	IMI	01639500	USA	-77.8173	39.5616	2014-5-30										ND	ng/L
	IMI	01553860	USA	-76.8156	40.9684	2014-4-26										ND	ng/L
	IMI	01553860	USA	-76.8156	40.9684	2014-5-9										ND	ng/L
	IMI	01553860	USA	-76.8156	40.9684	2014-5-16										52	ng/L
	IMI	01553860	USA	-76.8156	40.9684	2014-5-28										ND	ng/L
	TXM	01619500	USA	-77.8173	39.5616	2014-4-15										ND	ng/L
	TXM	01619500	USA	-77.8173	39.5616	2014-4-25										ND	ng/L
	TXM	01619500	USA	-77.8173	39.5616	2014-4-30										ND	ng/L
	TXM	01619500	USA	-77.8173	39.5616	2014-5-12										ND	ng/L
	TXM	01619500	USA	-77.8173	39.5616	2014-5-16										6.9	ng/L
	TXM	01619500	USA	-77.8173	39.5616	2014-5-30										ND	ng/L
	TXM	01639500	USA	-77.8173	39.5616	2014-4-4										ND	ng/L
	TXM	01639500	USA	-77.8173	39.5616	2014-4-14										ND	ng/L
	TXM	01639500	USA	-77.8173	39.5616	2014-4-15										ND	ng/L
	TXM	01639500	USA	-77.8173	39.5616	2014-4-25										ND	ng/L
	TXM	01639500	USA	-77.8173	39.5616	2014-4-30										6.1	ng/L
	TXM	01639500	USA	-77.8173	39.5616	2014-5-12										ND	ng/L
	TXM	01639500	USA	-77.8173	39.5616	2014-5-16										31.1	ng/L
	TXM	01639500	USA	-77.8173	39.5616	2014-5-30										12	ng/L
	TXM	01553860	USA	-76.8156	40.9684	2014-4-26										ND	ng/L
	TXM	01553860	USA	-76.8156	40.9684	2014-5-9										ND	ng/L
	TXM	01553860	USA	-76.8156	40.9684	2014-5-16										35.9	ng/L
	TXM	01553860	USA	-76.8156	40.9684	2014-5-28										ND	ng/L
	CLO	05485598	USA	-80.0641	42.118	2012-12-5										5.8	ng/L
	CLO	05485600	USA	-80.0641	42.118	2012-12-5										5.3	ng/L
	CLO	548560290	USA	-80.0641	42.118	2012-12-5										6.9	ng/L
	CLO	05485603	USA	-80.0641	42.118	2012-12-5										5.5	ng/L
	CLO	05485604	USA	-80.0641	42.118	2012-12-5										2.1	ng/L
	CLO	0548560402	USA	-80.0641	42.118	2012-12-5										1.7	ng/L
	CLO	05485605	USA	-80.0641	42.118	2012-12-5										1.8	ng/L
	CLO	05485608	USA	-80.0641	42.118	2012-12-6										2.7	ng/L
	CLO	05485598	USA	-80.0641	42.118	2013-6-20										15.2	ng/L
	CLO	05485600	USA	-80.0641	42.118	2013-6-20										14.6	ng/L
	CLO	548560290	USA	-80.0641	42.118	2013-6-20										13.7	ng/L
	CLO	05485603	USA	-80.0641	42.118	2013-6-20										12	ng/L
	CLO	05485604	USA	-80.0641	42.118	2013-6-20										3.6	ng/L
	CLO	0548560402	USA	-80.0641	42.118	2013-6-20										13.1	ng/L
	CLO	05485605	USA	-80.0641	42.118	2013-6-20										13.8	ng/L
	CLO	05485608	USA	-80.0641	42.118	2013-6-20										13.3	ng/L
	IMI	05485598	USA	-80.0641	42.118	2012-12-5										2.5	ng/L
	IMI	05485600	USA	-80.0641	42.118	2012-12-5										2.6	ng/L
	IMI	548560290	USA	-80.0641	42.118	2012-12-5										3.2	ng/L
	IMI	05485603	USA	-80.0641	42.118	2012-12-5										2.2	ng/L
	IMI	05485604	USA	-80.0641	42.118	2012-12-5										12	ng/L
	IMI	0548560402	USA	-80.0641	42.118	2012-12-5										7.8	ng/L
	IMI	05485605	USA	-80.0641	42.118	2012-12-5										7.1	ng/L
	IMI	05485608	USA	-80.0641	42.118	2012-12-6										7.9	ng/L
	IMI	05485598	USA	-80.0641	42.118	2013-6-20										2.5	ng/L
	IMI	05485600	USA	-80.0641	42.118	2013-6-20										2.5	ng/L
	IMI	548560290	USA	-80.0641	42.118	2013-6-20										2.5	ng/L
	IMI	05485603	USA	-80.0641	42.118	2013-6-20										2.1	ng/L
	IMI	05485604	USA	-80.0641	42.118	2013-6-20										6.9	ng/L
	IMI	0548560402	USA	-80.0641	42.118	2013-6-20										2.7	ng/L
	IMI	05485605	USA	-80.0641	42.118	2013-6-20										5.3	ng/L
	IMI	05485608	USA	-80.0641	42.118	2013-6-20										5.2	ng/L
	TXM	05485598	USA	-80.0641	42.118	2012-12-5										ND	ng/L
	TXM	05485600	USA	-80.0641	42.118	2012-12-5										ND	ng/L
	TXM	548560290	USA	-80.0641	42.118	2012-12-5										ND	ng/L
	TXM	05485603	USA	-80.0641	42.118	2012-12-5										ND	ng/L
	TXM	05485604	USA	-80.0641	42.118	2012-12-5										ND	ng/L
	TXM	0548560402	USA	-80.0641	42.118	2012-12-5										ND	ng/L
	TXM	05485605	USA	-80.0641	42.118	2012-12-5										ND	ng/L
	TXM	05485608	USA	-80.0641	42.118	2012-12-6										ND	ng/L
	TXM	05485598	USA	-80.0641	42.118	2013-6-20										6.9	ng/L
	TXM	05485600	USA	-80.0641	42.118	2013-6-20										6.5	ng/L
	TXM	548560290	USA	-80.0641	42.118	2013-6-20										5.9	ng/L
	TXM	05485603	USA	-80.0641	42.118	2013-6-20										5.6	ng/L
	TXM	05485604	USA	-80.0641	42.118	2013-6-20										ND	ng/L
	TXM	0548560402	USA	-80.0641	42.118	2013-6-20										6	ng/L
	TXM	05485605	USA	-80.0641	42.118	2013-6-20										5.9	ng/L
	TXM	05485608	USA	-80.0641	42.118	2013-6-20										5.9	ng/L
Inputs,source apportionment,and transboundary transport of pesticides and other polar organic contaminants along the lower Red River, Manitoba,Canada	TXM	Emerson (EM)	CAN	-97.2153	49.0084	2014-5-28(13d)										1.9	ng/L
	TXM	Emerson (EM)	CAN	-97.2153	49.0084	2014-6-10(28d)(42d)										-	ng/L
	TXM	Emerson (EM)	CAN	-97.2153	49.0084	2014-7-8(14d)(59d)										7.3	ng/L
	TXM	Emerson (EM)	CAN	-97.2153	49.0084	2014-7-22(7d)										14.3	ng/L
	TXM	Emerson (EM)	CAN	-97.2153	49.0084	2014-7-29(14d)										9.7	ng/L
	TXM	Emerson (EM)	CAN	-97.2153	49.0084	2014-8-12(14d)										3.7	ng/L
	TXM	Emerson (EM)	CAN	-97.2153	49.0084	2014-8-26(14d)										2.5	ng/L
	TXM	Emerson (EM)	CAN	-97.2153	49.0084	2014-9-9(14d)										2.5	ng/L
	TXM	Emerson (EM)	CAN	-97.2153	49.0084	2014-9-23(14d)										0.59	ng/L
	TXM	Emerson (EM)	CAN	-97.2153	49.0084	2014-10-7(14d)										0.39	ng/L
	TXM	Emerson (EM)	CAN	-97.2153	49.0084	2014-10-21(7d)										0.51	ng/L
	TXM	Emerson (EM)	CAN	-97.2153	49.0084	2015-4-29(14d)										ND	ng/L
	TXM	Emerson (EM)	CAN	-97.2153	49.0084	2015-5-13(14d)										16.4	ng/L
	TXM	Emerson (EM)	CAN	-97.2153	49.0084	2015-5-27(13d)										6	ng/L
	TXM	Emerson (EM)	CAN	-97.2153	49.0084	2015-6-9(14d)										5.4	ng/L
	TXM	Emerson (EM)	CAN	-97.2153	49.0084	2015-6-23(14d)										4	ng/L
	TXM	Emerson (EM)	CAN	-97.2153	49.0084	2015-7-7(14d)										5.4	ng/L
	TXM	Emerson (EM)	CAN	-97.2153	49.0084	2015-7-21(14d)										6.3	ng/L
	TXM	Emerson (EM)	CAN	-97.2153	49.0084	2015-8-4(14d)										1.6	ng/L
	TXM	Emerson (EM)	CAN	-97.2153	49.0084	2015-8-18(15d)										3	ng/L
	TXM	Emerson (EM)	CAN	-97.2153	49.0084	2015-9-2(14d)										2.6	ng/L
	TXM	Emerson (EM)	CAN	-97.2153	49.0084	2015-9-16(21d)										0.73	ng/L
	TXM	Emerson (EM)	CAN	-97.2153	49.0084	2015-10-7(21d)										0.21	ng/L
	TXM	St.Norbert(NB)	CAN	-97.1377	49.7547	2014-5-28(13d)										-	ng/L
	TXM	St.Norbert(NB)	CAN	-97.1377	49.7547	2014-6-10(28d)(42d)										15.7	ng/L
	TXM	St.Norbert(NB)	CAN	-97.1377	49.7547	2014-7-8(14d)(59d)										26.9	ng/L
	TXM	St.Norbert(NB)	CAN	-97.1377	49.7547	2014-7-22(7d)										6.1	ng/L
	TXM	St.Norbert(NB)	CAN	-97.1377	49.7547	2014-7-29(14d)										3.2	ng/L
	TXM	St.Norbert(NB)	CAN	-97.1377	49.7547	2014-8-12(14d)										2	ng/L
	TXM	St.Norbert(NB)	CAN	-97.1377	49.7547	2014-8-26(14d)										3.4	ng/L
	TXM	St.Norbert(NB)	CAN	-97.1377	49.7547	2014-9-9(14d)										1.5	ng/L
	TXM	St.Norbert(NB)	CAN	-97.1377	49.7547	2014-9-23(14d)										0.58	ng/L
	TXM	St.Norbert(NB)	CAN	-97.1377	49.7547	2014-10-7(14d)										0.49	ng/L
	TXM	St.Norbert(NB)	CAN	-97.1377	49.7547	2014-10-21(7d)										0.29	ng/L
	TXM	St.Norbert(NB)	CAN	-97.1377	49.7547	2015-4-29(14d)										4.2	ng/L
	TXM	St.Norbert(NB)	CAN	-97.1377	49.7547	2015-5-13(14d)										7.8	ng/L
	TXM	St.Norbert(NB)	CAN	-97.1377	49.7547	2015-5-27(13d)										6.3	ng/L
	TXM	St.Norbert(NB)	CAN	-97.1377	49.7547	2015-6-9(14d)										6.1	ng/L
	TXM	St.Norbert(NB)	CAN	-97.1377	49.7547	2015-6-23(14d)										2.1	ng/L
	TXM	St.Norbert(NB)	CAN	-97.1377	49.7547	2015-7-7(14d)										2.5	ng/L
	TXM	St.Norbert(NB)	CAN	-97.1377	49.7547	2015-7-21(14d)										5.8	ng/L
	TXM	St.Norbert(NB)	CAN	-97.1377	49.7547	2015-8-4(14d)										1.9	ng/L
	TXM	St.Norbert(NB)	CAN	-97.1377	49.7547	2015-8-18(15d)										1.4	ng/L
	TXM	St.Norbert(NB)	CAN	-97.1377	49.7547	2015-9-2(14d)										3	ng/L
	TXM	St.Norbert(NB)	CAN	-97.1377	49.7547	2015-9-16(21d)										1.9	ng/L
	TXM	St.Norbert(NB)	CAN	-97.1377	49.7547	2015-10-7(21d)										0.33	ng/L
	TXM	North End(NE)	CAN	-97.0975	49.9515	2014-5-28(13d)										2	ng/L
	TXM	North End(NE)	CAN	-97.0975	49.9515	2014-6-10(28d)(42d)										-	ng/L
	TXM	North End(NE)	CAN	-97.0975	49.9515	2014-7-8(14d)(59d)										23.5	ng/L
	TXM	North End(NE)	CAN	-97.0975	49.9515	2014-7-22(7d)										15.6	ng/L
	TXM	North End(NE)	CAN	-97.0975	49.9515	2014-7-29(14d)										7.4	ng/L
	TXM	North End(NE)	CAN	-97.0975	49.9515	2014-8-12(14d)										5.1	ng/L
	TXM	North End(NE)	CAN	-97.0975	49.9515	2014-8-26(14d)										1.7	ng/L
	TXM	North End(NE)	CAN	-97.0975	49.9515	2014-9-9(14d)										2.9	ng/L
	TXM	North End(NE)	CAN	-97.0975	49.9515	2014-9-23(14d)										2.2	ng/L
	TXM	North End(NE)	CAN	-97.0975	49.9515	2014-10-7(14d)										0.4	ng/L
	TXM	North End(NE)	CAN	-97.0975	49.9515	2014-10-21(7d)										0.89	ng/L
	TXM	North End(NE)	CAN	-97.0975	49.9515	2015-4-29(14d)										2	ng/L
	TXM	North End(NE)	CAN	-97.0975	49.9515	2015-5-13(14d)										1	ng/L
	TXM	North End(NE)	CAN	-97.0975	49.9515	2015-5-27(13d)										2.8	ng/L
	TXM	North End(NE)	CAN	-97.0975	49.9515	2015-6-9(14d)										2.8	ng/L
	TXM	North End(NE)	CAN	-97.0975	49.9515	2015-6-23(14d)										2.1	ng/L
	TXM	North End(NE)	CAN	-97.0975	49.9515	2015-7-7(14d)										1.5	ng/L
	TXM	North End(NE)	CAN	-97.0975	49.9515	2015-7-21(14d)										1.6	ng/L
	TXM	North End(NE)	CAN	-97.0975	49.9515	2015-8-4(14d)										5.5	ng/L
	TXM	North End(NE)	CAN	-97.0975	49.9515	2015-8-18(15d)										2.5	ng/L
	TXM	North End(NE)	CAN	-97.0975	49.9515	2015-9-2(14d)										3.6	ng/L
	TXM	North End(NE)	CAN	-97.0975	49.9515	2015-9-16(21d)										21.9	ng/L
	TXM	North End(NE)	CAN	-97.0975	49.9515	2015-10-7(21d)										0.58	ng/L
	TXM	Selkirk(SK)	CAN	-96.8648	50.1427	2014-5-28(13d)										-	ng/L
	TXM	Selkirk(SK)	CAN	-96.8648	50.1427	2014-6-10(28d)(42d)										20.8	ng/L
	TXM	Selkirk(SK)	CAN	-96.8648	50.1427	2014-7-8(14d)(59d)										24.8	ng/L
	TXM	Selkirk(SK)	CAN	-96.8648	50.1427	2014-7-22(7d)										19.6	ng/L
	TXM	Selkirk(SK)	CAN	-96.8648	50.1427	2014-7-29(14d)										8.1	ng/L
	TXM	Selkirk(SK)	CAN	-96.8648	50.1427	2014-8-12(14d)										5.4	ng/L
	TXM	Selkirk(SK)	CAN	-96.8648	50.1427	2014-8-26(14d)										4.9	ng/L
	TXM	Selkirk(SK)	CAN	-96.8648	50.1427	2014-9-9(14d)										5.5	ng/L
	TXM	Selkirk(SK)	CAN	-96.8648	50.1427	2014-9-23(14d)										2.9	ng/L
	TXM	Selkirk(SK)	CAN	-96.8648	50.1427	2014-10-7(14d)										0.48	ng/L
	TXM	Selkirk(SK)	CAN	-96.8648	50.1427	2014-10-21(7d)										1.5	ng/L
	TXM	Selkirk(SK)	CAN	-96.8648	50.1427	2015-4-29(14d)										2.7	ng/L
	TXM	Selkirk(SK)	CAN	-96.8648	50.1427	2015-5-13(14d)										1.6	ng/L
	TXM	Selkirk(SK)	CAN	-96.8648	50.1427	2015-5-27(13d)										6.6	ng/L
	TXM	Selkirk(SK)	CAN	-96.8648	50.1427	2015-6-9(14d)										5.7	ng/L
	TXM	Selkirk(SK)	CAN	-96.8648	50.1427	2015-6-23(14d)										3.8	ng/L
	TXM	Selkirk(SK)	CAN	-96.8648	50.1427	2015-7-7(14d)										3.8	ng/L
	TXM	Selkirk(SK)	CAN	-96.8648	50.1427	2015-7-21(14d)										7.7	ng/L
	TXM	Selkirk(SK)	CAN	-96.8648	50.1427	2015-8-4(14d)										4.6	ng/L
	TXM	Selkirk(SK)	CAN	-96.8648	50.1427	2015-8-18(15d)										5.1	ng/L
	TXM	Selkirk(SK)	CAN	-96.8648	50.1427	2015-9-2(14d)										5.8	ng/L
	TXM	Selkirk(SK)	CAN	-96.8648	50.1427	2015-9-16(21d)										-	ng/L
	TXM	Selkirk(SK)	CAN	-96.8648	50.1427	2015-10-7(21d)										-	ng/L
	TXM	Breezy Point(BP)	CAN	-96.8516	50.2783	2014-5-28(13d)										-	ng/L
	TXM	Breezy Point(BP)	CAN	-96.8516	50.2783	2014-6-10(28d)(42d)										-	ng/L
	TXM	Breezy Point(BP)	CAN	-96.8516	50.2783	2014-7-8(14d)(59d)										23.3	ng/L
	TXM	Breezy Point(BP)	CAN	-96.8516	50.2783	2014-7-22(7d)										9.7	ng/L
	TXM	Breezy Point(BP)	CAN	-96.8516	50.2783	2014-7-29(14d)										4.3	ng/L
	TXM	Breezy Point(BP)	CAN	-96.8516	50.2783	2014-8-12(14d)										3	ng/L
	TXM	Breezy Point(BP)	CAN	-96.8516	50.2783	2014-8-26(14d)										2.7	ng/L
	TXM	Breezy Point(BP)	CAN	-96.8516	50.2783	2014-9-9(14d)										2.8	ng/L
	TXM	Breezy Point(BP)	CAN	-96.8516	50.2783	2014-9-23(14d)										2.6	ng/L
	TXM	Breezy Point(BP)	CAN	-96.8516	50.2783	2014-10-7(14d)										0.54	ng/L
	TXM	Breezy Point(BP)	CAN	-96.8516	50.2783	2014-10-21(7d)										-	ng/L
	TXM	Breezy Point(BP)	CAN	-96.8516	50.2783	2015-4-29(14d)										-	ng/L
	TXM	Breezy Point(BP)	CAN	-96.8516	50.2783	2015-5-13(14d)										6.1	ng/L
	TXM	Breezy Point(BP)	CAN	-96.8516	50.2783	2015-5-27(13d)										7	ng/L
	TXM	Breezy Point(BP)	CAN	-96.8516	50.2783	2015-6-9(14d)										14.1	ng/L
	TXM	Breezy Point(BP)	CAN	-96.8516	50.2783	2015-6-23(14d)										4.2	ng/L
	TXM	Breezy Point(BP)	CAN	-96.8516	50.2783	2015-7-7(14d)										6.1	ng/L
	TXM	Breezy Point(BP)	CAN	-96.8516	50.2783	2015-7-21(14d)										6.5	ng/L
	TXM	Breezy Point(BP)	CAN	-96.8516	50.2783	2015-8-4(14d)										6.5	ng/L
	TXM	Breezy Point(BP)	CAN	-96.8516	50.2783	2015-8-18(15d)										4.8	ng/L
	TXM	Breezy Point(BP)	CAN	-96.8516	50.2783	2015-9-2(14d)										6.2	ng/L
	TXM	Breezy Point(BP)	CAN	-96.8516	50.2783	2015-9-16(21d)										7.3	ng/L
	TXM	Breezy Point(BP)	CAN	-96.8516	50.2783	2015-10-7(21d)										0.67	ng/L
	TXM	Headingley(HD)	CAN	-97.4098	49.8689	2014-5-28(13d)										-	ng/L
	TXM	Headingley(HD)	CAN	-97.4098	49.8689	2014-6-10(28d)(42d)										1.9	ng/L
	TXM	Headingley(HD)	CAN	-97.4098	49.8689	2014-7-8(14d)(59d)										28.9	ng/L
	TXM	Headingley(HD)	CAN	-97.4098	49.8689	2014-7-22(7d)										11.6	ng/L
	TXM	Headingley(HD)	CAN	-97.4098	49.8689	2014-7-29(14d)										10.5	ng/L
	TXM	Headingley(HD)	CAN	-97.4098	49.8689	2014-8-12(14d)										4.9	ng/L
	TXM	Headingley(HD)	CAN	-97.4098	49.8689	2014-8-26(14d)										4.4	ng/L
	TXM	Headingley(HD)	CAN	-97.4098	49.8689	2014-9-9(14d)										4.5	ng/L
	TXM	Headingley(HD)	CAN	-97.4098	49.8689	2014-9-23(14d)										0.8	ng/L
	TXM	Headingley(HD)	CAN	-97.4098	49.8689	2014-10-7(14d)										0.8	ng/L
	TXM	Headingley(HD)	CAN	-97.4098	49.8689	2014-10-21(7d)										2.2	ng/L
	TXM	Headingley(HD)	CAN	-97.4098	49.8689	2015-4-29(14d)										1.5	ng/L
	TXM	Headingley(HD)	CAN	-97.4098	49.8689	2015-5-13(14d)										2.7	ng/L
	TXM	Headingley(HD)	CAN	-97.4098	49.8689	2015-5-27(13d)										2.8	ng/L
	TXM	Headingley(HD)	CAN	-97.4098	49.8689	2015-6-9(14d)										2	ng/L
	TXM	Headingley(HD)	CAN	-97.4098	49.8689	2015-6-23(14d)										3.7	ng/L
	TXM	Headingley(HD)	CAN	-97.4098	49.8689	2015-7-7(14d)										0.7	ng/L
	TXM	Headingley(HD)	CAN	-97.4098	49.8689	2015-7-21(14d)										0.8	ng/L
	TXM	Headingley(HD)	CAN	-97.4098	49.8689	2015-8-4(14d)										6.7	ng/L
	TXM	Headingley(HD)	CAN	-97.4098	49.8689	2015-8-18(15d)										2	ng/L
	TXM	Headingley(HD)	CAN	-97.4098	49.8689	2015-9-2(14d)										2.1	ng/L
	TXM	Headingley(HD)	CAN	-97.4098	49.8689	2015-9-16(21d)										0.77	ng/L
	TXM	Headingley(HD)	CAN	-97.4098	49.8689	2015-10-7(21d)										0.33	ng/L
	CLO	Emerson (EM)	CAN	-97.2153	49.0084	2014-5-28(13d)										3.7	ng/L
	CLO	Emerson (EM)	CAN	-97.2153	49.0084	2014-6-10(28d)(42d)										-	ng/L
	CLO	Emerson (EM)	CAN	-97.2153	49.0084	2014-7-8(14d)(59d)										17.3	ng/L
	CLO	Emerson (EM)	CAN	-97.2153	49.0084	2014-7-22(7d)										31.7	ng/L
	CLO	Emerson (EM)	CAN	-97.2153	49.0084	2014-7-29(14d)										4.5	ng/L
	CLO	Emerson (EM)	CAN	-97.2153	49.0084	2014-8-12(14d)										2.3	ng/L
	CLO	Emerson (EM)	CAN	-97.2153	49.0084	2014-8-26(14d)										6.1	ng/L
	CLO	Emerson (EM)	CAN	-97.2153	49.0084	2014-9-9(14d)										5.1	ng/L
	CLO	Emerson (EM)	CAN	-97.2153	49.0084	2014-9-23(14d)										1.4	ng/L
	CLO	Emerson (EM)	CAN	-97.2153	49.0084	2014-10-7(14d)										0.46	ng/L
	CLO	Emerson (EM)	CAN	-97.2153	49.0084	2014-10-21(7d)										0.76	ng/L
	CLO	Emerson (EM)	CAN	-97.2153	49.0084	2015-4-29(14d)										2.4	ng/L
	CLO	Emerson (EM)	CAN	-97.2153	49.0084	2015-5-13(14d)										23.1	ng/L
	CLO	Emerson (EM)	CAN	-97.2153	49.0084	2015-5-27(13d)										10.8	ng/L
	CLO	Emerson (EM)	CAN	-97.2153	49.0084	2015-6-9(14d)										7.5	ng/L
	CLO	Emerson (EM)	CAN	-97.2153	49.0084	2015-6-23(14d)										7.6	ng/L
	CLO	Emerson (EM)	CAN	-97.2153	49.0084	2015-7-7(14d)										11.8	ng/L
	CLO	Emerson (EM)	CAN	-97.2153	49.0084	2015-7-21(14d)										10.6	ng/L
	CLO	Emerson (EM)	CAN	-97.2153	49.0084	2015-8-4(14d)										5.8	ng/L
	CLO	Emerson (EM)	CAN	-97.2153	49.0084	2015-8-18(15d)										5.7	ng/L
	CLO	Emerson (EM)	CAN	-97.2153	49.0084	2015-9-2(14d)										6.9	ng/L
	CLO	Emerson (EM)	CAN	-97.2153	49.0084	2015-9-16(21d)										1.8	ng/L
	CLO	Emerson (EM)	CAN	-97.2153	49.0084	2015-10-7(21d)										0.47	ng/L
	CLO	St.Norbert(NB)	CAN	-97.1377	49.7547	2014-5-28(13d)										-	ng/L
	CLO	St.Norbert(NB)	CAN	-97.1377	49.7547	2014-6-10(28d)(42d)										20.2	ng/L
	CLO	St.Norbert(NB)	CAN	-97.1377	49.7547	2014-7-8(14d)(59d)										28.8	ng/L
	CLO	St.Norbert(NB)	CAN	-97.1377	49.7547	2014-7-22(7d)										12.8	ng/L
	CLO	St.Norbert(NB)	CAN	-97.1377	49.7547	2014-7-29(14d)										4.6	ng/L
	CLO	St.Norbert(NB)	CAN	-97.1377	49.7547	2014-8-12(14d)										1.2	ng/L
	CLO	St.Norbert(NB)	CAN	-97.1377	49.7547	2014-8-26(14d)										8	ng/L
	CLO	St.Norbert(NB)	CAN	-97.1377	49.7547	2014-9-9(14d)										2.8	ng/L
	CLO	St.Norbert(NB)	CAN	-97.1377	49.7547	2014-9-23(14d)										1.2	ng/L
	CLO	St.Norbert(NB)	CAN	-97.1377	49.7547	2014-10-7(14d)										0.41	ng/L
	CLO	St.Norbert(NB)	CAN	-97.1377	49.7547	2014-10-21(7d)										0.34	ng/L
	CLO	St.Norbert(NB)	CAN	-97.1377	49.7547	2015-4-29(14d)										2.4	ng/L
	CLO	St.Norbert(NB)	CAN	-97.1377	49.7547	2015-5-13(14d)										11.8	ng/L
	CLO	St.Norbert(NB)	CAN	-97.1377	49.7547	2015-5-27(13d)										10.1	ng/L
	CLO	St.Norbert(NB)	CAN	-97.1377	49.7547	2015-6-9(14d)										8.6	ng/L
	CLO	St.Norbert(NB)	CAN	-97.1377	49.7547	2015-6-23(14d)										2.7	ng/L
	CLO	St.Norbert(NB)	CAN	-97.1377	49.7547	2015-7-7(14d)										3	ng/L
	CLO	St.Norbert(NB)	CAN	-97.1377	49.7547	2015-7-21(14d)										7.3	ng/L
	CLO	St.Norbert(NB)	CAN	-97.1377	49.7547	2015-8-4(14d)										2.9	ng/L
	CLO	St.Norbert(NB)	CAN	-97.1377	49.7547	2015-8-18(15d)										2.5	ng/L
	CLO	St.Norbert(NB)	CAN	-97.1377	49.7547	2015-9-2(14d)										5.7	ng/L
	CLO	St.Norbert(NB)	CAN	-97.1377	49.7547	2015-9-16(21d)										4	ng/L
	CLO	St.Norbert(NB)	CAN	-97.1377	49.7547	2015-10-7(21d)										0.63	ng/L
	CLO	North End(NE)	CAN	-97.0975	49.9515	2014-5-28(13d)										2.9	ng/L
	CLO	North End(NE)	CAN	-97.0975	49.9515	2014-6-10(28d)(42d)										-	ng/L
	CLO	North End(NE)	CAN	-97.0975	49.9515	2014-7-8(14d)(59d)										20.7	ng/L
	CLO	North End(NE)	CAN	-97.0975	49.9515	2014-7-22(7d)										18.7	ng/L
	CLO	North End(NE)	CAN	-97.0975	49.9515	2014-7-29(14d)										7.8	ng/L
	CLO	North End(NE)	CAN	-97.0975	49.9515	2014-8-12(14d)										3.4	ng/L
	CLO	North End(NE)	CAN	-97.0975	49.9515	2014-8-26(14d)										1.5	ng/L
	CLO	North End(NE)	CAN	-97.0975	49.9515	2014-9-9(14d)										3.9	ng/L
	CLO	North End(NE)	CAN	-97.0975	49.9515	2014-9-23(14d)										2.8	ng/L
	CLO	North End(NE)	CAN	-97.0975	49.9515	2014-10-7(14d)										0.31	ng/L
	CLO	North End(NE)	CAN	-97.0975	49.9515	2014-10-21(7d)										0.83	ng/L
	CLO	North End(NE)	CAN	-97.0975	49.9515	2015-4-29(14d)										2.1	ng/L
	CLO	North End(NE)	CAN	-97.0975	49.9515	2015-5-13(14d)										2.8	ng/L
	CLO	North End(NE)	CAN	-97.0975	49.9515	2015-5-27(13d)										4.4	ng/L
	CLO	North End(NE)	CAN	-97.0975	49.9515	2015-6-9(14d)										5.4	ng/L
	CLO	North End(NE)	CAN	-97.0975	49.9515	2015-6-23(14d)										3.2	ng/L
	CLO	North End(NE)	CAN	-97.0975	49.9515	2015-7-7(14d)										2.3	ng/L
	CLO	North End(NE)	CAN	-97.0975	49.9515	2015-7-21(14d)										2	ng/L
	CLO	North End(NE)	CAN	-97.0975	49.9515	2015-8-4(14d)										8	ng/L
	CLO	North End(NE)	CAN	-97.0975	49.9515	2015-8-18(15d)										4.3	ng/L
	CLO	North End(NE)	CAN	-97.0975	49.9515	2015-9-2(14d)										6.8	ng/L
	CLO	North End(NE)	CAN	-97.0975	49.9515	2015-9-16(21d)										2.2	ng/L
	CLO	North End(NE)	CAN	-97.0975	49.9515	2015-10-7(21d)										0.37	ng/L
	CLO	Selkirk(SK)	CAN	-96.8648	50.1427	2014-5-28(13d)										-	ng/L
	CLO	Selkirk(SK)	CAN	-96.8648	50.1427	2014-6-10(28d)(42d)										21.5	ng/L
	CLO	Selkirk(SK)	CAN	-96.8648	50.1427	2014-7-8(14d)(59d)										22.5	ng/L
	CLO	Selkirk(SK)	CAN	-96.8648	50.1427	2014-7-22(7d)										18.9	ng/L
	CLO	Selkirk(SK)	CAN	-96.8648	50.1427	2014-7-29(14d)										8.8	ng/L
	CLO	Selkirk(SK)	CAN	-96.8648	50.1427	2014-8-12(14d)										3.5	ng/L
	CLO	Selkirk(SK)	CAN	-96.8648	50.1427	2014-8-26(14d)										5.6	ng/L
	CLO	Selkirk(SK)	CAN	-96.8648	50.1427	2014-9-9(14d)										6.8	ng/L
	CLO	Selkirk(SK)	CAN	-96.8648	50.1427	2014-9-23(14d)										4	ng/L
	CLO	Selkirk(SK)	CAN	-96.8648	50.1427	2014-10-7(14d)										0.67	ng/L
	CLO	Selkirk(SK)	CAN	-96.8648	50.1427	2014-10-21(7d)										1.9	ng/L
	CLO	Selkirk(SK)	CAN	-96.8648	50.1427	2015-4-29(14d)										2.5	ng/L
	CLO	Selkirk(SK)	CAN	-96.8648	50.1427	2015-5-13(14d)										2	ng/L
	CLO	Selkirk(SK)	CAN	-96.8648	50.1427	2015-5-27(13d)										10.4	ng/L
	CLO	Selkirk(SK)	CAN	-96.8648	50.1427	2015-6-9(14d)										8.6	ng/L
	CLO	Selkirk(SK)	CAN	-96.8648	50.1427	2015-6-23(14d)										5.1	ng/L
	CLO	Selkirk(SK)	CAN	-96.8648	50.1427	2015-7-7(14d)										7.3	ng/L
	CLO	Selkirk(SK)	CAN	-96.8648	50.1427	2015-7-21(14d)										11.7	ng/L
	CLO	Selkirk(SK)	CAN	-96.8648	50.1427	2015-8-4(14d)										7.1	ng/L
	CLO	Selkirk(SK)	CAN	-96.8648	50.1427	2015-8-18(15d)										8.7	ng/L
	CLO	Selkirk(SK)	CAN	-96.8648	50.1427	2015-9-2(14d)										12.6	ng/L
	CLO	Selkirk(SK)	CAN	-96.8648	50.1427	2015-9-16(21d)										-	ng/L
	CLO	Selkirk(SK)	CAN	-96.8648	50.1427	2015-10-7(21d)										-	ng/L
	CLO	Breezy Point(BP)	CAN	-96.8516	50.2783	2014-5-28(13d)										-	ng/L
	CLO	Breezy Point(BP)	CAN	-96.8516	50.2783	2014-6-10(28d)(42d)										-	ng/L
	CLO	Breezy Point(BP)	CAN	-96.8516	50.2783	2014-7-8(14d)(59d)										20.1	ng/L
	CLO	Breezy Point(BP)	CAN	-96.8516	50.2783	2014-7-22(7d)										8.7	ng/L
	CLO	Breezy Point(BP)	CAN	-96.8516	50.2783	2014-7-29(14d)										5	ng/L
	CLO	Breezy Point(BP)	CAN	-96.8516	50.2783	2014-8-12(14d)										3.3	ng/L
	CLO	Breezy Point(BP)	CAN	-96.8516	50.2783	2014-8-26(14d)										3.3	ng/L
	CLO	Breezy Point(BP)	CAN	-96.8516	50.2783	2014-9-9(14d)										4	ng/L
	CLO	Breezy Point(BP)	CAN	-96.8516	50.2783	2014-9-23(14d)										3.8	ng/L
	CLO	Breezy Point(BP)	CAN	-96.8516	50.2783	2014-10-7(14d)										0.8	ng/L
	CLO	Breezy Point(BP)	CAN	-96.8516	50.2783	2014-10-21(7d)										-	ng/L
	CLO	Breezy Point(BP)	CAN	-96.8516	50.2783	2015-4-29(14d)										-	ng/L
	CLO	Breezy Point(BP)	CAN	-96.8516	50.2783	2015-5-13(14d)										8.6	ng/L
	CLO	Breezy Point(BP)	CAN	-96.8516	50.2783	2015-5-27(13d)										10.3	ng/L
	CLO	Breezy Point(BP)	CAN	-96.8516	50.2783	2015-6-9(14d)										16.9	ng/L
	CLO	Breezy Point(BP)	CAN	-96.8516	50.2783	2015-6-23(14d)										5.7	ng/L
	CLO	Breezy Point(BP)	CAN	-96.8516	50.2783	2015-7-7(14d)										9.4	ng/L
	CLO	Breezy Point(BP)	CAN	-96.8516	50.2783	2015-7-21(14d)										9.8	ng/L
	CLO	Breezy Point(BP)	CAN	-96.8516	50.2783	2015-8-4(14d)										9.1	ng/L
	CLO	Breezy Point(BP)	CAN	-96.8516	50.2783	2015-8-18(15d)										8.8	ng/L
	CLO	Breezy Point(BP)	CAN	-96.8516	50.2783	2015-9-2(14d)										12.7	ng/L
	CLO	Breezy Point(BP)	CAN	-96.8516	50.2783	2015-9-16(21d)										4.7	ng/L
	CLO	Breezy Point(BP)	CAN	-96.8516	50.2783	2015-10-7(21d)										0.65	ng/L
	CLO	Headingley(HD)	CAN	-97.4098	49.8689	2014-5-28(13d)										-	ng/L
	CLO	Headingley(HD)	CAN	-97.4098	49.8689	2014-6-10(28d)(42d)										2.4	ng/L
	CLO	Headingley(HD)	CAN	-97.4098	49.8689	2014-7-8(14d)(59d)										21.5	ng/L
	CLO	Headingley(HD)	CAN	-97.4098	49.8689	2014-7-22(7d)										9.8	ng/L
	CLO	Headingley(HD)	CAN	-97.4098	49.8689	2014-7-29(14d)										8.2	ng/L
	CLO	Headingley(HD)	CAN	-97.4098	49.8689	2014-8-12(14d)										2.9	ng/L
	CLO	Headingley(HD)	CAN	-97.4098	49.8689	2014-8-26(14d)										3.6	ng/L
	CLO	Headingley(HD)	CAN	-97.4098	49.8689	2014-9-9(14d)										5	ng/L
	CLO	Headingley(HD)	CAN	-97.4098	49.8689	2014-9-23(14d)										0.69	ng/L
	CLO	Headingley(HD)	CAN	-97.4098	49.8689	2014-10-7(14d)										1.2	ng/L
	CLO	Headingley(HD)	CAN	-97.4098	49.8689	2014-10-21(7d)										3.1	ng/L
	CLO	Headingley(HD)	CAN	-97.4098	49.8689	2015-4-29(14d)										3.2	ng/L
	CLO	Headingley(HD)	CAN	-97.4098	49.8689	2015-5-13(14d)										2.9	ng/L
	CLO	Headingley(HD)	CAN	-97.4098	49.8689	2015-5-27(13d)										2.8	ng/L
	CLO	Headingley(HD)	CAN	-97.4098	49.8689	2015-6-9(14d)										3.1	ng/L
	CLO	Headingley(HD)	CAN	-97.4098	49.8689	2015-6-23(14d)										4.6	ng/L
	CLO	Headingley(HD)	CAN	-97.4098	49.8689	2015-7-7(14d)										1.7	ng/L
	CLO	Headingley(HD)	CAN	-97.4098	49.8689	2015-7-21(14d)										1.8	ng/L
	CLO	Headingley(HD)	CAN	-97.4098	49.8689	2015-8-4(14d)										7.5	ng/L
	CLO	Headingley(HD)	CAN	-97.4098	49.8689	2015-8-18(15d)										2.6	ng/L
	CLO	Headingley(HD)	CAN	-97.4098	49.8689	2015-9-2(14d)										2.9	ng/L
	CLO	Headingley(HD)	CAN	-97.4098	49.8689	2015-9-16(21d)										1.2	ng/L
	CLO	Headingley(HD)	CAN	-97.4098	49.8689	2015-10-7(21d)										0.46	ng/L
	CLO	Emerson (EM)	CAN	-97.2153	49.0084	2014-5-28(13d)										2	ng/L
	CLO	Emerson (EM)	CAN	-97.2153	49.0084	2014-6-10(28d)(42d)										-	ng/L
	CLO	Emerson (EM)	CAN	-97.2153	49.0084	2014-7-8(14d)(59d)										2.1	ng/L
	CLO	Emerson (EM)	CAN	-97.2153	49.0084	2014-7-22(7d)										14.1	ng/L
	CLO	Emerson (EM)	CAN	-97.2153	49.0084	2014-7-29(14d)										3.1	ng/L
	CLO	Emerson (EM)	CAN	-97.2153	49.0084	2014-8-12(14d)										1.2	ng/L
	CLO	Emerson (EM)	CAN	-97.2153	49.0084	2014-8-26(14d)										2.1	ng/L
	CLO	Emerson (EM)	CAN	-97.2153	49.0084	2014-9-9(14d)										1.9	ng/L
	CLO	Emerson (EM)	CAN	-97.2153	49.0084	2014-9-23(14d)										1.6	ng/L
	CLO	Emerson (EM)	CAN	-97.2153	49.0084	2014-10-7(14d)										0.9	ng/L
	CLO	Emerson (EM)	CAN	-97.2153	49.0084	2014-10-21(7d)										ND	ng/L
	CLO	Emerson (EM)	CAN	-97.2153	49.0084	2015-4-29(14d)										0.52	ng/L
	CLO	Emerson (EM)	CAN	-97.2153	49.0084	2015-5-13(14d)										11.3	ng/L
	CLO	Emerson (EM)	CAN	-97.2153	49.0084	2015-5-27(13d)										4.1	ng/L
	CLO	Emerson (EM)	CAN	-97.2153	49.0084	2015-6-9(14d)										5.1	ng/L
	CLO	Emerson (EM)	CAN	-97.2153	49.0084	2015-6-23(14d)										3.8	ng/L
	CLO	Emerson (EM)	CAN	-97.2153	49.0084	2015-7-7(14d)										6.5	ng/L
	CLO	Emerson (EM)	CAN	-97.2153	49.0084	2015-7-21(14d)										6.8	ng/L
	CLO	Emerson (EM)	CAN	-97.2153	49.0084	2015-8-4(14d)										1.86	ng/L
	CLO	Emerson (EM)	CAN	-97.2153	49.0084	2015-8-18(15d)										2.9	ng/L
	CLO	Emerson (EM)	CAN	-97.2153	49.0084	2015-9-2(14d)										3.8	ng/L
	CLO	Emerson (EM)	CAN	-97.2153	49.0084	2015-9-16(21d)										1.2	ng/L
	CLO	Emerson (EM)	CAN	-97.2153	49.0084	2015-10-7(21d)										0.38	ng/L
	CLO	St.Norbert(NB)	CAN	-97.1377	49.7547	2014-5-28(13d)										-	ng/L
	CLO	St.Norbert(NB)	CAN	-97.1377	49.7547	2014-6-10(28d)(42d)										9	ng/L
	CLO	St.Norbert(NB)	CAN	-97.1377	49.7547	2014-7-8(14d)(59d)										10.4	ng/L
	CLO	St.Norbert(NB)	CAN	-97.1377	49.7547	2014-7-22(7d)										4.1	ng/L
	CLO	St.Norbert(NB)	CAN	-97.1377	49.7547	2014-7-29(14d)										3.8	ng/L
	CLO	St.Norbert(NB)	CAN	-97.1377	49.7547	2014-8-12(14d)										0.6	ng/L
	CLO	St.Norbert(NB)	CAN	-97.1377	49.7547	2014-8-26(14d)										2.2	ng/L
	CLO	St.Norbert(NB)	CAN	-97.1377	49.7547	2014-9-9(14d)										1.1	ng/L
	CLO	St.Norbert(NB)	CAN	-97.1377	49.7547	2014-9-23(14d)										0.78	ng/L
	CLO	St.Norbert(NB)	CAN	-97.1377	49.7547	2014-10-7(14d)										0.7	ng/L
	CLO	St.Norbert(NB)	CAN	-97.1377	49.7547	2014-10-21(7d)										ND	ng/L
	CLO	St.Norbert(NB)	CAN	-97.1377	49.7547	2015-4-29(14d)										0.72	ng/L
	CLO	St.Norbert(NB)	CAN	-97.1377	49.7547	2015-5-13(14d)										3.34	ng/L
	CLO	St.Norbert(NB)	CAN	-97.1377	49.7547	2015-5-27(13d)										2.9	ng/L
	CLO	St.Norbert(NB)	CAN	-97.1377	49.7547	2015-6-9(14d)										5.4	ng/L
	CLO	St.Norbert(NB)	CAN	-97.1377	49.7547	2015-6-23(14d)										1.6	ng/L
	CLO	St.Norbert(NB)	CAN	-97.1377	49.7547	2015-7-7(14d)										1.1	ng/L
	CLO	St.Norbert(NB)	CAN	-97.1377	49.7547	2015-7-21(14d)										3	ng/L
	CLO	St.Norbert(NB)	CAN	-97.1377	49.7547	2015-8-4(14d)										1.26	ng/L
	CLO	St.Norbert(NB)	CAN	-97.1377	49.7547	2015-8-18(15d)										1.4	ng/L
	CLO	St.Norbert(NB)	CAN	-97.1377	49.7547	2015-9-2(14d)										2.2	ng/L
	CLO	St.Norbert(NB)	CAN	-97.1377	49.7547	2015-9-16(21d)										1.4	ng/L
	CLO	St.Norbert(NB)	CAN	-97.1377	49.7547	2015-10-7(21d)										0.45	ng/L
	CLO	North End(NE)	CAN	-97.0975	49.9515	2014-5-28(13d)										1.3	ng/L
	CLO	North End(NE)	CAN	-97.0975	49.9515	2014-6-10(28d)(42d)										-	ng/L
	CLO	North End(NE)	CAN	-97.0975	49.9515	2014-7-8(14d)(59d)										5.8	ng/L
	CLO	North End(NE)	CAN	-97.0975	49.9515	2014-7-22(7d)										5	ng/L
	CLO	North End(NE)	CAN	-97.0975	49.9515	2014-7-29(14d)										3.5	ng/L
	CLO	North End(NE)	CAN	-97.0975	49.9515	2014-8-12(14d)										0.8	ng/L
	CLO	North End(NE)	CAN	-97.0975	49.9515	2014-8-26(14d)										0.4	ng/L
	CLO	North End(NE)	CAN	-97.0975	49.9515	2014-9-9(14d)										1.2	ng/L
	CLO	North End(NE)	CAN	-97.0975	49.9515	2014-9-23(14d)										2.1	ng/L
	CLO	North End(NE)	CAN	-97.0975	49.9515	2014-10-7(14d)										0.6	ng/L
	CLO	North End(NE)	CAN	-97.0975	49.9515	2014-10-21(7d)										ND	ng/L
	CLO	North End(NE)	CAN	-97.0975	49.9515	2015-4-29(14d)										0.38	ng/L
	CLO	North End(NE)	CAN	-97.0975	49.9515	2015-5-13(14d)										0.78	ng/L
	CLO	North End(NE)	CAN	-97.0975	49.9515	2015-5-27(13d)										1.7	ng/L
	CLO	North End(NE)	CAN	-97.0975	49.9515	2015-6-9(14d)										3.3	ng/L
	CLO	North End(NE)	CAN	-97.0975	49.9515	2015-6-23(14d)										1.7	ng/L
	CLO	North End(NE)	CAN	-97.0975	49.9515	2015-7-7(14d)										0.87	ng/L
	CLO	North End(NE)	CAN	-97.0975	49.9515	2015-7-21(14d)										1	ng/L
	CLO	North End(NE)	CAN	-97.0975	49.9515	2015-8-4(14d)										2.4	ng/L
	CLO	North End(NE)	CAN	-97.0975	49.9515	2015-8-18(15d)										2.3	ng/L
	CLO	North End(NE)	CAN	-97.0975	49.9515	2015-9-2(14d)										2.9	ng/L
	CLO	North End(NE)	CAN	-97.0975	49.9515	2015-9-16(21d)										0.86	ng/L
	CLO	North End(NE)	CAN	-97.0975	49.9515	2015-10-7(21d)										0.27	ng/L
	CLO	Selkirk(SK)	CAN	-96.8648	50.1427	2014-5-28(13d)										-	ng/L
	CLO	Selkirk(SK)	CAN	-96.8648	50.1427	2014-6-10(28d)(42d)										8.5	ng/L
	CLO	Selkirk(SK)	CAN	-96.8648	50.1427	2014-7-8(14d)(59d)										5.1	ng/L
	CLO	Selkirk(SK)	CAN	-96.8648	50.1427	2014-7-22(7d)										5.5	ng/L
	CLO	Selkirk(SK)	CAN	-96.8648	50.1427	2014-7-29(14d)										3.4	ng/L
	CLO	Selkirk(SK)	CAN	-96.8648	50.1427	2014-8-12(14d)										0.8	ng/L
	CLO	Selkirk(SK)	CAN	-96.8648	50.1427	2014-8-26(14d)										1.9	ng/L
	CLO	Selkirk(SK)	CAN	-96.8648	50.1427	2014-9-9(14d)										4.8	ng/L
	CLO	Selkirk(SK)	CAN	-96.8648	50.1427	2014-9-23(14d)										4.5	ng/L
	CLO	Selkirk(SK)	CAN	-96.8648	50.1427	2014-10-7(14d)										0.6	ng/L
	CLO	Selkirk(SK)	CAN	-96.8648	50.1427	2014-10-21(7d)										ND	ng/L
	CLO	Selkirk(SK)	CAN	-96.8648	50.1427	2015-4-29(14d)										0.53	ng/L
	CLO	Selkirk(SK)	CAN	-96.8648	50.1427	2015-5-13(14d)										0.48	ng/L
	CLO	Selkirk(SK)	CAN	-96.8648	50.1427	2015-5-27(13d)										3.7	ng/L
	CLO	Selkirk(SK)	CAN	-96.8648	50.1427	2015-6-9(14d)										5.7	ng/L
	CLO	Selkirk(SK)	CAN	-96.8648	50.1427	2015-6-23(14d)										1.9	ng/L
	CLO	Selkirk(SK)	CAN	-96.8648	50.1427	2015-7-7(14d)										2.8	ng/L
	CLO	Selkirk(SK)	CAN	-96.8648	50.1427	2015-7-21(14d)										5	ng/L
	CLO	Selkirk(SK)	CAN	-96.8648	50.1427	2015-8-4(14d)										2.5	ng/L
	CLO	Selkirk(SK)	CAN	-96.8648	50.1427	2015-8-18(15d)										4.3	ng/L
	CLO	Selkirk(SK)	CAN	-96.8648	50.1427	2015-9-2(14d)										4	ng/L
	CLO	Selkirk(SK)	CAN	-96.8648	50.1427	2015-9-16(21d)										-	ng/L
	CLO	Selkirk(SK)	CAN	-96.8648	50.1427	2015-10-7(21d)										-	ng/L
	CLO	Breezy Point(BP)	CAN	-96.8516	50.2783	2014-5-28(13d)										-	ng/L
	CLO	Breezy Point(BP)	CAN	-96.8516	50.2783	2014-6-10(28d)(42d)										-	ng/L
	CLO	Breezy Point(BP)	CAN	-96.8516	50.2783	2014-7-8(14d)(59d)										5	ng/L
	CLO	Breezy Point(BP)	CAN	-96.8516	50.2783	2014-7-22(7d)										2.2	ng/L
	CLO	Breezy Point(BP)	CAN	-96.8516	50.2783	2014-7-29(14d)										1.9	ng/L
	CLO	Breezy Point(BP)	CAN	-96.8516	50.2783	2014-8-12(14d)										0.7	ng/L
	CLO	Breezy Point(BP)	CAN	-96.8516	50.2783	2014-8-26(14d)										1	ng/L
	CLO	Breezy Point(BP)	CAN	-96.8516	50.2783	2014-9-9(14d)										2.3	ng/L
	CLO	Breezy Point(BP)	CAN	-96.8516	50.2783	2014-9-23(14d)										1.6	ng/L
	CLO	Breezy Point(BP)	CAN	-96.8516	50.2783	2014-10-7(14d)										0.8	ng/L
	CLO	Breezy Point(BP)	CAN	-96.8516	50.2783	2014-10-21(7d)										-	ng/L
	CLO	Breezy Point(BP)	CAN	-96.8516	50.2783	2015-4-29(14d)										-	ng/L
	CLO	Breezy Point(BP)	CAN	-96.8516	50.2783	2015-5-13(14d)										2	ng/L
	CLO	Breezy Point(BP)	CAN	-96.8516	50.2783	2015-5-27(13d)										3.6	ng/L
	CLO	Breezy Point(BP)	CAN	-96.8516	50.2783	2015-6-9(14d)										10	ng/L
	CLO	Breezy Point(BP)	CAN	-96.8516	50.2783	2015-6-23(14d)										2.4	ng/L
	CLO	Breezy Point(BP)	CAN	-96.8516	50.2783	2015-7-7(14d)										3.6	ng/L
	CLO	Breezy Point(BP)	CAN	-96.8516	50.2783	2015-7-21(14d)										4.1	ng/L
	CLO	Breezy Point(BP)	CAN	-96.8516	50.2783	2015-8-4(14d)										3	ng/L
	CLO	Breezy Point(BP)	CAN	-96.8516	50.2783	2015-8-18(15d)										2.8	ng/L
	CLO	Breezy Point(BP)	CAN	-96.8516	50.2783	2015-9-2(14d)										5	ng/L
	CLO	Breezy Point(BP)	CAN	-96.8516	50.2783	2015-9-16(21d)										1.2	ng/L
	CLO	Breezy Point(BP)	CAN	-96.8516	50.2783	2015-10-7(21d)										0.25	ng/L
	CLO	Headingley(HD)	CAN	-97.4098	49.8689	2014-5-28(13d)										-	ng/L
	CLO	Headingley(HD)	CAN	-97.4098	49.8689	2014-6-10(28d)(42d)										0.4	ng/L
	CLO	Headingley(HD)	CAN	-97.4098	49.8689	2014-7-8(14d)(59d)										2.7	ng/L
	CLO	Headingley(HD)	CAN	-97.4098	49.8689	2014-7-22(7d)										1.8	ng/L
	CLO	Headingley(HD)	CAN	-97.4098	49.8689	2014-7-29(14d)										1.4	ng/L
	CLO	Headingley(HD)	CAN	-97.4098	49.8689	2014-8-12(14d)										1	ng/L
	CLO	Headingley(HD)	CAN	-97.4098	49.8689	2014-8-26(14d)										0.9	ng/L
	CLO	Headingley(HD)	CAN	-97.4098	49.8689	2014-9-9(14d)										2.8	ng/L
	CLO	Headingley(HD)	CAN	-97.4098	49.8689	2014-9-23(14d)										0.8	ng/L
	CLO	Headingley(HD)	CAN	-97.4098	49.8689	2014-10-7(14d)										ND	ng/L
	CLO	Headingley(HD)	CAN	-97.4098	49.8689	2014-10-21(7d)										ND	ng/L
	CLO	Headingley(HD)	CAN	-97.4098	49.8689	2015-4-29(14d)										0.94	ng/L
	CLO	Headingley(HD)	CAN	-97.4098	49.8689	2015-5-13(14d)										0.5	ng/L
	CLO	Headingley(HD)	CAN	-97.4098	49.8689	2015-5-27(13d)										0.54	ng/L
	CLO	Headingley(HD)	CAN	-97.4098	49.8689	2015-6-9(14d)										1.3	ng/L
	CLO	Headingley(HD)	CAN	-97.4098	49.8689	2015-6-23(14d)										1.3	ng/L
	CLO	Headingley(HD)	CAN	-97.4098	49.8689	2015-7-7(14d)										0.6	ng/L
	CLO	Headingley(HD)	CAN	-97.4098	49.8689	2015-7-21(14d)										0.61	ng/L
	CLO	Headingley(HD)	CAN	-97.4098	49.8689	2015-8-4(14d)										1.1	ng/L
	CLO	Headingley(HD)	CAN	-97.4098	49.8689	2015-8-18(15d)										ND	ng/L
	CLO	Headingley(HD)	CAN	-97.4098	49.8689	2015-9-2(14d)										0.39	ng/L
	CLO	Headingley(HD)	CAN	-97.4098	49.8689	2015-9-16(21d)										0.22	ng/L
	CLO	Headingley(HD)	CAN	-97.4098	49.8689	2015-10-7(21d)										ND	ng/L
Neonicotinoid insecticide residues in subsurface drainage and open ditch water around maize fields in southwestern Ontario Neonicotinoid Insecticide Residues in Surface Water and Soil Associated with Commercial Maize (Corn) Fields in Southwestern Ontario	CLO	WA007	CAN	-82.3023	42.941	2013-05-13										151	ng/L
	CLO	WA008	CAN	-82.3023	42.941	2013-05-13										985	ng/L
	CLO	WA013	CAN	-81.0876	42.7459	2013-05-08										139	ng/L
	CLO	WA020	CAN	-82.7918	42.0902	2013-05-14										40.25	ng/L
	CLO	WA026	CAN	-82.3023	42.941	2013-05-24										37.8	ng/L
	CLO	WA033	CAN	-81.4992	43.1001	2013-05-14										18.2	ng/L
	CLO	WA040	CAN	-82.375	42.9094	2013-05-08										510	ng/L
	CLO	WA046	CAN	-82.3876	42.905	2013-05-16										625	ng/L
	CLO	WA047	CAN	-82.3876	42.905	2013-05-16										175	ng/L
	CLO	WA051	CAN	-81.0876	42.7459	2013-05-15										3925	ng/L
	CLO	WA065	CAN	-82.5961	42.1935	2013-05-01										351.5	ng/L
	CLO	WA066	CAN	-82.5961	42.1935	2013-05-01										620	ng/L
	CLO	WA070	CAN	-81.9267	42.8277	2013-05-13										580	ng/L
	CLO	WA083	CAN	-81.0876	42.7459	2013-05-10										1060	ng/L
	CLO	WA125	CAN	-81.9936	42.44	2013-05-29										1455	ng/L
	CLO	WA126	CAN	-81.9985	42.435	2013-06-21										1500	ng/L
	CLO	WA129	CAN	-81.9936	42.44	2013-05-29										7200	ng/L
	CLO	WA133	CAN	-82.3876	42.905	2013-05-30										3575	ng/L
	CLO	WA145	CAN	-82.7717	42.1003	2013-05-27										82	ng/L
	CLO	WA146	CAN	-82.7717	42.1003	2013-05-27										20.7	ng/L
	CLO	WA148	CAN	-81.7665	42.7784	2013-05-22										42.5	ng/L
	CLO	WA149	CAN	-81.7665	42.7784	2013-05-22										39.25	ng/L
	CLO	WA151	CAN	-81.0876	42.7459	2013-05-10										71.5	ng/L
	CLO	WA152	CAN	-82.7717	42.1003	2013-04-30										2565	ng/L
	CLO	WA153	CAN	-82.7717	42.1003	2013-04-30										5400	ng/L
	CLO	WA154	CAN	-82.7717	42.1003	2013-04-30										62	ng/L
	CLO	WA155	CAN	-82.7717	42.1003	2013-05-09										1095	ng/L
	CLO	WA156	CAN	-82.7717	42.1003	2013-05-09										89.5	ng/L
	CLO	WA157	CAN	-82.7717	42.1003	2013-05-14										257.5	ng/L
	CLO	WA158	CAN	-82.7717	42.1003	2013-05-14										1550	ng/L
	CLO	WA159	CAN	-82.7717	42.1003	2013-05-21										1075	ng/L
	CLO	WA160	CAN	-82.7717	42.1003	2013-05-21										1115	ng/L
	CLO	WA161	CAN	-82.7717	42.1003	2013-06-03										1670	ng/L
	CLO	WA162	CAN	-82.7717	42.1003	2013-06-03										2745	ng/L
	CLO	WA163	CAN	-82.7717	42.1003	2013-06-11										329.5	ng/L
	CLO	WA164	CAN	-82.7717	42.1003	2013-06-17										5000	ng/L
	CLO	WA165	CAN	-82.7717	42.1003	2013-06-17										211	ng/L
	CLO	WA166	CAN	-82.7717	42.1003	2013-06-25										1605	ng/L
	CLO	WA167	CAN	-82.7717	42.1003	2013-06-25										1175	ng/L
	CLO	WA168	CAN	-82.7918	42.0902	2013-04-30										1480	ng/L
	CLO	WA169	CAN	-82.7918	42.0902	2013-04-30										520	ng/L
	CLO	WA170	CAN	-82.7918	42.0902	2013-05-14										945	ng/L
	CLO	WA171	CAN	-82.7918	42.0902	2013-05-21										2120	ng/L
	CLO	WA172	CAN	-82.7918	42.0902	2013-05-29										45100	ng/L
	CLO	WA173	CAN	-82.7918	42.0902	2013-06-03										377	ng/L
	CLO	WA174	CAN	-82.7918	42.0902	2013-06-11										600	ng/L
	CLO	WA175	CAN	-82.7918	42.0902	2013-06-17										437.5	ng/L
	CLO	WA176	CAN	-82.5961	42.1935	2013-05-01										3755	ng/L
	CLO	WA177	CAN	-82.5961	42.1935	2013-05-01										800	ng/L
	CLO	WA178	CAN	-82.5961	42.1935	2013-05-01										655	ng/L
	CLO	WA179	CAN	-82.5961	42.1935	2013-05-15										1490	ng/L
	CLO	WA180	CAN	-82.5961	42.1935	2013-05-21										270	ng/L
	CLO	WA182	CAN	-82.6241	42.1986	2013-05-01										650	ng/L
	CLO	WA183	CAN	-82.6241	42.1986	2013-05-15										1525	ng/L
	CLO	WA185	CAN	-82.6241	42.1986	2013-05-15										98.5	ng/L
	CLO	WA188	CAN	-82.6241	42.1986	2013-05-27										860	ng/L
	CLO	WA189	CAN	-82.6241	42.1986	2013-06-03										625	ng/L
	CLO	WA190	CAN	-82.6241	42.1986	2013-06-11										680	ng/L
	CLO	WA191	CAN	-82.6241	42.1986	2013-06-11										655	ng/L
	CLO	WA192	CAN	-82.6241	42.1986	2013-06-11										630	ng/L
	CLO	WA193	CAN	-82.6241	42.1986	2013-06-17										389.5	ng/L
	CLO	WA194	CAN	-82.6241	42.1986	2013-06-17										1565	ng/L
	CLO	WA195	CAN	-82.6241	42.1986	2013-06-25										205.5	ng/L
	CLO	WA196	CAN	-82.6241	42.1986	2013-06-25										414	ng/L
	CLO	WA197	CAN	-82.6241	42.1986	2013-05-02										1535	ng/L
	CLO	WA198	CAN	-82.6241	42.1986	2013-05-23										393.5	ng/L
	CLO	WA199	CAN	-82.6241	42.1986	2013-05-29										625	ng/L
	CLO	WA200	CAN	-82.6241	42.1986	2013-06-21										835	ng/L
	CLO	WA201	CAN	-82.6241	42.1986	2013-05-02										1035	ng/L
	CLO	WA202	CAN	-82.6241	42.1986	2013-05-13										321	ng/L
	CLO	WA203	CAN	-82.6241	42.1986	2013-05-23										5150	ng/L
	CLO	WA205	CAN	-82.6241	42.1986	2013-05-23										1690	ng/L
	CLO	WA206	CAN	-82.6241	42.1986	2013-05-29										3165	ng/L
	CLO	WA207	CAN	-82.6241	42.1986	2013-06-06										1505	ng/L
	CLO	WA209	CAN	-82.3876	42.905	2013-05-03										3070	ng/L
	CLO	WA210	CAN	-82.375	42.9094	2013-05-03										985	ng/L
	CLO	WA211	CAN	-82.375	42.9094	2013-05-24										34.55	ng/L
	CLO	WA212	CAN	-82.375	42.9094	2013-06-05										1875	ng/L
	CLO	WA213	CAN	-82.375	42.9094	2013-06-11										283.5	ng/L
	CLO	WA214	CAN	-82.375	42.9094	2013-06-20										1605	ng/L
	CLO	WA215	CAN	-82.3023	42.941	2013-05-03										2330	ng/L
	CLO	WA216	CAN	-82.3023	42.941	2013-05-03										0	ng/L
	CLO	WA217	CAN	-82.3023	42.941	2013-05-10										1240	ng/L
	CLO	WA218	CAN	-82.3023	42.941	2013-05-10										3850	ng/L
	CLO	WA219	CAN	-82.3023	42.941	2013-06-12										90	ng/L
	CLO	WA220	CAN	-82.3023	42.941	2013-06-20										0	ng/L
	CLO	WA221	CAN	-81.9267	42.8277	2013-04-30										150	ng/L
	CLO	WA222	CAN	-81.9267	42.8277	2013-05-07										575	ng/L
	CLO	WA223	CAN	-81.9267	42.8277	2013-05-07										0	ng/L
	CLO	WA224	CAN	-81.9267	42.8277	2013-05-22										172	ng/L
	CLO	WA225	CAN	-81.9267	42.8277	2013-05-22										2845	ng/L
	CLO	WA226	CAN	-81.9267	42.8277	2013-06-04										765	ng/L
	CLO	WA227	CAN	-81.9267	42.8277	2013-06-19										800	ng/L
	CLO	WA229	CAN	-81.9267	42.8277	2013-06-24										384.5	ng/L
	CLO	WA230	CAN	-81.9267	42.8277	2013-04-30										3595	ng/L
	CLO	WA231	CAN	-81.9245	42.8229	2013-05-07										155	ng/L
	CLO	WA232	CAN	-81.9245	42.8229	2013-05-07										414	ng/L
	CLO	WA233	CAN	-81.9245	42.8229	2013-05-07										655	ng/L
	CLO	WA234	CAN	-81.9245	42.8229	2013-05-13										96	ng/L
	CLO	WA235	CAN	-81.9245	42.8229	2013-05-13										1435	ng/L
	CLO	WA236	CAN	-81.9245	42.8229	2013-05-13										750	ng/L
	CLO	WA237	CAN	-81.9245	42.8229	2013-05-22										1410	ng/L
	CLO	WA238	CAN	-81.9245	42.8229	2013-05-22										1570	ng/L
	CLO	WA239	CAN	-81.9245	42.8229	2013-05-22										1825	ng/L
	CLO	WA240	CAN	-81.9245	42.8229	2013-05-31										1080	ng/L
	CLO	WA241	CAN	-81.9245	42.8229	2013-05-31										301.5	ng/L
	CLO	WA242	CAN	-81.9245	42.8229	2013-05-31										820	ng/L
	CLO	WA243	CAN	-81.9245	42.8229	2013-06-04										263	ng/L
	CLO	WA244	CAN	-81.9245	42.8229	2013-06-04										497.5	ng/L
	CLO	WA245	CAN	-81.9245	42.8229	2013-06-04										740	ng/L
	CLO	WA246	CAN	-81.9245	42.8229	2013-06-12										0	ng/L
	CLO	WA247	CAN	-81.9245	42.8229	2013-06-19										720	ng/L
	CLO	WA248	CAN	-81.9245	42.8229	2013-06-19										323.5	ng/L
	CLO	WA249	CAN	-81.9245	42.8229	2013-06-24										196.5	ng/L
	CLO	WA250	CAN	-81.9245	42.8229	2013-04-30										471	ng/L
	CLO	WA251	CAN	-81.9245	42.8229	2013-04-30										615	ng/L
	CLO	WA252	CAN	-81.7816	42.7838	2013-04-27										2065	ng/L
	CLO	WA253	CAN	-81.7816	42.7838	2013-05-10										625	ng/L
	CLO	WA254	CAN	-81.7816	42.7838	2013-05-22										620	ng/L
	CLO	WA255	CAN	-81.7816	42.7838	2013-06-04										267.5	ng/L
	CLO	WA256	CAN	-81.7665	42.7784	2013-05-09										2215	ng/L
	CLO	WA257	CAN	-81.7665	42.7784	2013-05-09										1320	ng/L
	CLO	WA258	CAN	-81.7665	42.7784	2013-05-15										0	ng/L
	CLO	WA259	CAN	-81.7665	42.7784	2013-05-22										151.5	ng/L
	CLO	WA260	CAN	-81.4992	43.1001	2013-05-02										1390	ng/L
	CLO	WA261	CAN	-81.4992	43.1001	2013-05-08										860	ng/L
	CLO	WA262	CAN	-81.0876	42.7459	2013-05-27										1405	ng/L
	CLO	WA263	CAN	-81.1138	42.7315	2013-04-30										0	ng/L
	CLO	WA264	CAN	-82.7717	42.1003	2013-05-14										0	ng/L
	CLO	WA265	CAN	-82.7717	42.1003	2013-05-21										860	ng/L
	CLO	WA266	CAN	-82.7717	42.1003	2013-06-03										1580	ng/L
	CLO	WA267	CAN	-82.7717	42.1003	2013-06-11										1605	ng/L
	CLO	WA268	CAN	-82.7717	42.1003	2013-06-25										173	ng/L
	CLO	WA269	CAN	-82.5961	42.1935	2013-05-15										0	ng/L
	CLO	WA271	CAN	-82.5961	42.1935	2013-05-21										470.5	ng/L
	CLO	WA272	CAN	-82.5961	42.1935	2013-05-27										310	ng/L
	CLO	WA273	CAN	-82.5961	42.1935	2013-05-27										0	ng/L
	CLO	WA275	CAN	-82.5961	42.1935	2013-06-11										304	ng/L
	CLO	WA276	CAN	-82.5961	42.1935	2013-06-11										0	ng/L
	CLO	WA277	CAN	-82.5961	42.1935	2013-06-17										2505	ng/L
	CLO	WA278	CAN	-82.5961	42.1935	2013-06-17										373.5	ng/L
	CLO	WA279	CAN	-82.5961	42.1935	2013-06-25										1155	ng/L
	CLO	WA280	CAN	-82.5961	42.1935	2013-06-25										2035	ng/L
	CLO	WA281	CAN	-82.6241	42.1986	2013-05-21										58	ng/L
	CLO	WA282	CAN	-82.6241	42.1986	2013-06-03										2015	ng/L
	CLO	WA283	CAN	-82.6241	42.1986	2013-06-25										2120	ng/L
	CLO	WA284	CAN	-82.3876	42.905	2013-05-24										315.5	ng/L
	CLO	WA285	CAN	-82.3876	42.905	2013-06-05										910	ng/L
	CLO	WA286	CAN	-82.3876	42.905	2013-06-20										317	ng/L
	CLO	WA287	CAN	-82.3023	42.941	2013-05-03										0	ng/L
	CLO	WA288	CAN	-81.9267	42.8277	2013-05-31										1970	ng/L
	CLO	WA289	CAN	-81.9267	42.8277	2013-06-12										730	ng/L
	CLO	WA291	CAN	-81.7665	42.7784	2013-05-15										123	ng/L
	CLO	WA292	CAN	-81.7665	42.7784	2013-06-04										317	ng/L
	CLO	WA293	CAN	-81.7665	42.7784	2013-06-04										520	ng/L
	CLO	WA294	CAN	-81.7665	42.7784	2013-06-14										127	ng/L
	CLO	WA295	CAN	-81.7665	42.7784	2013-06-19										665	ng/L
	CLO	WA296	CAN	-81.7665	42.7784	2013-06-19										1605	ng/L
	CLO	WA297	CAN	-81.7665	42.7784	2013-06-24										3660	ng/L
	CLO	WA298	CAN	-81.7665	42.7784	2013-06-24										1170	ng/L
	CLO	WA299	CAN	-81.4992	43.1001	2013-05-14										57	ng/L
	CLO	WA300	CAN	-81.4992	43.1001	2013-05-21										105.5	ng/L
	CLO	WA301	CAN	-81.4992	43.1001	2013-06-06										0	ng/L
	CLO	WA302	CAN	-81.4992	43.1001	2013-06-14										222	ng/L
	CLO	WA303	CAN	-81.4992	43.1001	2013-06-18										49.4	ng/L
	CLO	WA304	CAN	-81.4992	43.1001	2013-06-26										1800	ng/L
	CLO	WA305	CAN	-81.4815	43.1027	2013-05-07										1065	ng/L
	CLO	WA306	CAN	-81.0876	42.7459	2013-05-01										65	ng/L
	CLO	WA307	CAN	-81.0876	42.7459	2013-05-21										620	ng/L
	CLO	WA308	CAN	-81.1138	42.7315	2013-05-10										6950	ng/L
	TXM	WA007	CAN	-82.3023	42.941	2013-05-13										17.65	ng/L
	TXM	WA008	CAN	-82.3023	42.941	2013-05-13										98	ng/L
	TXM	WA013	CAN	-81.0876	42.7459	2013-05-08										38.7	ng/L
	TXM	WA020	CAN	-82.7918	42.0902	2013-05-14										33.1	ng/L
	TXM	WA026	CAN	-82.3023	42.941	2013-05-24										0	ng/L
	TXM	WA033	CAN	-81.4992	43.1001	2013-05-14										0	ng/L
	TXM	WA040	CAN	-82.375	42.9094	2013-05-08										590	ng/L
	TXM	WA046	CAN	-82.3876	42.905	2013-05-16										1155	ng/L
	TXM	WA047	CAN	-82.3876	42.905	2013-05-16										0	ng/L
	TXM	WA051	CAN	-81.0876	42.7459	2013-05-15										505	ng/L
	TXM	WA065	CAN	-82.5961	42.1935	2013-05-01										266	ng/L
	TXM	WA066	CAN	-82.5961	42.1935	2013-05-01										376	ng/L
	TXM	WA070	CAN	-81.9267	42.8277	2013-05-13										1915	ng/L
	TXM	WA083	CAN	-81.0876	42.7459	2013-05-10										1455	ng/L
	TXM	WA125	CAN	-81.9936	42.44	2013-05-29										3820	ng/L
	TXM	WA126	CAN	-81.9985	42.435	2013-06-21										3125	ng/L
	TXM	WA129	CAN	-81.9936	42.44	2013-05-29										505	ng/L
	TXM	WA133	CAN	-82.3876	42.905	2013-05-30										2630	ng/L
	TXM	WA145	CAN	-82.7717	42.1003	2013-05-27										61.5	ng/L
	TXM	WA146	CAN	-82.7717	42.1003	2013-05-27										94.5	ng/L
	TXM	WA148	CAN	-81.7665	42.7784	2013-05-22										1570	ng/L
	TXM	WA149	CAN	-81.7665	42.7784	2013-05-22										24.4	ng/L
	TXM	WA151	CAN	-81.0876	42.7459	2013-05-10										61.5	ng/L
	TXM	WA152	CAN	-82.7717	42.1003	2013-04-30										123	ng/L
	TXM	WA153	CAN	-82.7717	42.1003	2013-04-30										900	ng/L
	TXM	WA154	CAN	-82.7717	42.1003	2013-04-30										201	ng/L
	TXM	WA155	CAN	-82.7717	42.1003	2013-05-09										74.5	ng/L
	TXM	WA156	CAN	-82.7717	42.1003	2013-05-09										60	ng/L
	TXM	WA157	CAN	-82.7717	42.1003	2013-05-14										61.5	ng/L
	TXM	WA158	CAN	-82.7717	42.1003	2013-05-14										58	ng/L
	TXM	WA159	CAN	-82.7717	42.1003	2013-05-21										269.5	ng/L
	TXM	WA160	CAN	-82.7717	42.1003	2013-05-21										740	ng/L
	TXM	WA161	CAN	-82.7717	42.1003	2013-06-03										127	ng/L
	TXM	WA162	CAN	-82.7717	42.1003	2013-06-03										58.5	ng/L
	TXM	WA163	CAN	-82.7717	42.1003	2013-06-11										261	ng/L
	TXM	WA164	CAN	-82.7717	42.1003	2013-06-17										190	ng/L
	TXM	WA165	CAN	-82.7717	42.1003	2013-06-17										0	ng/L
	TXM	WA166	CAN	-82.7717	42.1003	2013-06-25										378.5	ng/L
	TXM	WA167	CAN	-82.7717	42.1003	2013-06-25										129	ng/L
	TXM	WA168	CAN	-82.7918	42.0902	2013-04-30										198.5	ng/L
	TXM	WA169	CAN	-82.7918	42.0902	2013-04-30										0	ng/L
	TXM	WA170	CAN	-82.7918	42.0902	2013-05-14										0	ng/L
	TXM	WA171	CAN	-82.7918	42.0902	2013-05-21										22.9	ng/L
	TXM	WA172	CAN	-82.7918	42.0902	2013-05-29										575	ng/L
	TXM	WA173	CAN	-82.7918	42.0902	2013-06-03										0	ng/L
	TXM	WA174	CAN	-82.7918	42.0902	2013-06-11										1760	ng/L
	TXM	WA175	CAN	-82.7918	42.0902	2013-06-17										104.5	ng/L
	TXM	WA176	CAN	-82.5961	42.1935	2013-05-01										0	ng/L
	TXM	WA177	CAN	-82.5961	42.1935	2013-05-01										0	ng/L
	TXM	WA178	CAN	-82.5961	42.1935	2013-05-01										0	ng/L
	TXM	WA179	CAN	-82.5961	42.1935	2013-05-15										0	ng/L
	TXM	WA180	CAN	-82.5961	42.1935	2013-05-21										0	ng/L
	TXM	WA182	CAN	-82.6241	42.1986	2013-05-01										0	ng/L
	TXM	WA183	CAN	-82.6241	42.1986	2013-05-15										0	ng/L
	TXM	WA185	CAN	-82.6241	42.1986	2013-05-15										0	ng/L
	TXM	WA188	CAN	-82.6241	42.1986	2013-05-27										48.45	ng/L
	TXM	WA189	CAN	-82.6241	42.1986	2013-06-03										0	ng/L
	TXM	WA190	CAN	-82.6241	42.1986	2013-06-11										1770	ng/L
	TXM	WA191	CAN	-82.6241	42.1986	2013-06-11										525	ng/L
	TXM	WA192	CAN	-82.6241	42.1986	2013-06-11										0	ng/L
	TXM	WA193	CAN	-82.6241	42.1986	2013-06-17										122	ng/L
	TXM	WA194	CAN	-82.6241	42.1986	2013-06-17										141	ng/L
	TXM	WA195	CAN	-82.6241	42.1986	2013-06-25										0	ng/L
	TXM	WA196	CAN	-82.6241	42.1986	2013-06-25										308	ng/L
	TXM	WA197	CAN	-82.6241	42.1986	2013-05-02										0	ng/L
	TXM	WA198	CAN	-82.6241	42.1986	2013-05-23										0	ng/L
	TXM	WA199	CAN	-82.6241	42.1986	2013-05-29										331	ng/L
	TXM	WA200	CAN	-82.6241	42.1986	2013-06-21										37.65	ng/L
	TXM	WA201	CAN	-82.6241	42.1986	2013-05-02										0	ng/L
	TXM	WA202	CAN	-82.6241	42.1986	2013-05-13										0	ng/L
	TXM	WA203	CAN	-82.6241	42.1986	2013-05-23										0	ng/L
	TXM	WA205	CAN	-82.6241	42.1986	2013-05-23										0	ng/L
	TXM	WA206	CAN	-82.6241	42.1986	2013-05-29										2450	ng/L
	TXM	WA207	CAN	-82.6241	42.1986	2013-06-06										0	ng/L
[truncated: 6,367 more rows]

## Sheet: Table S1(2)-Location
Reference	longitude	Latitude
Changing Patterns in Water Toxicity Associated with Current Use Pesticides in Three California Agriculture Regions	-121.684	36.6863
	-121.523	36.5616
	-120.524	34.9025
	-120.59	35.0191
	-113.382	37.1778
	-85.7683	41.4698
	-121.719	36.7197
	-115.621	33.2122
	-115.501	32.863
	-115.479	33.0505
	-115.668	33.1059
	-115.715	32.8265
	-115.637	33.1011
	-115.338	32.7415
	-115.63	33.2123
Consequences of IMI treatments for hemlock woolly adelgid on stream water quality in the southern Appalachians	-83.0341	40.2546
	-83.2072	35.7448
	-82.1558	36.026
	-83.3163	35.5922
	-83.3955	35.7725
	-83.3354	35.7604
	-83.233	35.5499
	-95.5079	30.1633
	-93.2659	36.0527
Detection and analysis of neonicotinoids in river waters-Development of a passive sampler for three commonly used insecticides	150.815	-33.8016
	150.628	-33.8545
	150.698	-33.6124
	150.115	-33.9743
	149.126	-35.9715
	150.719	-33.8692
	150.709	-33.8817
Detections of the Neonicotinoid Insecticide IMI in Surface Waters of Three Agricultural Regions of California, USA,2010-2011	-115.596	33.1992
	-115.405	32.9307
	-115.337	32.7555
	-115.487	33.0445
	-115.651	32.8689
	-115.606	32.9132
	-115.415	32.8617
	-115.478	33.0518
	-115.665	33.1328
	-121.619	36.6612
	-121.781	36.7319
	-121.754	36.7596
	-121.562	36.6092
	-121.577	36.6436
	-121.529	36.5586
	-121.79	36.7908
	-121.701	36.6471
	-121.734	36.6988
	-121.789	36.7716
	-120.587	35.0164
	-120.573	34.9415
	-120.484	34.9549
	-120.632	34.9576
Ecological and landscape drivers of neonicotinoid insecticide detections and concentrations in Canada's Prairie wetlands	-105.814	54.9626
Ecological risk assessment of the increasing use of the neonicotinoid insecticides along the east coast of China	124.39	40.12
	122.07	41.18
	118.76	39.74
	118.07	37.35
	120.73	32.05
	121.51	31.21
	120.27	30.29
	120.77	28
	119.46	25.98
	118.56	24.94
	117.76	24.48
	116.65	23.65
	113.87	23.11
	112.83	23.16
	112.47	23.03
	110.38	20.02
Evaluation of river pollution of neonicotinoids in Osaka City(Japan) by LC/MS with dopant-assisted photoionisationt	135.536	34.756
	135.529	34.7342
	135.446	34.7105
	135.416	34.6893
	135.419	34.6831
	135.583	34.7003
	135.579	34.6968
	135.556	34.6879
	135.554	34.6872
	135.54	34.6892
	135.541	34.6879
	135.54	34.6618
	135.522	34.7
	135.521	34.6919
	135.513	34.6917
	135.51	34.6908
	135.511	34.6823
	135.497	34.669
	135.458	34.6777
	135.429	34.6578
	135.462	34.6567
	135.475	34.6313
	135.458	34.6331
	135.448	34.6276
	135.459	34.6163
	135.393	34.6414
Extraction of neonicotinoid insecticides from environmental water samples with magnetic graphene nanoparticles as adsorbent followed by determination with HPLC	114.643	39.0953
	121.559	36.8509
	115.768	39.045
Factors influencing the occurrence and distribution of neonicotinoid insecticides in surface waters of southern Ontario, Canada	-79.3698	43.1618
	-79.103	43.258
	-79.1204	43.2558
	-80.5381	42.6434
	-79.546	44.1127
	-79.8062	43.3132
	-79.7912	44.13
	-82.5019	42.0359
	-80.9899	43.0898
	-79.8225	44.2484
	-81.6179	45.0672
	-82.5609	42.0213
	-81.956	42.7169
	-82.0889	42.4934
	-79.394	43.1927
First national-scale reconnaissance of neonicotinoid insecticides in streams across the USA	-83.5326	39.7279
	-90.5652	43.1854
	-80.3332	25.2414
	-88.1543	41.7005
	-97.2677	37.7412
	-122.251	45.234
	-75.2829	40.4033
	-82.21	34.7036
	-76.5064	42.4528
	-83.9077	38.339
	-93.7163	41.6951
	-78.6096	38.618
	-80.4169	26.4234
	-85.3326	38.2054
	-74.152	40.9885
	-75.7375	40.6647
	-80.6833	41.0871
	-115.668	33.1059
	-99.2544	40.5941
	-92.1564	35.9534
	-74.6597	39.6919
	-68.4472	17.4892
	-65.3913	18.1847
	-97.1019	32.4305
	-117.026	43.8274
	-117.998	33.6938
	-84.5289	33.897
	-93.6502	42.43
	-92.5305	44.1027
	-104.571	39.4847
	-92.893	45.5401
	-113.711	48.7958
	-121.532	38.5531
	-121.453	36.4554
	-94.7121	29.7431
	-75.294	42.1949
	-111.758	34.5424
	-122.813	45.0895
	-86.6455	32.7735
	-76.8156	40.9684
	-77.8173	39.5616
	-80.0641	42.118
Inputs,source apportionment,and transboundary transport of pesticides and other polar organic contaminants along the lower Red River, Manitoba,Canada	-97.2153	49.0084
	-97.1377	49.7547
	-97.0975	49.9515
	-96.8648	50.1427
	-96.8516	50.2783
	-97.4098	49.8689
Neonicotinoid insecticide residues in subsurface drainage and open ditch water around maize fields in southwestern Ontario Neonicotinoid Insecticide Residues in Surface Water and Soil Associated with Commercial Maize (Corn) Fields in Southwestern Ontario	-82.3023	42.941
	-81.0876	42.7459
	-82.7918	42.0902
	-81.4992	43.1001
	-82.375	42.9094
	-82.3876	42.905
	-82.5961	42.1935
	-81.9267	42.8277
	-81.9936	42.44
	-81.9985	42.435
	-82.7717	42.1003
	-81.7665	42.7784
	-82.6241	42.1986
	-81.7816	42.7838
	-81.4815	43.1027
	-81.9245	42.8229
	-81.1138	42.7315
Neonicotinoid insecticides in surface water from the central Yangtze River, China	111.887	30.4119
	112.223	30.3179
	112.402	30.0303
	112.396	29.7656
	112.633	29.6986
	112.855	29.7918
	112.923	29.7003
	112.988	29.497
	113.142	29.4381
	113.096	29.3991
	113.071	29.2596
	113.275	29.5947
	113.464	29.8042
	113.611	29.8915
	113.863	30.0016
	113.876	30.2388
	114.099	30.3413
	114.249	30.5115
	114.279	30.5644
	114.319	30.6142
Neonicotinoid pesticides in drinking water in agricultural regions of southern Ontario,Canada	-81.2421	42.6463
	-83.3376	42.1845
	-82.4891	42.3171
	-80.347	43.3348
Occurrence of Neonicotinoid Insecticides in Finished Drinking Water and Fate during Drinking Water Treatment	-91.555	41.663
	-91.5325	41.6555
Neonicotinoids in raw, finished, and tap water from Wuhan, Central China: Assessment of human exposure potential	114.15	30.3671
	114.223	30.4727
	114.248	30.4717
	114.299	30.5474
	114.34418	30.613
	114.372	30.6742
	114.438	30.6652
	114.15	30.5986
	114.199	30.5852
	114.231	30.5797
Occurrence and distribution of neonicotinoid insecticides in surfacewater and sediment of the Guangzhou section of the Pearl River,South China	113.124	23.916
	113.141	23.612
	113.163	23.655
	113.184	23.635
	113.226	23.634
	113.145	23.455
	113.162	23.346
	113.174	23.313
	113.242	23.512
	113.124	23.226
	113.158	23.256
	113.182	23.25
	113.242	23.21
	113.253	23.53
Occurrence of Neonicotinoid Residues in Danube River and Tributaries	21.3889	44.7924
	22.553	44.6687
	22.9044	43.9641
	23.455	44.569
	23.7903	44.2551
	23.2886	43.8569
	23.9418	43.7531
	24.3513	44.3916
	24.7077	43.8116
	24.7344	43.7063
	24.8157	43.7174
	25.68	44.4792
	25.9805	43.8771
	26.646	44.1106
	26.646	44.0644
	27.3356	44.1377
Occurrence, distribution and seasonal variation of five neonicotinoid insecticides in surface water and sediment of the Pearl Rivers, South China】	114.925	23.8837
	114.657	23.7303
	114.661	23.5865
	114.613	23.168
	114.245	23.1273
	113.873	23.1071
	113.65	23.11
	113.528	23.0467
	113.586	22.8967
	113.487	24.9134
	113.734	24.9121
	113.519	24.7245
	113.528	24.3974
	113.425	24.1718
	113.373	24.0737
	113.306	24.0248
	113.11	23.6999
	112.9	23.414
	112.893	23.4474
	112.871	23.2828
	112.748	23.3541
	112.825	23.2425
	112.858	23.16
	112.995	23.0334
	113.085	22.904
	113.214	22.904
	113.387	22.9088
	113.563	22.8736
	113.56	22.7521
	113.223	23.1546
	113.347	23.1158
	113.371	23.0382
	113.48	23.085
	112.371	23.1491
	112.51	23.0452
	112.808	23.1045
	112.919	22.9007
	113.086	22.7728
	113.308	22.7422
	113.392	22.6894
	113.446	22.7427
	113.584	22.5879
	113.174	22.6074
	113.267	22.4018
	113.33	22.4891
	113.389	22.2504
	113.318	22.7414
	113.387	22.6869
	113.307	22.4595
Pesticides, Including Neonicotinoids, in Drained Wetlands of Iowa’s Prairie Pothole Region	-115.255	48.4682
Reduction of neonicotinoid insecticide residues in Prairie wetlands by common wetland plants Snowmelt transport of neonicotinoid insecticides to Canadian Prairie wetlands（两篇文献）	-106.017	52.5167
Widespread occurrence of neonicotinoid insecticides in streams in a high corn and soybean producing region, USA	-95.9571	41.3498
	-94.9214	41.3301
	-91.8357	41.6027
	-90.7893	42.1083
	-90.2886	41.7642
	-97.4946	42.2688
	-91.1875	41.201
	-95.2563	43.2358
Widespread Use and Frequent Detection of Neonicotinoid Insecticides in Wetlands of Canada's Prairie Pothole Region[Water]	-106.9928	52.182
	-105.8983	51.999
	-105.483	51.865
	-105.1320	52.2161
Year-round presence of neonicotinoid insecticides in tributaries to the Great Lakes,USA	-90.824	46.4395
	-81.6294	41.3934
	-77.6421	43.1217
	-77.6421	43.1217
	-77.6422	43.1217
	-86.0032	43.0063
	-87.4765	41.6336
	-90.1095	44.2298
	-84.0898	41.4097
	-84.0898	41.4097
	-83.1176	42.2792
	-83.9656	43.3879
	-86.2661	41.8501
	-77.6421	43.1217
	-77.6421	43.1217
	-83.5312	41.2447
	-83.5036	41.2403
	-83.4456	41.2835
	-83.3821	41.3342
	-83.3157	41.3812
	-83.3235	41.384
	-83.2908	41.4101
	-83.2838	41.412
A nationwide study of occurrence and exposure assessment of neonicotinoid insecticides and their metabolites in drinking water of China	109.165	21.6667
	110.148	23.6111
	110.451	23.8889
	110.456	24.3056
	110.093	24.0278
	110.16	24.5833
	109.798	24.375
	109.733	23.9583
	111.967	25.2083
	111.97	25.4861
	111.607	25.2083
	111.671	25.5556
	111.685	26.7361
	112.523	26.5972
	111.987	26.875
	113.654	20.9028
	112.879	21.25
	112.641	21.4583
	113.965	21.8056
	113.665	21.8056
	113.487	21.9444
	113.969	22.1528
	114.271	22.3611
	114.216	22.7778
	113.914	22.5694
	113.372	22.4306
	112.713	22.4306
	119.402	30.1389
	119.042	30.1389
	119.465	30.4167
	114.12	24.7917
	115.343	26.7361
	114.572	27.4306
	116.791	27.4306
	116.555	27.7778
	115.72	28.1944
	118.616	29.5833
	118.44	29.9306
	118.008	28.9583
	116.9	26.5278
	116.747	23.8194
	117.051	24.0972
	116.692	24.2361
	117.534	24.375
	117.236	24.5139
	117.781	25
	110.252	17.2222
	110.137	17.7083
	109.894	17.4306
	109.652	17.2222
	110.382	18.125
	109.903	18.125
	109.846	18.4028
	109.483	18.125
	109.18	17.9167
	110.331	18.8194
	118.387	30.4861
	118.028	30.625
	118.155	31.1806
	118.516	31.25
	117.252	30.9028
	117.224	33.5417
	116.98	33.1944
	116.745	33.6111
	117.179	29.7917
	116.819	29.7917
	116.516	29.5139
	115.745	30.2778
	114.51	32.2917
	106.687	25
	106.697	25.8333
	106.999	26.0417
	107.244	26.4583
	106.884	26.4583
	106.779	27.7083
	106.123	27.9861
	108.357	29.2361
	113.511	28.9583
	114.409	28.8889
	114.111	29.0278
	112.682	29.8611
	112.325	30.0694
	112.149	30.4167
	110.752	28.9583
	110.757	29.375
	110.521	29.6528
	110.456	29.2361
	102.68	25.9722
	103.048	26.5972
	102.688	26.5972
	102.384	26.25
	105.161	27.7778
	105.78	29.375
	104.644	29.7222
	113.123	31.5972
	113.068	32.0139
	112.766	31.875
	112.711	32.2917
	112.3	32.9861
	112.111	32.2917
	111.754	32.5
	102.171	23.5417
	104.018	22.5
	104.202	22.8472
	103.666	23.125
	108.514	32.3611
	108.887	33.4722
	92.1523	28.1944
	93.2434	29.1667
	94.4336	28.4028
	103.665	33.0556
	104.864	33.0556
	105.227	33.2639
	104.69	33.5417
	103.832	37.0139
	102.891	33.5417
	103.255	33.8889
	103.018	34.1667
	102.724	34.5833
	98.2959	35.4167
	90.9287	41.1806
	90.2724	41.4583
	94.1912	43.1944
	115.082	35
	114.304	35.0694
	114.488	35.4167
	114.551	35.6944
	114.188	35.4167
	114.016	36.1111
	114.204	36.7361
	113.36	36.3889
	113.736	37.7083
	114.874	37.6389
	114.998	37.9167
	114.166	38.6111
	111.318	36.1111
	112.18	37.9861
	111.701	38.0556
	111.945	38.4028
	111.525	38.4028
	107.209	33.5417
	107.755	34.0972
	106.972	33.75
	106.881	36.1806
	106.399	36.0417
	106.584	36.4583
	106.65	36.9444
	109.503	39.7917
	110.761	39.7222
	118.911	39.1667
	118.551	39.1667
	118.795	39.5139
	117.246	40.3472
	117.488	40.5556
	117.98	41.5972
	119.647	40.5556
	119.653	41.0417
	119.29	40.7639
	119.056	41.3194
	118.223	41.875
	120.334	42.8472
	120.461	43.4028
	120.763	43.6111
	120.526	43.8194
	120.046	43.8194
	121.425	43.8194
	121.787	44.0278
	121.431	44.3056
	121.742	45.2083
	122.045	45.4861
	121.565	45.4861
	120.669	45.7639
	118.165	47.0139
	117.204	51.875
Contamination of neonicotinoid insecticides in soil-water-sediment systems of the urban and rural areas in a rapidly developing region: Guangzhou, South China	113.252	23.1082
	113.28	23.1191
	113.259	23.1058
	113.268	23.1092
	113.281	23.1092
	113.295	23.1085
	113.298	23.1063
	113.309	23.1087
	113.325	23.109
	113.34	23.109
	113.341	23.1108
	113.355	23.1087
	113.369	23.109
	113.383	23.1092
	113.397	23.1087
	113.366	23.1023
	113.265	23.0949
	113.276	23.0978
	113.279	23.0952
	113.294	23.0952
	113.308	23.0957
	113.323	23.0952
	113.338	23.0949
	113.352	23.0952
	113.369	23.095
	113.382	23.094
	113.395	23.094
	113.398	23.0918
	113.409	23.0934
	113.266	23.0801
	113.281	23.0796
	113.296	23.0796
	113.31	23.0801
	113.315	23.0759
	113.325	23.0793
	113.339	23.0791
	113.354	23.0804
	113.366	23.0823
	113.368	23.0801
	113.383	23.0807
	113.28	23.069
	113.295	23.0655
	113.303	23.062
	113.31	23.0655
	113.324	23.066
	113.338	23.0727
	113.34	23.0658
	113.354	23.0658
	113.354	23.0511
	113.369	23.0514
	113.369	23.0519
	113.369	23.0652
	113.53	22.7473
	113.539	22.7375
	113.55	22.7277
	113.559	22.718
	113.57	22.7088
	113.579	22.699
	113.589	22.6902
	113.599	22.6811
	113.609	22.671
	113.619	22.6628
	113.629	22.653
	113.522	22.7359
	113.534	22.7287
	113.542	22.7176
	113.552	22.7088
	113.561	22.6994
	113.572	22.6899
	113.581	22.6808
	113.591	22.6716
	113.602	22.6625
	113.611	22.6533
	113.621	22.6438
	113.632	22.6344
	113.641	22.6259
	113.497	22.7366
	113.506	22.7277
	113.516	22.7189
	113.527	22.71
	113.537	22.7012
	113.546	22.692
	113.557	22.6828
	113.567	22.6739
	113.577	22.6641
	113.587	22.6556
	113.596	22.6461
	113.608	22.6366
	113.617	22.6267
	113.627	22.6179
	113.64	22.6055
	113.648	22.5995
	113.487	22.7297
	113.497	22.7208
	113.507	22.7107
	113.517	22.7018
	113.526	22.6929
	113.536	22.6834
	113.547	22.6739
	113.556	22.6654
	113.567	22.6568
	113.576	22.6476
	113.587	22.6378
	113.596	22.6286
	113.607	22.6188
	113.616	22.6099
	113.632	22.5973
	113.637	22.5915
	113.47	22.7281
	113.479	22.7186
	113.489	22.7088
	113.496	22.6983
	113.598	22.6052
	113.624	22.5903
	113.63	22.5795
Temporal pattern in levels of the neonicotinoid insecticide, imidacloprid, in an urban stream	-116.985888	32.8315
	-116.996588	32.8386
Simultaneous determination of neonicotinoids and fipronil and its metabolites in environmental water from coastal bay using disk-based solid-phase extraction and high-performance liquid chromatographyetandem mass spectrometry	120.347	36.1731
	120.212	36.1596
	120.248	36.1625
	120.283	36.1635
	120.322	36.1558
	120.174	36.1365
	120.205	36.1346
	120.247	36.1356
	120.293	36.1356
	120.211	36.1067
	120.249	36.101
	120.289	36.1058
	120.207	36.076
	120.242	36.0346
	120.29	36.0337
	120.344	36.1077
	120.373	36.1452
	120.347	36.2519
	120.327	36.2625
	120.105	36.1933
	120.086	36.1596
	120.341	36.0942
Magnetic solid phase extraction based on nanostructured magnetic porous porphyrin organic polymer for simultaneous extraction and preconcentration of neonicotinoid insecticides from surface water	27.9491	-25.52
Factors Influencing Neonicotinoid Insecticide Concentrations in Floodplain Wetland Sediments across Missouri	-95.2501040722402	40.0065
	-90.7012	39.1159
	-90.1772	38.8028
	-90.1004	37.0455
	-94.3343	38.0186
	-95.0464	40.1419
	-93.5311	38.9422
	-94.0968	38.008
	-89.3173	36.723
	-91.1954	39.5457
	113.195	23.2122
	113.212	23.2047
	113.224	23.1422
	113.303	23.1192
	113.331	23.1156
Occurrence and risk of neonicotinoid insecticides in surface water in a rapidly developing region: Application of polar organic chemical integrative samplers	113.362	23.1125
	113.366	23.1131
	113.373	23.1131
	113.38	23.1144
	113.393	23.1144
	113.412	23.1094
	113.42	23.1061
	113.453	23.095
	113.461	23.0978
	113.479	23.0789
	113.505	23.0706
	113.469	23.0844
	113.413	23.0978
	113.366	23.115
	113.35	23.1106
	113.338	23.1114
	113.303	23.1192
	113.331	23.1156
	113.342	23.1131
	120.13402	30.1654
	120.13056	30.1879
	120.15644	30.2019
	120.16794	30.2039
	120.18518	30.2124
	120.20876	30.2244
Neonicotinoid insecticides in the drinking water system e Fate, transportation, and their contributions to the overall dietary risks	120.22888	30.2453
	120.24038	30.2598
	119.99719	30.4148
	119.99345	30.415
	119.99201	30.4112
	119.99072	30.4048
	119.98544	30.402
	119.98105	30.403
	119.97775	30.402
	119.97502	30.4002
	120.11961	30.1604
	120.20814	30.2383
	120.23747	30.2802
	120.13312	30.3102
	120.31364	30.3551
	120.16201	30.1519
	120.17179	30.1899
	120.21606	30.1654
	120.22525	30.1954
	120.23215	30.2254
	120.25055	30.2034
	120.24883	30.2379
	120.16604	30.2274
	120.17064	30.2563
	120.17064	30.2678
	120.18961	30.2538
	120.19018	30.2349
	120.09877	30.093
	120.10740	30.124
	120.06140	30.13
	120.03151	30.1549
	120.10682	30.1604
	120.07693	30.1939
	120.03668	30.2169
	120.07175	30.2488
	120.06715	30.2733
	120.14822	30.2658
	120.12234	30.2918
	120.10165	30.3302
	120.06428	30.3346
	120.07865	30.3606
	120.16661	30.3037
	120.14247	30.3317
	120.16316	30.3496
	120.15511	30.3715
	120.18616	30.3875
	120.14477	30.3985
	120.17466	30.4373
	120.07233	30.4034
	120.06543	30.3666
	120.05048	30.3376
	120.22870	30.2703
	120.23043	30.2863
	120.24883	30.2962
	120.26550	30.2997
	120.28792	30.3097
	120.35863	30.2808
	120.37933	30.3007
	120.40463	30.3307
	120.36323	30.2987
	120.37358	30.3117
	120.32874	30.3067
	120.40693	30.3706
	120.40693	30.4015
	120.36783	30.3865
	120.30689	30.3626
	120.33449	30.3466
	120.22870	30.3406
	120.18041	30.3187
	120.20800	30.3127
	120.18271	30.3516
	120.20111	30.3995
	-88.14783	18.2914
	-88.18060	18.2607
	-88.20992	18.2282
	-88.21222	18.2403
	-88.21222	18.1975
	-88.21107	18.1695
A survey and risk assessment of neonicotinoids in water, soil and sediments of Belize	-88.28983	18.2843
	-88.28580	18.281
	-88.27546	18.2793
	-88.27661	18.2717
	-88.31053	18.2013
	-88.31053	18.187
	-88.28638	18.1848
	-88.30420	18.1651
	-88.36974	18.2629
	-88.37377	18.0958
	-88.37204	18.0782
	-88.38124	18.0567
	-88.43298	18.0386
	-88.39964	18.0331
	-88.35250	18.0952
	-88.33927	18.0683
	-88.26856	18.0331
	-88.22371	18.0551
	-88.23521	18.0353
	-88.27431	18.0243
	-88.27316	18.999
	-74.64463	44.758
	-82.99777	45.345
	-94.35000	35.1167
	-73.75	45.5833
	-71.03333	48.4167
	-73.05083	45.6167
Evaluation of on-line concentration coupled to liquid chromatography tandem mass spectrometry for the quantification of neonicotinoids and fipronil in surface water and tap water	-75.42	45.25
	125.54179	6.46422
	-72.9583	45.6194
	105.85	21.0333
	105.827	21.0554
	105.832	20.9687
High-Throughput Quantitation of Neonicotinoids in Lyophilized Surface Water by LC-APCI-MS/MS	105.815	20.9676
Residues of neonicotinoids in soil, water and people's hair: A case study from three agricultural regions of the Philippines	105.814	21.0013
Neonicotinoid-Contaminated Puddles of Water Represent a Risk of Intoxication for Honey Bees	105.87	21.0468
Neonicotinoids, fipronil, chlorpyrifos, carbendazim, chlorotriazines, chlorophenoxy herbicides, bentazon, and selected pesticide transformation products in surface water and drinking water from northern Vietnam	105.856	21.0122
	105.846	21.0186
	105.839	21.0588
	106.05	21.1833
	106.067	20.65
	107.333	21.25
	105.217	21.8167
	121.099	31.7447
	121.213	31.6626
	121.322	31.5697
	121.442	31.153
	121.556	31.4037
	121.686	31.3406
Research on the distribution of neonicotinoid and fipronil pollution in the Yangtze River by high-performance liquid chromatography	121.788	31.2427
	121.889	31.1514
	122.004	31.0766
	122.127	31.0065
	122.249	30.9204
	122.502	30.8345
	122.751	30.7466
	123.001	30.665
	123.251	30.582
	123.002	31.0003
	123.001	31.3343
	122.999	31.6673
	122.258	31.2203
	122.5	31.504

## Sheet: Table S1(3)-NEOs concentration
	ACE (ng/L)	CLO (ng/L)	DIN (ng/L)	IMI (ng/L)	IMZ (ng/L)	NIT (ng/L)	THI (ng/L)	TXM (ng/L)
	0.0025	0.001	0.11	0.004	0.002	2	0.003	0.002
	0.008	0.053	0.11	0.01	0.01	5.05	0.003	0.02
	0.01	0.07	0.23	0.01	0.01	5.22	0.01	0.02
	0.04	0.1	0.31	0.011	0.02	6.18	0.011	0.04
	0.05	0.1	0.31	0.02	0.02	6.52	0.02	0.04
	0.1	0.1	0.34	0.03	15.23	6.74	0.02	0.06
	0.1	0.1	0.36	0.03	15.34	6.93	0.02	0.06
	0.1	0.1	0.36	0.04	15.35	7.52	0.02	0.06
	0.11	0.1	0.37	0.06	15.4	8.15	0.02	0.06
	0.12	0.1	0.38	0.068	15.68	11.21	0.02	0.08
	0.13	0.12	0.47	0.07	15.78	11.5	0.02	0.08
	0.16	0.12	0.59	0.09	15.89	12.64	0.02	0.116
	0.16	0.12	0.64	0.1	16.11	13.03	0.02	0.12
	0.19	0.12	0.64	0.1	16.58	18.06	0.02	0.12
	0.19	0.16	0.7	0.11	16.75	18.71	0.02	0.15
	0.21	0.18	0.7	0.12	17.3	30.21	0.02	0.16
	0.25	0.18	0.7	0.16	17.87	41.75	0.02	0.16
	0.25	0.18	0.79	0.16	21.07	42.32	0.02	0.18
	0.26	0.18	0.8	0.18	21.14	55.44	0.02	0.18
	0.26	0.2	0.9	0.2	21.27	92.48	0.02	0.2
	0.26	0.2	1.08	0.24	21.57	95.62	0.02	0.2
	0.27	0.2	1.14	0.24	22.86	110.03	0.02	0.2
	0.29	0.2	1.19	0.25	23.94	120.16	0.02	0.2
	0.3	0.22	1.47	0.25	24.68	136.31	0.02	0.21
	0.3	0.22	1.49	0.26	27.54	152.54	0.02	0.22
	0.3	0.22	1.8	0.26	32.44	173.18	0.02	0.26
	0.31	0.22	1.85	0.28	32.57	291.51	0.02	0.26
	0.33	0.22	2	0.28	32.65	400.31	0.02	0.28
	0.34	0.22	2.03	0.29	34.27	672.9	0.02	0.28
	0.38	0.24	2.1	0.29	35.04		0.02	0.29
	0.4	0.24	2.27	0.29	38.61		0.02	0.3
	0.4	0.24	2.4	0.29	39.08		0.02	0.33
	0.4	0.25	2.47	0.31	41.04		0.02	0.33
	0.4	0.25	2.54	0.33	47.35		0.02	0.34
	0.42	0.25	2.54	0.33	47.45		0.02	0.35
	0.42	0.26	2.68	0.34	68.23		0.02	0.36
	0.48	0.26	2.7	0.36	81.92		0.02	0.36
	0.49	0.26	3	0.39			0.02	0.36
	0.5	0.26	3.7	0.4			0.02	0.37
	0.57	0.26	3.7	0.4			0.02	0.37
	0.6	0.27	4	0.42			0.02	0.38
	0.6	0.27	4.66	0.42			0.02	0.38
	0.6	0.28	4.9	0.43			0.02	0.39
	0.61	0.28	5.4	0.48			0.02	0.3935
	0.62	0.29	5.8	0.49			0.02	0.4
	0.63	0.3	6.13	0.5			0.02	0.42
	0.65	0.31	6.15	0.51			0.02	0.42
	0.7	0.32	6.3	0.54			0.02	0.42
	0.7	0.34	6.4	0.58			0.02	0.44
	0.77	0.37	6.45	0.62			0.02	0.46
	0.8	0.38	6.5	0.63			0.02	0.47
	0.82	0.38	6.6	0.65			0.02	0.48
	0.82	0.38	6.7	0.7			0.02	0.49
	0.88	0.38	6.7	0.7			0.02	0.49
	0.94	0.39	6.8	0.74			0.03	0.5
	0.95	0.4	7.02	0.76			0.03	0.5
	0.96	0.4	7.48	0.82			0.03	0.51
	0.98	0.41	7.5	0.84			0.04	0.52
	1	0.41	7.5	0.84			0.04	0.54
	1.1	0.42	8.9	0.86			0.04	0.54
	1.1	0.44	9.4	0.86			0.04	0.55
	1.1	0.45	10	0.9			0.04	0.58
	1.12	0.46	10.44	0.94			0.04	0.58
	1.14	0.46	10.7	0.95			0.04	0.58
	1.18	0.47	10.72	0.98			0.04	0.59
	1.24	0.48	10.99	0.98			0.04	0.6
	1.24	0.48	11	1			0.04	0.61
	1.28	0.5	11.4	1			0.04	0.62
	1.28	0.52	12	1			0.04	0.62
	1.31	0.52	12.22	1			0.04	0.64
	1.32	0.53	12.5	1			0.04	0.64
	1.35	0.53	13.8	1.02			0.04	0.65
	1.35	0.54	16	1.04			0.04	0.66
	1.36	0.54	16	1.04			0.04	0.66
	1.4	0.55	16.42	1.06			0.04	0.67
	1.4	0.55	18	1.08			0.04	0.68
	1.4	0.6	18	1.08			0.04	0.7
	1.45	0.6	18.167	1.11			0.04	0.7
	1.45	0.6	19	1.12			0.04	0.7
	1.46	0.6	20	1.12			0.04	0.7
	1.48	0.6	20	1.14			0.04	0.7
	1.48	0.61	21	1.16			0.04	0.7
	1.48	0.62	21	1.18			0.04	0.7
	1.52	0.63	21	1.2			0.04	0.72
	1.54	0.64	21	1.22			0.04	0.72
	1.55	0.64	21	1.22			0.04	0.72
	1.64	0.65	21	1.25			0.04	0.72
	1.65	0.66	22	1.26			0.04	0.73
	1.65	0.67	23.33	1.28			0.04	0.77
	1.66	0.68	24.08	1.29			0.04	0.77
	1.66	0.69	25.167	1.29			0.04	0.78
	1.68	0.7	25.99	1.3			0.04	0.8
	1.76	0.7	26.26	1.3			0.04	0.8
	1.78	0.7	27	1.3			0.04	0.8
	1.8	0.7	27.44	1.3			0.04	0.8
	1.82	0.72	28	1.33			0.04	0.8
	1.82	0.72	30	1.34			0.05	0.8
	1.82	0.72	30	1.36			0.05	0.8
	1.84	0.74	31	1.38			0.06	0.82
	1.98	0.74	31	1.4			0.06	0.82
	1.98	0.76	34	1.4			0.06	0.82
	2	0.78	35	1.42			0.06	0.84
	2	0.78	36	1.44			0.06	0.85
	2.02	0.78	38	1.44			0.06	0.86
	2.04	0.78	38	1.45			0.06	0.89
	2.06	0.78	39.75	1.45			0.06	0.9
	2.08	0.8	41.167	1.5			0.06	0.9
	2.14	0.8	44.35	1.5			0.06	0.92
	2.16	0.8	45	1.53			0.06	0.98
	2.16	0.8	53	1.53			0.06	1
	2.18	0.8	54	1.55			0.06	1
	2.2	0.8	63	1.6			0.06	1
	2.22	0.83	63	1.64			0.06	1
	2.27	0.86	73.77	1.69			0.06	1
	2.28	0.9	84.2	1.7			0.06	1.04
	2.3	0.9	100	1.8			0.06	1.04
	2.32	0.9	133.8	1.8			0.06	1.04
	2.34	0.92	166.93	1.8			0.06	1.04
	2.4	0.92	274.24	1.82			0.06	1.08
	2.4	0.92	392.56	1.86			0.06	1.09
	2.44	0.92	1022.2	1.93			0.08	1.09
	2.44	0.94	4.7	1.94			0.08	1.1
	2.44	0.94		1.96			0.08	1.13
	2.46	1		2			0.08	1.13
	2.48	1		2			0.09	1.14
	2.5	1		2			0.1	1.14
	2.5	1		2			0.1	1.16
	2.5	1		2.1			0.11	1.16
	2.5	1.02		2.1			0.12	1.17
	2.52	1.05		2.12			0.12	1.18
	2.52	1.08		2.13			0.12	1.19
	2.56	1.1		2.15			0.12	1.19
	2.6	1.1		2.2			0.13	1.2
	2.6	1.1		2.23			0.13	1.2
	2.62	1.1		2.24			0.14	1.22
	2.62	1.1		2.26			0.14	1.22
	2.62	1.18		2.3			0.15	1.28
	2.7	1.18		2.32			0.16	1.3
	2.7	1.2		2.33			0.16	1.3
	2.78	1.2		2.42			0.17	1.34
	2.8	1.2		2.46			0.17	1.34
	2.84	1.2		2.46			0.17	1.36
	2.9	1.2		2.48			0.17	1.4
	2.92	1.2		2.5			0.18	1.41
	2.94	1.2		2.5			0.18	1.42
	2.94	1.2		2.5			0.19	1.44
	2.96	1.2		2.5			0.2	1.46
	2.98	1.26		2.5			0.2	1.48
	2.98	1.29		2.53			0.2	1.5
	2.98	1.3		2.54			0.2	1.5
	3.02	1.3		2.56			0.2	1.5
	3.02281	1.3		2.6			0.21	1.5
	3.06	1.3		2.6			0.23	1.5
	3.06	1.31		2.6			0.23	1.5
	3.13	1.31		2.66			0.24	1.58
	3.14	1.4		2.7			0.25	1.58
	3.15	1.4		2.7			0.26	1.6
	3.16	1.4		2.78			0.26	1.6
	3.16	1.4		2.84			0.27	1.6
	3.16	1.4		2.9			0.27	1.6
	3.18	1.43		2.92			0.27	1.62
	3.18	1.5		2.92			0.28	1.67
	3.26	1.5		2.96			0.29	1.7
	3.28	1.52		3			0.3	1.7
	3.32	1.52		3			0.3	1.7
	3.32	1.55		3			0.32	1.71
	3.34	1.6		3			0.33	1.72
	3.38	1.6		3			0.33	1.74
	3.38	1.6		3.1			0.34	1.76
	3.42	1.6		3.11			0.34	1.76
	3.48	1.67		3.11			0.35	1.79
	3.5	1.7		3.18			0.36	1.8
	3.52	1.7		3.2			0.36	1.8
	3.56436	1.7		3.2			0.39	1.81
	3.58	1.7		3.2			0.4	1.84
	3.62	1.7		3.26			0.4	1.9
	3.63333	1.7		3.3			0.42	1.9
	3.65	1.8		3.38			0.42	1.9
	3.67	1.8		3.38			0.43	1.9
	3.72	1.8		3.4			0.43	1.9
	3.76	1.8		3.46			0.43	1.93
	3.84	1.84		3.5			0.436	1.94
	3.86	1.86		3.5			0.44	2
	3.86	1.9		3.5			0.45	2
	3.94	1.9		3.51			0.46	2
	3.95	1.9		3.54			0.46	2
	3.98	1.9		3.58			0.46	2
	4	1.9		3.6			0.46	2
	4.01	1.98		3.69			0.47	2.04
	4.04	2		3.7			0.47	2.04
	4.08	2		3.76			0.48	2.08
	4.13	2		3.76			0.48	2.1
	4.2	2		3.773			0.49	2.1
	4.2	2		3.86			0.49	2.1
	4.21	2		3.86			0.51	2.1
	4.23	2		3.95018			0.52	2.12
	4.34	2		3.96			0.57	2.19
	4.35	2.03		4			0.581	2.2
	4.36	2.1		4			0.585	2.2
	4.39	2.1		4			0.6	2.2
	4.42	2.1		4			0.6	2.2
	4.52	2.1		4.02			0.61	2.2
	4.54	2.1		4.08			0.62	2.2
	4.56	2.2		4.09			0.62	2.26
	4.58	2.2		4.1			0.63	2.3
	4.61	2.2		4.1			0.63	2.3
	4.67	2.2		4.145			0.65	2.3
	4.78	2.2		4.14737			0.65	2.3
	4.92	2.2		4.17			0.67	2.38
	5.04	2.22		4.18			0.706	2.4
	5.04076	2.3		4.24			0.71	2.4
	5.21	2.3		4.3			0.71	2.4
	5.24	2.3		4.32			0.72	2.4
	5.26	2.3		4.37692			0.73	2.4
	5.35	2.3		4.37942			0.73	2.46
	5.37	2.35		4.4			0.76	2.5
	5.41	2.4		4.4			0.77	2.5
	5.5	2.4		4.4			0.809	2.5
	5.56	2.4		4.44			0.81	2.5
	5.56	2.4		4.5			0.83	2.5
	5.67	2.4		4.56			0.832	2.5
	5.71	2.4		4.56			0.84	2.52
	5.8	2.4		4.58			0.84	2.54
	5.88	2.44		4.64			0.84	2.54
	5.88	2.44		4.68			0.85	2.58
	5.9	2.45		4.77488			0.89	2.58
	5.92	2.45588		4.8			0.9	2.6
	5.92	2.46		4.8			0.94	2.6
	6.02	2.47		4.815			1.03	2.6
	6.06	2.5		4.84			1.03	2.6
	6.15	2.5		4.9			1.04	2.6
	6.24	2.5		4.9			1.05	2.6
	6.28	2.5		4.91			1.08	2.6
	6.35	2.5		4.96856			1.08	2.61
	6.38	2.6		4.98			1.15	2.62
	6.52	2.6		5			1.27	2.65
	6.63	2.6		5			1.28	2.66
	6.7	2.6		5.05			1.29	2.69
	6.72	2.6		5.1			1.31	2.7
	6.78	2.6		5.1			1.32	2.7
	6.8	2.64		5.12			1.35	2.7
	6.81	2.64		5.14			1.37	2.7
	6.83	2.65		5.2			1.42	2.7
	6.85	2.7		5.22			1.43	2.7
	6.96	2.7		5.25			1.45	2.7
	7	2.7		5.27			1.45	2.7
	7.01	2.7		5.3			1.49	2.7
	7.07	2.76		5.3			1.53	2.78
	7.08	2.8		5.39			1.53	2.8
	7.11	2.8		5.39			1.54	2.8
	7.12	2.8		5.4			1.57	2.8
	7.37	2.8		5.42			1.63	2.8
	7.46	2.8		5.43			1.67	2.8
	7.57	2.8		5.48			1.77	2.8
	7.62	2.8		5.49			1.77	2.8
	7.71	2.8		5.52			1.85	2.8
	7.73	2.8		5.53			2.01	2.8
	7.92	2.83		5.534			2.03	2.81
	7.93	2.86		5.56			2.08	2.84
	7.97	2.9		5.6			2.1	2.84
	8.05	2.9		5.63			2.19	2.85
	8.27	2.9		5.64			2.28	2.9
	8.29	2.9		5.65			2.71	2.9
	8.59	2.9		5.658			2.81	2.9
	8.67	2.9		5.68			2.97	2.9
	8.94	2.9		5.7			3.07	2.9
	8.97	2.9		5.76			3.19	3
	9.02	2.9		5.79			3.24	3
	9.4	2.9		5.8			3.41	3
	9.43	2.93		5.84			3.73	3
	9.58	2.93		6			3.84	3
	9.65	3		6			4.73	3
	9.77	3		6.06			6.4193	3
	9.99	3		6.113			6.56667	3
	10.5	3		6.16			6.62673	3
	10.6	3		6.26901			6.74224	3
	10.7	3		6.3			7.7	3.05
	11	3		6.32			8.43	3.1
	11.1	3		6.461			9.35	3.1
	11.2	3		6.497			12.4	3.1
	11.46	3.1		6.5			20	3.1
	11.5	3.1		6.5			26	3.1
	11.8	3.1		6.5			40.3	3.11
	11.98	3.1		6.54			46.2	3.14
	12.1	3.18		6.56			60	3.16
	12.4	3.2		6.6			70	3.2
	12.5	3.2		6.64			70	3.2
	12.61	3.2		6.65471			120	3.2
	12.7	3.2		6.89			130	3.2
	13.3	3.24		6.9			150	3.21
	13.3	3.3		6.94			160	3.24
	13.6	3.3		7			180	3.24
	14	3.3		7			350	3.3
	14.3	3.3		7			400	3.3
	14.4	3.3		7.03			1370	3.3
	14.6	3.34		7.04				3.3
	14.6	3.39		7.1				3.34
	15.25	3.4		7.1				3.4
	15.7	3.4		7.2				3.4
	16	3.4		7.2				3.4
	16.1	3.4		7.39				3.4
	16.5	3.4		7.4				3.46
	17.6	3.49671		7.4				3.5
	17.688	3.5		7.41				3.5
	17.7	3.5		7.54				3.6
	18	3.5		7.691				3.6
	18.09	3.5		7.78				3.7
	18.1905	3.5		7.8				3.7
	18.4	3.5		7.8				3.7
	18.492	3.6		7.82				3.8
	18.6	3.6		7.879				3.8
	19.095	3.6		7.9				3.9
	19.5	3.6		7.98				3.9
	19.5975	3.6		8.04				3.92
	19.8	3.6		8.065				3.94
	20	3.61		8.4				3.98
	20	3.61		8.404				4
	20.2005	3.63		8.42				4
	20.3	3.7		8.52				4
	20.6	3.7		8.798				4
	20.7	3.7		8.889				4
	20.8	3.7		8.9				4
	21.3	3.7		8.91				4
	21.3	3.7		8.97				4
	21.6	3.8		9				4
	21.909	3.8		9.1				4.1
	22.1	3.8		9.19				4.15
	22.8	3.8		9.27				4.18
	23	3.81		9.34				4.2
	23.28	3.82524		9.36				4.2
	23.4	3.89		9.376				4.2
	24.6	3.9		9.38				4.22
	24.8	3.9		9.66				4.28
	25	3.9		9.72				4.3
	25	3.91584		9.72813				4.3
	25.49	3.95		9.8				4.3
	26.36	3.97		9.81				4.4
	27	4		9.82				4.4
	27.1	4		9.9				4.5
	27.2	4		10				4.5
	27.3	4		10				4.5
	27.5	4		10.04				4.57
	27.537	4		10.1				4.57
	28.4	4		10.16				4.6
	28.6	4		10.2				4.6
	29.5	4		10.4				4.6
	30	4		10.4				4.68
	30	4.01		10.48				4.69
	30.39	4.1		10.48				4.7
	32.9	4.1		10.6				4.7
	33.2	4.19		10.62				4.7
	33.57	4.24		10.7				4.72
	35	4.28079		10.7				4.78
	35.7	4.3		10.86				4.78
	36	4.3		10.88				4.8
	36.7	4.3		11				4.8
	37	4.3		11				4.8
	38.3	4.35		11.037				4.88
	38.6	4.35		11.291				4.9
	39.3	4.4		11.5				4.9
	39.5	4.5		11.8				4.9
	41.3	4.5		11.9				4.9
	41.7	4.54		11.94				4.96
	43.1	4.57		11.98				4.97
	43.1	4.6		12				4.98
	43.11	4.6		12				5
	43.2	4.6		12				5
	43.3	4.61		12				5
	45.4	4.68657		12				5
	45.6	4.7		12.1				5
	47.7	4.7		12.1				5.04
	48	4.7		12.2				5.1
	48.2	4.8		12.22				5.1
	48.7	4.8		12.4				5.1
	48.76	4.8		12.47				5.1
	49.7	4.8		12.5				5.15
	50	4.81		12.612				5.15
	51	4.84		12.76				5.2
	51.1	4.9		12.82				5.2
	51.8	4.9		12.92				5.29
	52	4.98485		13				5.3
	53	5		13				5.3
	54.5	5		13				5.3
	55.5	5		13.14				5.4
	55.7	5		13.2				5.4
	56.7	5		13.3				5.4
	57.3	5		13.4				5.4
	57.8	5		13.6				5.42
	59.3	5		13.8				5.48
	59.5	5.04		14				5.5
	60.4	5.09		14				5.5
	60.5	5.1		14.1				5.5
	61.7	5.1		14.1				5.5
	61.8	5.1		14.2				5.5
	62.8	5.1		14.5				5.52
	63.5	5.1		14.52				5.55
	63.8	5.12		14.55				5.59
	64.2	5.12		14.6				5.6
	67.2	5.16162		14.72				5.6
	67.6	5.17		14.8				5.6
	68.7	5.3		14.8				5.63
	70.3	5.3		15				5.66
	70.7	5.3		15.1				5.7
	72.5	5.4		15.4				5.7
	72.8	5.40196		15.6				5.79
	73.42	5.41579		15.88				5.8
	74.2	5.44335		15.9				5.8
	74.7	5.46		15.9				5.82
	77.1	5.46798		15.91				5.9
	79.5	5.5		16				5.9
	88.8	5.5		16				5.9
	100	5.5		16				5.9
	104	5.57		16.13				5.9
	105	5.6		16.2				5.9
	106	5.6		16.2				5.9
	110	5.62069		16.3				6
	118.49	5.7		16.3				6
	120	5.7		16.588				6
	122	5.7		16.6				6
	128	5.7		16.62				6
	158	5.7		16.9				6.1
	190	5.7		17				6.1
	207	5.7		17.04				6.1
	207	5.72		17.3				6.1
	278	5.73		17.4				6.1
	370	5.73		17.7				6.1
	380	5.8		17.9542				6.2
	1527.6	5.8		18				6.2
		5.8		18.0548				6.21
		5.81		18.4				6.22
		5.9		18.4				6.3
		5.98		18.8				6.3
		6		19				6.33
		6		19				6.4
		6		19				6.42
		6		19.4				6.5
		6		19.8				6.5
		6.01		19.824				6.5
		6.03861		19.9				6.5
		6.08		20				6.5
		6.1		20				6.52
		6.1		20.1				6.6
		6.1		20.3				6.7
		6.1		20.6				6.7
		6.11		20.8				6.71
		6.2		21				6.76
		6.2		21.179				6.8
		6.22		21.184				6.8
		6.3		21.3939				6.8
		6.3		21.4				6.82
		6.4		21.42				6.9
		6.5		21.5				6.9
		6.6		21.568				6.9
		6.63		21.7				6.98
		6.7		21.7				7
		6.7		22				7
		6.74		22.2				7
		6.75		22.5				7
		6.8		22.64				7
		6.8		22.835				7
		6.8		22.95				7.11
		6.9		23.1				7.11
		6.9		23.3				7.12
		6.9		23.5				7.2
		7		23.8				7.2
		7		23.842				7.3
		7.02		23.9				7.3
		7.1		23.9				7.3
		7.1		24				7.38
		7.15		24.15				7.4
		7.2		24.4				7.44
		7.2		24.5				7.5
		7.21		24.54				7.52
		7.28		24.621				7.55
		7.3		24.7				7.6
		7.3		24.9				7.6
		7.49		24.9				7.7
		7.5		24.906				7.7
		7.5		25				7.7
		7.51		25.1				7.71
		7.53		25.2				7.8
		7.6		25.31				7.82
		7.6		25.65				7.9
		7.61		25.8				8
		7.78		25.9				8
		7.8		26				8
		7.8		26.2				8.02
		7.8		26.3				8.04
		7.82		26.36				8.1
		7.88		26.5				8.1
		7.9		26.59				8.1
		7.97		26.6				8.23
		7.99		26.736				8.39
		8		27				8.4
		8		27.3				8.5
		8		27.5				8.53
		8.02		27.56				8.53
		8.2		27.6				8.6
		8.2		27.9				8.65
		8.3		27.9				8.69
		8.35		28				8.75
		8.37		28				8.8
		8.39		28.3				8.8
		8.4		28.3				8.86
		8.43		28.5				8.87
		8.44		28.544				8.93
		8.45		28.92				8.99
		8.5		29.1				9
		8.5		29.1				9.26
		8.52		29.143				9.33
		8.55		29.32				9.43
		8.6		29.4				9.6
		8.6		30.1				9.6
		8.6		30.2				9.65
		8.6		30.3				9.7
		8.64		30.355				9.7
		8.65		30.355				9.8
		8.65		30.5				9.85
		8.7		30.6				9.88
		8.7		30.6				9.91
		8.7		30.7				10
		8.72		30.9				10
		8.73659		30.9				10.1
		8.8		31				10.2
		8.88		31.2				10.26
		9		31.2				10.29
		9		31.3				10.3
		9.02		31.3				10.4
		9.03		31.52				10.5
		9.04		31.6				10.5
		9.2		31.6				10.5
		9.2		31.7				10.6
		9.3		31.72				10.6
		9.34		31.8				10.6
		9.37879		31.9				10.7
		9.38		32.2				10.7
		9.4		32.4				10.7
		9.4		32.8				10.9
		9.47		32.963				10.9
		9.49		33				11
		9.5		33.05				11
		9.6		33.1				11.1
		9.61		33.16				11.1
		9.77665		33.2				11.14
		9.8		33.209				11.3
		9.91		33.2892				11.3
		9.95		33.3				11.4
		10		33.3				11.5
		10		33.35				11.5
		10		33.6				11.6
		10		33.8				11.7
		10		33.8				11.8
		10		34.1				11.89
		10.1		34.5				11.9
		10.1		34.6				11.9
		10.1		34.9				11.9
		10.19		35.2				12
		10.2		36.2				12
		10.29		36.27				12.1
		10.3		36.4				12.18
		10.3		36.622				12.2
		10.4		36.65				12.5
		10.4		36.8				12.5
		10.5		37				12.6
		10.5		37.468				12.68
		10.6		38				12.7
		10.6		38.85				12.9
		10.6716		38.98				13
		10.7		39.302				13.18
		10.8		39.4				13.56
		10.8		39.5				13.7
		11		40				13.8
		11		40				13.83
		11.1		40.1				14.1
		11.1		40.2				14.1
		11.1		40.5				14.26
		11.19		41.2				14.3
		11.3		41.267				14.5
		11.3		41.3				14.5
		11.3		41.4				14.6
		11.4		41.4				14.7
		11.7		41.474				14.72
		11.7		41.7				14.8
		11.8		42.203				14.8
		11.8		42.7				15
		11.8		42.9				15.04
		11.8		43.2				15.1
		11.9		43.8				15.2
		11.9		43.8				15.3
		12		44				15.3
		12		44.231				15.6
		12		44.36				15.7
		12.1		44.7				15.7
		12.3		45				16.2
		12.58		45.223				16.3
		12.6		45.492				16.3
		12.6		45.6				16.4
		12.6		45.711				16.4
		12.6		46.5				16.8
		12.7		46.7				17.1
		12.8		46.703				17.1
		12.8		47				17.3
		12.9		47.2				17.4
		13		47.2				17.5
		13.1		47.4				17.64
		13.1		47.464				17.65
		13.2		47.7				17.73
		13.2814		47.8				17.8
		13.3		48.3				17.9
		13.3		48.7				18
		13.3		48.95				18.1
		13.3		48.999				18.2
		13.3		49.2				18.8
		13.3		49.25				18.9
		13.4		49.3				19.3
		13.57		49.85				19.5
		13.58		50				19.6
		13.7		50				19.7
		13.8		50.101				19.8
		13.8		50.101				19.8
		13.88		50.4				19.8
		14.1		50.8				20.1
		14.2249		51.9				20.2
		14.3		52				20.35
		14.43		52.3				20.6
		14.4455		52.8				20.7
		14.4455		52.882				20.8
		14.5		54.275				20.9
		14.6		54.6				21.2
		14.922		55.3				21.45
		15.1		55.5				21.9
		15.1		55.7				22.1
		15.2		56				22.2
		15.2		56.3				22.5
		15.23		56.8				22.55
		15.4		57.2				22.63
		15.7		58.345				22.9
		15.9		58.402				23.1
		16		59.1				23.3
		16		59.5				23.5
		16		59.603				23.5
		16		60.3919				23.6
		16		61.2				23.8
		16.08		61.4				24
		16.1		62.16				24.4
		16.2		62.5				24.7
		16.2		64.5				24.8
		16.2		65.11				24.9
		16.4		66.3				25.5
		16.6		68.1				25.86
		16.9		69.3				25.9
		16.9		69.409				26
		17		69.8				26.1
		17		70				26.2
		17.1		70				26.6
		17.5		70				26.7
		17.5		70.3				26.9
		17.5		70.8				27
		17.6		70.9				27
		17.6		72.86				27.1
		17.8		73.28				27.2
		17.9426		73.5				27.31
		17.9426		74.7				27.6
		18		76.4				27.6
		18		77.1				28
		18.2		77.69				28.4
		18.3		78				28.5
		18.4		78				28.8
		18.4365		78.971				28.8
		18.6		79.7				28.89
		18.9		80				28.9
		18.91		82				30
		19		82.2				30.1
		19		83.331				30.2
		19.435		84.52				30.3
		19.47		85.836				30.3
		19.5551		88.2				30.3
		19.8		89.1				30.5
		20		90.7				30.7
		20		91.3596				30.8
		20		96.827				31.1
		20		97.79				31.1
		20		100				31.1
		20		102				31.4
		20		103				31.9
		20		103				31.9
		20.1		105				32.2
		20.3		106				32.6
		20.4		107.743				33
		20.5		109				33.1
		20.5		110				33.7
		20.51		113				33.75
		20.6577		114				33.9
		20.7		114				34.3
		20.7		120				34.5
		20.7		121.392				34.8
		20.9216		124				34.85
		21		124.468				35.3
		21.3		125.635				35.4
		21.4		127				35.6
		21.5		130				35.9
		21.5		133				35.9
		21.5		136				36.8
		21.5		140.531				36.8
		22.2		142.8				37
		22.2		148				37.65
		22.3		152.715				38.2
		22.4		154				38.6
		22.5		157				38.7
		22.5		158				39.1
		22.5		159.8				39.7
		22.6		162				40
		22.6		162				40.3
		22.8		167				40.3
		23		168				40.3
		23		170				40.3
		23.1		170				40.3
		23.5		170				40.6
		23.6		178				40.9
		23.6		178				41.4
		23.7		180				41.9
		23.7		180				42.7
		23.803		193				43
		23.9		199.587				43.43
		23.9		200				43.8
		23.9		203				44.8
		24		210				45
		24.2		210				45.5
		24.4		212.6				46.4
		24.4		214				46.8
		24.9		216.5				46.9
		25		223				48.3
		25		230.492				48.4
		25.1		234				48.45
		25.5		240				48.91
		25.9		241				51
		26		262				51.5
		26.1		269				52.5
		26.2		272				52.6
		26.3		276				53
		26.3913		301				53.4
		26.3913		320				53.5
		26.4		329				54.7
		26.9755		334				55
		27		350				55.3
		27.27		350				56.3
		27.6		353				56.7
		27.8		354.86				57.4
		27.803		372				57.6
		28.1		379.1				58
		28.4		410				58.3
		28.4		418				58.5
		28.4829		420				58.5
		28.7		440				58.6
		28.7		443				59
		28.8		448				59.47
		29		450				59.5
		29.9		460				60
		30		480				60.5
		30		489				61.5
		30		493.878				61.5
		30.1		493.878				61.5
		30.1		544				61.9655
		30.1		554				62.2
		30.4		559				62.58
		30.7		570				63.3
		30.97		578				64.3
		31.2		580				65
		31.2		581				65.9
		31.3		602				67.6
		31.6		618				67.8
		31.7		626				68.6
		31.7		635				69.2
		31.7438		647				70.2
		32		723				70.3
		32.1		740				71.8
		32.3		787				74.5
		33		789				74.8
		33.1		842				75.6
		33.19		856				76.4
		33.3		876				76.5
		33.46		878				76.9
		33.7		900				77
		33.9795		914				80
		34.55		920				80
		34.6		924				88.2
		34.7		938				90
		34.7		972.53				94
		35		984				94.5
		35.5024		1020				94.5
		35.5024		1030				95.85
		35.98		1110				98
		36		1180				101.5
		37.8		1210				102
		37.8		1240				104.5
		38		1240				106
		38		1260				114
		38		1300				115.5
		38.2		1330				117.127
		38.5		1380				121
		38.6		1390				122
		38.625		1390				122.8
		38.9		1540				123
		39.2		1740				126.2
		39.25		1790				127
		39.3		2010				129
		39.8852		2060				130.5
		39.8852		2090				137
		40		2090				139.5
		40		2940				141
		40.25		3050				145
		40.9561		3480				146
		41		4560				158.5
		41		9140				162.5
		41.04		10.1				164.5
		41.2		102.8				170
		41.3		11.6				170
		41.8		11.6				172
		42		13.8				185
		42.5		14.2				190
		42.6		152.7				190.4
		43.1		17.4				193
		43.65		17.6				198.5
		45.7		19.5				200
		48.3		2				201
		48.4		2				220
		49.4		2.4				224.5
		50.1		2.4				230
		53.2		2.5				235.5
		57		2.6				261
		57.8		21				266
		58		21.4				269.5
		59.7		21.8				275
		59.9		23.1				290
		60		26. 7				308
		60.7		3.3				331
		62		3.4				340.5
		62		3.4				376
		62.2		3.6				378.5
		65		3.8				431.5
		65.2		31.9				505
		65.7		33.6				505
		66.3		34.5				525
		67.2		4				575
		71.05		4				590
		71.5		4.4				670
		73.8		4.5				695
		76.4		4.6				720
		78.8		4.7				740
		82		4.8				900
		83.3491		49.3				920
		83.3491		5				1155
		83.7		5.1				1230
		84		5.2				1400
		88		5.2				1455
		89.5		5.3				1570
		90		5.3				1760
		90		5.4				1770
		90.5		5.4				1915
		93.86		5.5				2450
		96		6.1				2630
		98.5		6.2				3125
		99.3596		6.9				3820
		102		7.2
		103		7.3
		105.5		7.4
		110		7.6
		120		7.9
		123		8
		127		8
		139		8.2
		142		8.2
		142		8.2
		150		8.3
		151		8.5
		151.5		8.9
		155		9
		163		9.6
		170		9.8
		172		97.9
		173
		175
		196.5
		205.5
		211
		221
		222
		231
		257
		257.5
		263
		267.5
		270
		278.2
		283.5
		301.5
		304
		310
		310
		315.5
		317
		317
		321
		323.5
		329.5
		332.7
		351.5
		373.5
		377
		384.5
		389.5
		393.5
		414
		414
		420
		437.5
		470.5
		471
		497.5
		510
		520
		520
		575
		580
		600
		615
		620
		620
		620
		625
		625
		625
		625
		630
		650
		655
		655
		655
		665
		680
		720
		730
		740
		750
		765
		800
		800
		820
		835
		860
		860
		860
		910
		945
		985
		985
		1035
		1060
		1065
		1075
		1080
		1095
		1115
		1155
		1170
		1175
		1240
		1320
		1390
		1405
		1410
		1435
		1455
		1480
		1490
		1500
		1505
		1525
		1535
		1550
		1565
		1570
		1580
		1605
		1605
		1605
		1605
		1670
		1690
		1800
		1825
		1875
		1970
		2015
		2035
		2065
		2120
		2120
		2215
		2330
		2505
		2565
		2745
		2845
		3070
		3165
		3575
		3595
		3660
		3755
		3850
		3925
		5000
		5150
		5400
		6950
		7200
		45100
		11.1
		11.7
		11.9
		117.1
		13.1
		13.8
		18.1
		2.3
		2.5
		2.9
		20.6
		225.6
		25.4
		28.7
		3.3
		3.3
		3.5
		3.6
		3.6
		3.7
		3.7
		3.8
		32.3
		4.8
		4.8
		5.1
		5.1
		5.1
		5.3
		53.0
		6.4
		65.7
		7.5
		7.9
		7.9
		9.0
		9.1
		9.1

## Sheet: Table S1(4)-NEOs-factors
	pH	concentration (ng/L)		Temperature	concentration (ng/L)		DO	concentration (ng/L)		Stream discharge	concentration (ng/L)		Turbidity	concentration (ng/L)		ORP	concentration (ng/L)		Precipation	concentration (ng/L)		Cultivated crops	concentration (ng/L)		Conductivity	concentration (ng/L)
	6.89	190		22.3	0.36		4.9	88.2		0.15	0.21		290	100		13	88.2		24.4	28.5		26	39.5		594	88.8
	6.83	100		22.3	0.54		4	154		0.15	14.3		245	20		7	154		9.7	379.1		16	20		860	57.8
	6.95	20		22.3	0.28		3	106		-0.025	0.26		26	120		10	106		9.7	78		76	9.4		830	57.3
	7.17	120		21.7	8.04		3.2	76.4		0.225	31.6		328	30		43	76.4		33.5	31.2		63	66.3		1106	63.8
	6.96	30		21.7	11.89		2.1	148		0.105	13.3		58	30		16	148		7.1	82.2		88	2.9		634	74.7
	6.88	30		21.7	4.78		3.4	105		0.345	28.7		343	20		-10.7	105		0.045	0.21		39	11.3		827	79.5
	6.92	20		21.1	8.39		6.4	45		0.346	11.8		153	110		-51.2	45		0.121	14.3		85	20.5		606	22.1
	7.04	110		21.1	8.53		6.1	46.7		0.136	30.7		109	380		-32.4	46.7		0.145	0.26		94	2.6		823	27.2
	7.03	380		21.1	5.15		3.2	74.7		-0.085	5.49		78	50		-13.9	74.7		0.251	31.6		26	38.2		736	32.9
	7.08	50		21.7	59.47		7.6	43.2		0.264	0.52		47	370		-55.7	43.2		0.12	13.3		5	12.5		743	38.3
	7.26	370		21.7	62.58		6.3	40.1		0.219	0.72		148	90		-48.1	40.1		-0.003	28.7		76	6.4		544	43.2
	6.89	110		21.7	48.91		6.5	41.7		0.079	172		290	40		-47.5	41.7		0.08	11.8		26	13.8		751	70.3
	6.87	90		21.8	2.38		5	56.3		0.096	17.8		26	20		-22.8	56.3		-0.048	30.7		6	6.6		543	51.8
	6.83	40		21.8	1.41		2.7	70.3		0.168	58.6		58	20		-22.8	70.3		-0.045	5.49		52	133.8		507	48
	7.17	20		21.8	1.44		4.9	56.7		7387	2.4		343	120		13	56.7		0.28	0.52		9	33		584	52
	6.88	20		23.6	17.73		4	68.6		4470	1.82		78	60		7	68.6		0.077	0.72		1	19		518	70.7
	6.92	120		23.6	11.14		3	70.2		14700	0.82		47	420		10	70.2		-0.108	172		5	40.5		553	48.7
	7.08	60		23.6	8.75		3.2	67.6		8073	1.4		148	50		43	67.6		0.086	17.8		76	10.7		560	105
	7.26	420		22.3	0.92		2.1	53.4		8483	1.18		290	200		16	53.4		-0.201	58.6		2	31.6		801	43.3
	6.89	320		22.3	0.69		3.4	63.3		20967	0.88		93	240		-10.7	63.3		69	2.84		63	30.5		420	51
	6.87	50		22.3	0.29		6.4	16.3		12300	2.6		245	170		-51.2	16.3		69	2.4		14	82		526	51.1
	6.83	200		21.7	0.62		6.1	32.6		7250	2.52		328	40		-32.4	32.6		69	1.8		26	142.8		738	207
	6.9	240		21.7	0.92		3.2	52.6		21400	3.86		58	120		-13.9	52.6		69	1.68		6	24.5		569	49.7
	6.95	170		21.7	0.9		7.6	36.8		17400	3.5		343	170		-55.7	36.8		69	2		52	11.5		532	61.7
	6.96	40		21.1	7.51		6.3	26		16967	5.26		153	70		-48.1	26		69	2.44		16	11.9		607	64.2
	6.88	120		21.1	8.64		6.5	45.5		34433	5.04		50	210		-47.5	45.5		69	1.76		63	20.2		549	106
	6.92	170		21.1	3.18		5	53		14533	4.36		109	740		-22.8	53		69	2.02		14	4.2		698	48.2
	7.04	70		21.7	43.65		2.7	60.5		17333	4.08		39	4560		-22.8	60.5		69	1.82		39	1.9		560	68.7
	7.08	210		21.7	41.04		4.9	23.9		36100	2.98		78	70		13	23.9		69	1.54		85	31.9		673	47.7
	7.03	740		21.7	33.19		4	20		20667	2.96		47	420		7	20		69	0.26		94	2.8		553	104
	7.1	4560		21.8	0.27		3	28.4		6267	2.08		148	120		10	28.4		69	1.98		26	190.4		964	27.5
	7.08	70		21.8	0.53		3.2	30.1		28000	2.5		290	350		43	30.1		69	2.94		52	20.9		625	72.8
	7.26	420		21.8	0.24		2.1	30.7		7387	1.94		93	150		16	30.7		69	2.2		74	11.1		1195	36
	6.89	400		23.6	5.72		3.4	38		4470	4.98		245	130		-10.7	38		69	2.46		73	8.2		643	63.5
	6.87	120		23.6	6.75		6.4	21.5		14700	1		26	20		-51.2	21.5		69	1.82		73	16.6		645	54.5
	6.83	350		23.6	5.57		6.1	13.1		8073	1.36		328	60		-32.4	13.1		69	0.7		73	78.8		531	122
	6.9	150		22.3	0.33		3.2	24.2		8483	6.06		58	70		-13.9	24.2		69	2.44		73	42		565	55.7
	6.95	130		22.3	0.3		7.6	30		20967	0.28		343	70		-55.7	30		69	2.98		73	62.2		543	158
	7.17	20		22.3	0.12		6.3	22.2		12300	1.34		109	180		-48.1	22.2		69	0.82		73	10		453	59.5
	6.96	60		21.7	0.21		6.5	26.1		7250	11.94		39	1370		-47.5	26.1		147.3	1.64		73	7.1		567	128
	6.88	70		21.7	0.17		5	26.3		21400	5.56		47	160		-22.8	26.3		147.3	1.4		73	3.5		464	61.8
	6.92	70		21.1	0.17		2.7	20.3		17400	4.56		148	80		-22.8	20.3		147.3	1.24		73	12.6		564	278
	7.03	180		21.1	0.14		4.9	41.3		16967	27.56		343	40		13	41.3		147.3	0.8		74	2.4		462	62.8
	7.1	1370		21.7	0.34		4	77.1		34433	17.04		47	200		7	77.1		147.3	1.52		74	6.3		563	207
	7.26	160		21.7	0.35		3	45.4		14533	9.9		22	88.2		10	45.4		147.3	1.28		74	6.3		594	8.65
	6.89	170		21.7	0.42		3.2	67.2		17333	14.1		33.5	154		43	67.2		147.3	0.42		74	4.3		860	19.8
	6.87	80		21.8	0.2		2.1	72.5		36100	9.36		42	106		16	72.5		147.3	1.14		62	3.8		830	6.22
	6.92	40		21.8	0.2		3.4	74.2		20667	7.4		42	76.4		-10.7	74.2		147.3	1.18		62	11.7		1106	15.7
	7.26	200		23.6	0.27		6.4	9.02		6267	5.1		19.5	148		-51.2	9.02		147.3	1.36		62	13.2		634	7.88
	7.9	0.36		23.6	0.25		6.1	6.24		28000	5.12		11.5	105		-32.4	6.24		147.3	0.3		62	5.3		827	24.4
	7.9	0.54		23.6	0.2		3.2	29.5		7387	0.06		40.5	45		-13.9	29.5		147.3	0.6		62	2.6		606	8.37
	7.9	0.28		22.3	0.2		7.6	6.96		4470	2.46		25.5	46.7		-55.7	6.96		147.3	1.78		36	2.9		823	9.02
	7.95	8.04		22.3	1.96		6.3	8.05		14700	1.28		22.5	74.7		-48.1	8.05		147.3	1.48		36	12.7		736	8.43
	7.95	11.89		21.7	0.25		6.5	8.67		8483	0.98		25.5	43.2		-47.5	8.67		147.3	1.48		36	4.7		743	12.6
	7.95	4.78		21.7	0.34		5	18.4		20967	0.06		28	40.1		-22.8	18.4		147.3	0.62		36	10		544	8.72
	7.98	8.39		21.7	0.5		2.7	39.3		12300	0.2		24.5	41.7		-22.8	39.3		147.3	0.98		36	2.5		751	23.6
	7.98	8.53		21.1	1.3		4.9	1.03		7250	4.72		51.5	56.3		13	1.03		147.3	1.28		21	7.8		543	8.55
	7.98	5.15		21.1	1.44		4	1.54		21400	2.58		44.5	70.3		7	1.54		147.3	0.7		21	25.9		507	14.5
	7.73	59.47		21.1	0.54		3	1.42		17400	1.16		22	56.7		10	1.42		147.3	0.88		21	17.5		584	9.03
	7.73	62.58		21.7	3.18		2.1	2.97		16967	13.18		33.5	68.6		16	2.97		174	3.34		79	1.7		518	16.4
	7.73	48.91		21.7	2.23		3.4	1.32		34433	5.82		42	70.2		-10.7	1.32		174	2.6		79	3.8		553	8.5
	8.3	2.38		21.7	1.22		6.4	0.809		14533	1.34		42	67.6		-51.2	0.809		174	2.7		79	59.9		560	11.1
	8.3	1.41		21.8	1.11		6.1	0.76		17333	4.6		19.5	53.4		-32.4	0.76		174	1.98		79	32.3		801	8.52
	8.3	1.44		21.8	0.28		3.2	1.43		36100	0.9		11.5	63.3		-13.9	1.43		174	2.48		79	3.6		420	10.8
	8.15	17.73		21.8	1.14		7.6	0.706		20667	0.7		40.5	16.3		-55.7	0.706		174	2.3		59	4.6		526	9.38
	8.15	11.14		23.6	1.29		6.3	0.581		6267	2.52		25.5	32.6		-48.1	0.581		174	1.66		59	6		738	21.5
	8.15	8.75		23.6	0.95		6.5	0.436		28000	1.58		22.5	52.6		-47.5	0.436		174	2.34		59	16.2		569	10.1
	7.9	0.92		23.6	0.94		5	0.832		7387	0.02		25.5	36.8		-22.8	0.832		174	2.52		59	73.8		532	9.95
	7.9	0.69		22.3	0.13		2.7	1.45		4470	0.02		28	26		-22.8	1.45		174	2.6		62	17.1		607	8.88
	7.9	0.29		22.3	0.11		4.9	211		8073	0.06		24.5	45.5		13	211		174	0.38		62	88		549	17.6
	7.95	0.62		22.3	0.1		4	321		12300	0.04		51.5	53		7	321		174	1.32		62	36		698	11.9
	7.95	0.92		21.7	0.61		3	251		7250	0.02		44.5	60.5		10	251		174	2.5		62	231		560	15.4
	7.95	0.9		21.7	0.82		3.2	241		17400	0.06		22	23.9		43	241		174	2.5		62	257		673	12.8
	7.98	7.51		21.7	0.3		2.1	308		16967	0.04		33.5	20		16	308		174	1		62	26.2		553	15.9
	7.98	8.64		21.1	0.57		3.4	282		34433	0.02		42	28.4		-10.7	282		174	1.46		62	21.3		964	10.1
	7.98	3.18		21.1	0.42		6.4	92.6		14533	0.04		42	30.1		-51.2	92.6		174	3.06		62	90.5		625	12.9
	7.73	43.65		21.1	0.1		6.1	99.4		17333	0.02		19.5	30.7		-32.4	99.4		174	3.72		62	83.7		1195	11.8
	7.73	41.04		21.7	1.1		3.2	182		36100	0.02		11.5	38		-13.9	182		174	3.38		62	22.2		643	10.3
	7.73	33.19		21.7	1.31		7.6	118		20667	0.04		40.5	21.5		-55.7	118		174	3.86		62	16.2		645	13.3
	8.3	0.27		21.7	0.16		6.3	96.9		6267	0.04		25.5	13.1		-48.1	96.9		237	3.86		62	12.6		531	17.6
	8.3	0.53		21.8	0.19		6.5	123		28000	0.06		22.5	24.2		-47.5	123		237	3.5		62	16.2		565	13.4
	8.3	0.24		21.8	0.19		5	155		7387	0.24		25.5	30		-22.8	155		237	3.06		62	13.3		543	28.7
	8.15	5.72		21.8	0.1		2.7	192		4470	0.56		28	22.2		-22.8	192		237	3.02		62	9.2		453	9.3
	8.15	6.75		23.6	1.24					14700	1.5		24.5	26.1					237	3.42		62	6		567	27.6
	8.15	5.57		23.6	0.94					8483	0.68		51.5	26.3					237	3.16		62	9.5		464	8.45
	7.9	0.33		23.6	0.26					20967	0.42		44.5	20.3					237	3.52		62	102		564	25.1
	7.9	0.3		30.7	88.2					12300	0.88		22	41.3					237	3.48		62	11.1		462	8.7
	7.9	0.12		32.7	154					7250	0.68		33.5	77.1					237	5.26		62	15.1		563	28.1
	7.95	0.21		31.5	106					21400	0.52		42	45.4					237	5.88		86	9.2		594	35.2
	7.95	0.17		30.9	76.4					17400	0.38		42	67.2					237	2.44		86	20.5		860	27.6
	7.98	0.17		31	148					16967	0.44		19.5	72.5					237	5.56		86	38		830	68.1
	7.98	0.14		31.6	105					34433	0.14		11.5	74.2					237	4.2		86	22.6		1106	25.1
	7.73	0.34		30.3	45					14533	0.28		40.5	9.02					237	4.42		79	2.7		634	55.5
	7.73	0.35		29.4	46.7					17333	0.26		25.5	6.24					237	4.58		73	13.8		827	50.4
	7.73	0.42		29.4	74.7					36100	0.46		22.5	29.5					237	6.28		73	6.5		606	24.7
	8.3	0.2		32.1	43.2					20667	0.64		25.5	6.96					237	4.54		73	14.8		823	23.5
	8.3	0.2		29.4	40.1					6267	0.66		28	8.05					237	4.04		74	24.9		736	55.3
	8.15	0.27		29.3	41.7					28000	0.8		24.5	8.67					237	3.32		21	7.2		743	61.2
	8.15	0.25		29.3	56.3					4470	0.64		51.5	18.4					237	5.04		21	4.4		544	61.4
	8.15	0.2		29.1	70.3					8073	0.1		44.5	39.3					145.7	3.32		79	27.9		751	69.8
	7.9	0.2		30.7	56.7					20967	0.38		22	1.03					145.7	4.36		79	17.3		543	47.2
	7.9	1.96		32.7	68.6					7250	0.28		33.5	1.54					145.7	2.94		59	4.8		507	59.5
	7.95	0.25		31.5	70.2					16967	1.18		42	1.42					145.7	3.18		62	3		584	49.3
	7.95	0.34		30.9	67.6					34433	0.26		19.5	2.97					145.7	2.98		62	12		518	52.3
	7.95	0.5		31	53.4					17333	0.44		11.5	1.32					145.7	2.32		62	3.4		553	52.8
	7.98	1.3		31.6	63.3					36100	0.26		40.5	0.809					145.7	10.6		62	7.8		560	44.7
	7.98	1.44		30.3	16.3					20667	0.32		25.5	0.76					145.7	2.62		62	42.7		801	41.4
	7.98	0.54		29.4	32.6					6267	0.92		22.5	1.43					145.7	4.08		62	21.4		420	44
	7.73	3.18		29.4	52.6					28000	0.54		25.5	0.706					145.7	3.62		62	23.3		526	59.1
	7.73	2.23		32.1	36.8					7387	0.14		28	0.581					145.7	3.18		62	6.6		738	54.6
	7.73	1.22		29.4	26					4470	0.26		24.5	0.436					145.7	3.76		86	10.4		569	62.5
	8.3	1.11		29.3	45.5					8073	0.12		51.5	0.832					145.7	3.26		73	2.3		532	33.8
	8.3	0.28		29.3	53					8483	0.16		44.5	1.45					145.7	3.28		73	7.2		607	25.2
	8.3	1.14		29.1	60.5					20967	0.32		22	211					145.7	3.16		73	43		549	51.9
	8.15	1.29		30.7	23.9					12300	0.3		33.5	321					145.7	3.94		73	23.8		698	47.4
	8.15	0.95		32.7	20					7250	0.28		42	251					145.7	3.58		73	30.1		560	50.8
	8.15	0.94		31.5	28.4					21400	0.3		42	241					145.7	3.98		73	8.1		673	49.2
	7.9	0.13		30.9	30.1					17400	0.3		19.5	308					145.7	11.98		74	2.4		553	43.8
	7.9	0.11		31	30.7					16967	0.24		11.5	282					145.7	2.98		62	2.1		964	22
	7.9	0.1		31.6	38					34433	0.28		40.5	92.6					103	3.16		62	2.8		625	42.9
	7.95	0.61		30.3	21.5					14533	0.18		25.5	99.4					103	2.96		36	3.1		1195	23.8
	7.95	0.82		29.4	13.1					17333	0.2		22.5	182					103	2.56		36	3.1		643	33.3
	7.95	0.3		29.4	24.2					36100	0.14		25.5	118					103	2.8		36	5.6		645	48.3
	7.98	0.57		32.1	30					20667	0.24		28	96.9					103	2.52		21	5.3		531	56.8
	7.98	0.42		29.4	22.2					6267	0.3		24.5	123					103	2		21	17.1		565	46.5
	7.98	0.1		29.3	26.1					28000	0.28		51.5	155					103	2.04		21	10.7		543	79.7
	7.73	1.1		29.3	26.3								44.5	192					103	2.06		79	-2.8		453	37
	7.73	1.31		29.1	20.3														103	2.08		79	57.4		567	90.7
	7.73	0.16		30.7	41.3														103	2.18		79	32.2		464	39.4
	8.3	0.19		32.7	77.1														103	1.82		59	1.7		564	66.3
	8.3	0.19		31.5	45.4														103	2.16		59	2.2		462	31.2
	8.3	0.1		30.9	67.2														103	2.22		59	5.9		563	69.3
	8.15	1.24		31	72.5														103	1.84		59	40.3		594	3.34
	8.15	0.94		31.6	74.2														103	2.14		62	2.4		860	10.6
	8.15	0.26		30.3	9.02														103	2.62		62	30.5		1106	6.33
	6.97	88.2		29.4	6.24														103	2.62		62	6.2		634	3.11
	7.05	154		29.4	29.5														103	2.92		62	30.3		827	14.5
	7.03	106		32.1	6.96														103	4.34		62	185		736	1.04
	6.31	76.4		29.4	8.05														103	2.5		62	12.9		743	5.63
	6.92	148		29.3	8.67														69	1.02		62	6.9		544	2.19
	7.09	105		29.3	18.4														69	1.94		62	39.7		751	15.2
	7.8	45		29.1	39.3														69	2.12		62	26.2		543	3.16
	7.48	46.7		30.7	1.03														69	0.82		62	2.4		507	6.5
	7.17	74.7		32.7	1.54														69	1.12		62	4.1		584	2.8
	7.87	43.2		31.5	1.42														69	1.18		86	5.2		518	10.7
	7.75	40.1		31	2.97														69	0.7		86	31.9		553	2.69
	7.74	41.7		31.6	1.32														69	1.12		86	31.1		560	4.78
	7.32	56.3		30.3	0.809														69	4.98		86	17.3		420	1.22
	7.32	70.3		29.4	0.76														69	4.84		36.8	11.8		526	1.13
	6.97	56.7		29.4	1.43														69	0.36		47.5	7		738	14.8
	7.05	68.6		32.1	0.706														69	3.76		8.9	4.3		569	1.71
	7.03	70.2		29.4	0.581														69	2.6		19	3.2		607	3.9
	6.31	67.6		29.3	0.436														69	1.5		36.8	6.6		549	9.43
	6.92	53.4		29.3	0.832														69	1.44		36.8	3		698	2.85
	7.09	63.3		29.1	1.45														69	1.86		36.8	3.2		560	11.9
	7.8	16.3		30.7	211														69	0.74		36.8	6.4		673	3.05
	7.48	32.6		32.7	321														69	1.64		36.8	7.9		553	11.5
	7.17	52.6		31.5	251														69	1.04		36.8	6.1		964	1.3
	7.87	36.8		30.9	241														69	1		0.1	2.2		625	6.42
	7.75	26		31	308														147.3	1.28		38.1	5.3		1195	2.58
	7.74	45.5		31.6	282														147.3	1.36		38.1	3.5		643	8.53
	7.32	53		30.3	92.6														147.3	1.08		38.1	7.2		645	7.52
	7.32	60.5		29.4	99.4														147.3	0.42		38.1	6.7		531	22.2
	6.97	23.9		29.4	182														147.3	1.2		38.1	3.3		565	7.3
	7.05	20		32.1	118														147.3	1.26		38.1	8.4		543	36.8
	7.03	28.4		29.4	96.9														147.3	0.58		38.1	8.6		453	4.57
	6.31	30.1		29.3	123														147.3	0.98		38.1	5.7		567	35.9
	6.92	30.7		29.3	155														147.3	6.06		38.1	3.9		464	4.88
	7.09	38		29.1	192														147.3	7.54		38.1	4.8		564	30.8
	7.8	21.5		22.5	88.8														147.3	0.1		38.1	4.8		462	4.96
	7.48	13.1		22.5	57.8														147.3	1.4		38.1	7.9		563	30.3
	7.17	24.2		23.7	57.3														147.3	0.84		38.1	3.6
	7.87	30		21.8	63.8														147.3	1.06		73.3	11.9
	7.75	22.2		23.6	74.7														147.3	1.04		73.3	9.1
	7.74	26.1		23.2	79.5														147.3	0.76		73.3	9.0
	7.32	26.3		23.3	22.1														147.3	0.16		73.3	25.4
	7.32	20.3		22.1	27.2														147.3	0.48		73.3	18.1
	6.97	41.3		15.4	32.9														147.3	1.08		73.3	28.7
	7.05	77.1		22.2	38.3														147.3	0.28		73.3	53.0
	7.03	45.4		23	43.2														174	1.42		73.3	117.1
	6.31	67.2		21.7	70.3														174	1.34		73.3	32.3
	6.92	72.5		22.8	51.8														174	1.16		73.3	225.6
	7.09	74.2		23.4	48														174	0.98		73.3	65.7
	7.8	9.02		20.2	52														174	0.4		73.3	13.1
	7.48	6.24		20.2	70.7														174	0.02		30.5	2.5
	7.17	29.5		21.4	48.7														174	0.18		30.5	2.9
	7.87	6.96		21.1	105														174	0.62		30.5	2.3
	7.75	8.05		20.2	43.3														174	11.94		30.5	5.1
	7.74	8.67		21.5	51														174	13.4		30.5	7.5
	7.32	18.4		23.6	51.1														174	3.38		30.5	4.8
	7.32	39.3		22.1	207														174	8.52		30.5	11.7
	6.97	1.03		24.1	49.7														174	2.92		30.5	9.1
	7.05	1.54		21	61.7														174	2.92		30.5	5.3
	7.03	1.42		26.3	64.2														174	2.46		30.5	5.1
	6.92	2.97		20.6	106														174	4.58		30.5	5.1
	7.09	1.32		23.2	48.2														174	5.64		30.5	11.1
	7.8	0.809		20.8	68.7														174	5.42		30.5	3.6
	7.48	0.76		23.7	47.7														174	6.5		47.5	3.7
	7.17	1.43		21.1	104														174	5.56		47.5	6.4
	7.87	0.706		23.6	27.5														237	13.14		47.5	7.9
	7.75	0.581		21.2	72.8														237	4.56		47.5	13.8
	7.74	0.436		23.9	36														237	3.86		47.5	3.3
	7.32	0.832		21.6	63.5														237	3.3		47.5	20.6
	7.32	1.45		23.1	54.5														237	3.58		8.9	4.7
	6.97	211		20.7	122														237	2.42		8.9	14.2
	7.05	321		23.6	55.7														237	2.78		8.9	9.0
	7.03	251		19.8	158														237	3.76		8.9	7.9
	6.31	241		23.5	59.5														237	27.56		8.9	4.6
	6.92	308		20.1	128														237	29.32		8.9	8.9
	7.09	282		23.9	61.8														237	44.36		8.9	5.0
	7.8	92.6		19.9	278														237	28.92		8.9	6.2
	7.48	99.4		24.9	62.8														237	10.48		8.9	11.6
	7.17	182		19.9	207														237	9.72		8.9	19.5
	7.87	118		22.5	8.65														237	10.48		8.9	31.9
	7.75	96.9		22.5	19.8														237	16.62		8.9	33.6
	7.74	123		23.7	6.22														237	15.88		8.9	49.3
	7.32	155		21.8	15.7														237	14.52		8.9	21.0
	7.32	192		23.6	7.88														237	10.86		36.8	5.2
	7.52	88.8		23.2	24.4														237	17.04		36.8	4.4
	7.3	57.8		23.3	8.37														145.7	10		36.8	3.4
	7.48	57.3		22.1	9.02														145.7	9.9		36.8	8.0
	7.27	63.8		15.4	8.43														145.7	7.82		36.8	5.1
	7.44	74.7		22.2	12.6														145.7	9.66		36.8	4.0
	6.84	79.5		23	8.72														145.7	8.42		36.8	7.4
	7.64	22.1		21.7	23.6														145.7	6.56		36.8	5.3
	7.05	27.2		22.8	8.55														145.7	11.98		36.8	17.4
	7.01	32.9		23.4	14.5														145.7	7.98		36.8	7.4
	7.18	38.3		20.2	9.03														145.7	14.1		36.8	8.2
	7.21	43.2		20.2	16.4														145.7	12.92		0.1	2.4
	7	70.3		21.4	8.5														145.7	21.42		0.1	3.8
	7.32	51.8		21.1	11.1														145.7	12.76		0.1	2.0
	7.14	48		20.2	8.52														145.7	4.18		0.1	5.4
	7.28	52		21.5	10.8														145.7	9.8		0.1	3.6
	6.94	70.7		23.6	9.38														145.7	10.16		0.1	4.0
	7.06	48.7		22.1	21.5														145.7	9.82		0.1	4.8
	7.06	105		24.1	10.1														145.7	10.88		0.1	5.4
	7.22	43.3		21	9.95														145.7	10.62		0.1	10.1
	7.24	51		26.3	8.88														145.7	12.22		0.1	6.9
	7.27	51.1		20.6	17.6														145.7	9.36		38.1	2.4
	7.18	207		23.2	11.9														103	7.04		73.3	5.1
	7.37	49.7		20.8	15.4														103	7.4		73.3	4.5
	7.2	61.7		23.7	12.8														103	6.16		73.3	8.2
	8.67	64.2		21.1	15.9														103	6.94		73.3	7.3
	7.02	106		23.6	10.1														103	2.24		73.3	7.2
	7.83	48.2		21.2	12.9														103	3.86		73.3	9.6
	6.87	68.7		23.9	11.8														103	5.68		73.3	21.4
	6.92	47.7		21.6	10.3														103	5.52		73.3	34.5
	6.83	104		23.1	13.3														103	5.1		73.3	9.8
	7.09	27.5		20.7	17.6														103	5.76		73.3	102.8
	6.89	72.8		23.6	13.4														103	2.48		73.3	23.1
	7.03	36		19.8	28.7														103	5.84		73.3	11.6
	7.1	63.5		23.5	9.3														103	5.14		30.5	2.6
	7.03	54.5		20.1	27.6														103	3.96		30.5	2.0
	6.78	122		23.9	8.45														103	4.68		30.5	3.3
	6.95	55.7		19.9	25.1														103	6.64		30.5	4.7
	6.86	158		24.9	8.7														103	6.54		30.5	8.0
	7.05	59.5		19.9	28.1														103	6.32		30.5	8.2
	6.83	128		22.5	35.2														103	2.66		30.5	13.8
	7.07	61.8		22.5	27.6														103	5.12		30.5	6.1
	6.8	278		23.7	68.1														69	0.06		47.5	3.4
	7.04	62.8		21.8	25.1														69	0.06		8.9	5.1
	6.76	207		23.6	55.5														69	0.2		8.9	5.6
	7.52	8.65		23.2	50.4														69	0.08		19	2.9
	7.3	19.8		23.3	24.7														69	0.18		19	3.3
	7.48	6.22		22.1	23.5														69	0.18		38.1	6.5
	7.27	15.7		15.4	55.3														69	0.5		38.1	2.4
	7.44	7.88		22.2	61.2														69	2.46		38.1	5.4
	6.84	24.4		23	61.4														69	0.38		38.1	4.0
	7.64	8.37		21.7	69.8														69	0.12		38.1	2.9
	7.05	9.02		22.8	47.2														69	0.72		38.1	3.4
	7.01	8.43		23.4	59.5														69	235.5		38.1	2.4
	7.18	12.6		20.2	49.3														69	26.6		38.1	2.7
	7.21	8.72		20.2	52.3														69	13.56		38.1	3.1
	7	23.6		21.4	52.8														69	5.9		38.1	7.6
	7.32	8.55		21.1	44.7														69	2.7		73.3	2.7
	7.14	14.5		20.2	41.4														69	4.18		73.3	3.3
	7.28	9.03		21.5	44														69	0.52		73.3	3.5
	6.94	16.4		23.6	59.1														69	1.28		73.3	4.9
	7.06	8.5		22.1	54.6														147.3	0.02		73.3	12.2
	7.06	11.1		24.1	62.5														147.3	0.16		73.3	46.4
	7.22	8.52		21	33.8														147.3	0.08		73.3	2.8
	7.24	10.8		26.3	25.2														147.3	0.38		73.3	74.8
	7.27	9.38		20.6	51.9														147.3	0.98		73.3	5.2
	7.18	21.5		23.2	47.4														147.3	2.54		30.5	3.7
	7.37	10.1		20.8	50.8														147.3	0.6		30.5	3.3
	7.2	9.95		23.7	49.2														147.3	3.24		30.5	9.6
	8.67	8.88		21.1	43.8														147.3	1.14		47.5	3.0
	7.02	17.6		23.6	22														147.3	1.2		72.7	23.7
	7.83	11.9		21.2	42.9														147.3	0.16		89.9	65.7
	6.87	15.4		23.9	23.8														147.3	0.42		73.3	25
	6.92	12.8		21.6	33.3														147.3	0.2		73.2	41
	6.83	15.9		23.1	48.3														147.3	0.02		72.9	23.5
	7.09	10.1		20.7	56.8														147.3	0.06		49.6	27.8
	6.89	12.9		23.6	46.5														174	0.36		72.1	84
	7.03	11.8		19.8	79.7														174	0.2		72.1	23.6
	7.1	10.3		23.5	37														174	0.3		72.7	278.2
	7.03	13.3		20.1	90.7														174	0.26		89.9	48.4
	6.78	17.6		23.9	39.4														174	0.12		73.3	332.7
	6.95	13.4		19.9	66.3														174	0.04		72.9	38.6
	6.86	28.7		24.9	31.2														174	0.04		49.6	76.4
	7.05	9.3		19.9	69.3														174	0.22		72.1	32.1
	6.83	27.6		22.5	3.34														174	4.72		72.1	31.7
	7.07	8.45		22.5	10.6														174	3.94		72.7	10.4
	6.8	25.1		21.8	6.33														174	1.36		89.9	24.9
	7.04	8.7		23.6	3.11														174	2.12		73.3	12.2
	6.76	28.1		23.2	14.5														174	1.09		73.2	16.9
	7.52	35.2		15.4	1.04														174	1.09		72.9	10.1
	7.3	27.6		22.2	5.63														174	0.82		49.6	13.6
	7.48	68.1		23	2.19														174	1.46		72.1	26.5
	7.27	25.1		21.7	15.2														174	2.54		72.1	16
	7.44	55.5		22.8	3.16														174	2.26		72.7	159.8
	6.84	50.4		23.4	6.5														174	2.62		89.9	32.2
	7.64	24.7		20.2	2.8														174	2.58		73.3	212.6
	7.05	23.5		20.2	10.7														237	4.22		72.9	21.5
	7.01	55.3		21.4	2.69														237	1.16		49.6	40.2
	7.18	61.2		21.1	4.78														237	0.82		72.1	14.5
	7.21	61.4		21.5	1.22														237	0.86		72.1	16.2
	7	69.8		23.6	1.13														237	0.8		72.7	4.9
	7.32	47.2		22.1	14.8														237	0.72		89.9	11.7
	7.14	59.5		24.1	1.71														237	1.72		73.3	5.3
	7.28	49.3		26.3	3.9														237	1.14		73.2	7
	6.94	52.3		20.6	9.43														237	13.18		72.9	5.5
	7.06	52.8		23.2	2.85														237	14.26		49.6	4.7
	7.06	44.7		20.8	11.9														237	12.68		72.1	28.4
	7.22	41.4		23.7	3.05														237	10.26		72.1	4.6
	7.24	44		21.1	11.5														237	1.42		72.7	126.2
	7.27	59.1		23.6	1.3														237	4.7		89.9	40.9
	7.18	54.6		21.2	6.42														237	5.52		73.3	122.8
	7.37	62.5		23.9	2.58														237	8.86		72.9	11.8
	7.2	33.8		21.6	8.53														237	5.66		49.6	41.4
	8.67	25.2		23.1	7.52														237	4.98		72.1	5.9
	7.02	51.9		20.7	22.2														237	3.46		72.1	5
	7.83	47.4		23.6	7.3														237	5.82
	6.87	50.8		19.8	36.8														145.7	1.48
	6.92	49.2		23.5	4.57														145.7	1.34
	6.83	43.8		20.1	35.9														145.7	0.92
	7.09	22		23.9	4.88														145.7	1.04
	6.89	42.9		19.9	30.8														145.7	0.66
	7.03	23.8		24.9	4.96														145.7	0.46
	7.1	33.3		19.9	30.3														145.7	7.38
	7.03	48.3																	145.7	0.7
	6.78	56.8																	145.7	4.6
	6.95	46.5																	145.7	5.04
	6.86	79.7																	145.7	7.44
	7.05	37																	145.7	3.92
	6.83	90.7																	145.7	0.62
	7.07	39.4																	145.7	1.76
	6.8	66.3																	145.7	2.08
	7.04	31.2																	145.7	3.24
	6.76	69.3																	145.7	3.14
	7.52	3.34																	145.7	2.84
	7.3	10.6																	145.7	2.66
	7.27	6.33																	145.7	0.9
	7.44	3.11																	103	1.04
	6.84	14.5																	103	0.7
	7.01	1.04																	103	0.62
	7.18	5.63																	103	0.66
	7.21	2.19																	103	0.42
	7	15.2																	103	0.64
	7.32	3.16																	103	0.72
	7.14	6.5																	103	0.82
	7.28	2.8																	103	2.52
	6.94	10.7																	103	2.84
	7.06	2.69																	103	2.04
	7.06	4.78																	103	1.94
	7.24	1.22																	103	0.78
	7.27	1.13																	103	1.1
	7.18	14.8																	103	1.16
	7.37	1.71																	103	1.6
	8.67	3.9																	103	1.62
	7.02	9.43																	103	1.74
	7.83	2.85																	103	0.9
	6.87	11.9																	103	1.58
	6.92	3.05																	69	0.04
	6.83	11.5																	69	0.02
	7.09	1.3																	69	0.02
	6.89	6.42																	69	0.02
	7.03	2.58																	69	0.06
	7.1	8.53																	69	0.02
	7.03	7.52																	69	0.02
	6.78	22.2																	69	0.02
	6.95	7.3																	69	0.02
	6.86	36.8																	69	0.02
	7.05	4.57																	69	0.02
	6.83	35.9																	69	0.02
	7.07	4.88																	69	0.02
	6.8	30.8																	147.3	0.06
	7.04	4.96																	147.3	0.06
	6.76	30.3																	147.3	0.06
	8.31	2.03																	147.3	0.04
	8.11	1.47																	147.3	0.06
	7.96	0.7																	147.3	0.06
	8.39	2.68																	147.3	0.04
	8.37	2.27																	147.3	0.06
	8.37	0.11																	147.3	0.04
	7.95	0.37																	147.3	0.04
	7.56	0.11																	147.3	0.04
	7.68	0.31																	147.3	0.02
	7.79	0.7																	147.3	0.02
	8.31	1.76																	147.3	0.04
	8.11	2.33																	174	0.02
	7.96	2.4																	174	0.04
	8.32	2.05																	174	0.04
	8.39	2.18																	174	0.02
	8.37	1.26																	174	0.04
	8.31	1.08																	174	0.04
	8.11	1.5																	174	0.04
	7.96	1.84																	174	0.04
	8.32	1.18																	174	0.02
	8.39	1.76																	174	0.02
	8.37	0.68																	174	0.02
	8.37	0.64																	174	0.02
	7.95	0.58																	174	0.02
	7.56	0.28																	174	0.02
	7.68	0.36																	174	0.02
	7.98	0.37																	174	0.02
	7.79	0.44																	174	0.02
	8.31	3.46																	237	0.06
	8.11	5.39																	237	0.06
	7.96	6.89																	237	0.06
	8.32	7.2																	237	0.04
	8.39	4.8																	237	0.02
	8.37	0.63																	237	0.06
	7.95	3.2																	237	0.04
	8.31	0.65																	237	0.06
	8.11	1.35																	237	0.04
	8.32	0.96																	237	0.02
	8.31	0.39																	237	0.02
	8.11	0.4																	237	0.02
	7.79	0.16																	237	0.02
																			237	0.02
																			237	0.02
																			237	0.04
																			237	0.04
																			237	0.02
																			237	0.04
																			237	0.02
																			145.7	0.02
																			145.7	0.04
																			145.7	0.02
																			145.7	0.06
																			145.7	0.04
																			145.7	0.02
																			145.7	0.14
																			145.7	0.02
																			145.7	0.02
																			145.7	0.04
																			145.7	0.02
																			145.7	0.04
																			145.7	0.04
																			145.7	0.02
																			145.7	0.02
																			145.7	0.04
																			145.7	0.02
																			145.7	0.26
																			145.7	0.06
																			145.7	0.02
																			103	0.04
																			103	0.04
																			103	0.04
																			103	0.04
																			103	0.02
																			103	0.02
																			103	0.04
																			103	0.04
																			103	0.04
																			103	0.02
																			103	0.04
																			103	0.04
																			103	0.06
																			103	0.04
																			103	0.06
																			103	0.06
																			103	0.08
																			103	0.06
																			103	0.06
																			103	0.06
																			69	0.62
																			69	0.24
																			69	1.82
																			69	1.4
																			69	0.1
																			69	0.48
																			69	0.58
																			69	0.36
																			69	0.56
																			69	0.72
																			69	0.1
																			69	0.44
																			69	0.38
																			69	1.18
																			69	0.72
																			69	1.5
																			147.3	0.6
																			147.3	0.7
																			147.3	0.68
																			147.3	0.8
																			147.3	1.9
																			147.3	1.16
																			147.3	1.18
																			147.3	0.3
																			147.3	0.72
																			147.3	0.1
																			147.3	0.42
																			174	0.74
																			174	0.88
																			174	0.88
																			174	0.6
																			174	0.24
																			174	0.64
																			174	3.5
																			174	0.68
																			174	0.34
																			174	0.24
																			174	0.34
																			174	0.62
																			174	0.62
																			174	1.36
																			174	0.4
																			174	0.52
																			237	0.82
																			237	0.38
																			237	0.58
																			237	0.78
																			237	0.44
																			237	0.6
																			237	0.1
																			237	0.3
																			237	0.24
																			237	0.44
																			237	0.34
																			237	0.94
																			237	0.14
																			145.7	0.24
																			145.7	0.28
																			145.7	0.34
																			145.7	0.26
																			145.7	0.6
																			145.7	0.6
																			145.7	0.3
																			145.7	0.42
																			145.7	0.46
																			103	0.64
																			103	1.36
																			103	1.14
																			103	0.66
																			103	0.74
																			103	0.5
																			103	0.66
																			103	0.92
																			103	0.66
																			103	0.72
																			103	0.26
																			103	0.18
																			103	0.66
																			103	0.22
																			103	1.34
																			103	0.8
																			69	0.64
																			69	0.26
																			69	0.7
																			69	2.6
																			69	0.1
																			147.3	0.1
																			147.3	0.1
																			147.3	0.3
																			147.3	10.5
																			147.3	0.22
																			147.3	0.1
																			147.3	0.38
																			174	0.1
																			174	0.28
																			174	0.12
																			174	0.12
																			174	0.18
																			237	0.26
																			237	0.1
																			237	0.22
																			237	0.22
																			237	1.18
																			237	1.18
																			237	0.6
																			237	0.78
																			237	0.94
																			237	0.18
																			237	0.64
																			237	1.08
																			237	0.1
																			237	0.16
																			237	0.38
																			237	0.26
																			145.7	0.2
																			145.7	0.22
																			145.7	0.78
																			145.7	0.18
																			145.7	0.44
																			145.7	0.38
																			145.7	0.7
																			145.7	6.7
																			145.7	0.24
																			145.7	0.48
																			145.7	1.02
																			145.7	0.78
																			145.7	0.66
																			145.7	1.52
																			145.7	0.26
																			103	0.24
																			103	0.32
																			103	0.42
																			103	0.22
																			103	0.12
																			103	0.2
																			103	0.92
																			103	0.92
																			103	0.2
																			103	0.72
																			103	0.12
																			103	0.18
																			103	0.2
																			103	0.28
																			103	0.72
																			103	0.52
																			103	0.54
																			69	0.22
																			69	0.14
																			69	0.44
																			69	0.1
																			69	0.18
																			69	0.22
																			69	0.74
																			69	0.26
																			69	0.22
																			69	0.26
																			69	0.3
																			69	0.2
																			69	0.42
																			69	0.18
																			69	0.2
																			69	0.24
																			69	0.18
																			147.3	0.14
																			147.3	0.12
																			147.3	0.2
																			147.3	0.14
																			147.3	0.12
																			147.3	0.14
																			147.3	0.16
																			147.3	0.16
																			147.3	0.14
																			147.3	0.3
																			147.3	0.22
																			147.3	0.22
																			147.3	0.74
																			147.3	0.3
																			147.3	1.04
																			147.3	0.9
																			147.3	0.32
																			174	0.24
																			174	0.3
																			174	0.3
																			174	0.34
																			174	0.26
																			174	0.4
																			174	0.38
																			174	0.3
																			174	0.28
																			174	0.22
																			174	0.12
																			174	0.27
																			174	0.27
																			174	0.12
																			174	0.12
																			174	0.24
																			174	0.28
																			174	0.24
																			174	0.3
																			237	0.24
																			237	0.3
																			237	0.16
																			237	0.18
																			237	0.18
																			237	0.18
																			237	0.2
																			237	0.24
																			237	0.24
																			237	0.34
																			237	0.18
																			237	0.2
																			237	0.48
																			237	0.22
																			237	0.24
																			237	0.32
																			237	0.16
																			237	0.24
																			237	0.28
																			145.7	0.12
																			145.7	0.18
																			145.7	0.18
																			145.7	0.16
																			145.7	0.12
																			145.7	0.14
																			145.7	0.62
																			145.7	0.1
																			145.7	0.2
																			145.7	0.16
																			145.7	0.2
																			145.7	0.16
																			145.7	0.46
																			145.7	0.16
																			145.7	0.16
																			145.7	0.2
																			145.7	0.18
																			145.7	0.2
																			145.7	0.88
																			145.7	0.14
																			103	0.24
																			103	0.24
																			103	0.22
																			103	0.22
																			103	0.2
																			103	0.16
																			103	0.18
																			103	0.16
																			103	0.3
																			103	0.34
																			103	0.28
																			103	0.26
																			103	0.18
																			103	0.18
																			103	0.16
																			103	0.28
																			103	0.26
																			103	0.26
																			103	0.38
																			103	0.28
